# Supplementary material for: Migration through a small pore disrupts inactive chromatin organization in neutrophil-like cells
Source: BMC Biol. 2018 Nov 26;16:142. doi: 10.1186/s12915-018-0608-2 (PMC6257957; doi:10.1186/s12915-018-0608-2)
Supplement: Supplementary file 2 — Table S1. Significantly differentially expressed genes. All genes with significantly differential gene expression (FDR < 0.05) between either 5-μm pores compared to control, 14-μm pores compared to control, or 5-μm pores compared to 14-μm pores. Sets refer to those described on page 4 (Transcriptional changes after migration and remodeling are distinct). HUGO gene names, Ensembl gene names and IDs are provided as identifiers. Columns suffixed with ‘_5’ represent results from 5-μm pore compared to control. Columns suffixed with ‘_14’ represent results from 14-μm pore compared to control. Columns suffixed with ‘_5v14’ represent results from 5-μm pore compared to 14-μm pore. The ‘padj’ shows the FDR adjusted p value. (XLSX 258 kb) [file 12915_2018_608_MOESM2_ESM.xlsx]

## Sheet: ST1
hgnc_symbol	ext_gene	ens_gene_id	log2FoldChange_5v14	padj_5v14	log2FoldChange_5vctrl	padj_5vctrl	log2FoldChange_14vctrl	padj_14vctrl	set
MTND1P23	MTND1P23	ENSG00000225972	-0.553827	0.66036	-0.486136	0.0223523	0.0606052	0.973461	set2
MTCO2P12	MTCO2P12	ENSG00000229344	-0.459997	0.420283	-0.638835	0.00207273	-0.183474	0.901159	set2
MTCO3P12	MTCO3P12	ENSG00000198744	-0.576289	0.0978584	-0.525274	0.0105783	0.0456002	0.955494	set2
CCNL2	CCNL2	ENSG00000221978	0.0523589	0.916694	0.270993	7.48692e-05	0.214017	0.00864105	set1
SLC35E2B	SLC35E2B	ENSG00000189339	-0.207368	0.259177	-0.280553	0.0029183	-0.0781211	0.662808	set2
NADK	NADK	ENSG00000008130	-0.113093	0.765631	-0.255092	0.00760665	-0.147008	0.219798	set2
PANK4	PANK4	ENSG00000157881	0.191956	0.403129	0.279515	0.0126682	0.0828362	0.779876	set2
PHF13	PHF13	ENSG00000116273	0.493978	0.0137335	0.838995	2.03631e-10	0.340252	0.134637	set3
PER3	PER3	ENSG00000049246	0.579144	0.270254	0.738217	0.0215358	0.154247	0.889264	set2
TNFRSF9	TNFRSF9	ENSG00000049249	-0.132741	0.89178	-0.374249	0.0493356	-0.24603	0.458286	set2
SLC25A33	SLC25A33	ENSG00000171612	0.0197216	0.984372	0.292464	0.00778898	0.268132	0.0449214	set1
NMNAT1	NMNAT1	ENSG00000173614	-0.192604	0.652026	-0.416469	0.00291937	-0.228553	0.340983	set2
AGTRAP	AGTRAP	ENSG00000177674	-0.23293	0.174732	-0.352841	6.87246e-05	-0.12482	0.484613	set2
TNFRSF8	TNFRSF8	ENSG00000120949	-0.624358	0.366755	-0.915367	0.0115784	-0.295036	0.688763	set2
	AC254633.1	ENSG00000272482	-0.484046	0.515903	-0.769028	0.0194583	-0.290177	0.685414	set2
DDI2	DDI2	ENSG00000197312	-0.13875	0.545273	-0.227298	0.0119624	-0.0932313	0.615475	set2
RNU1-1	RNU1-1	ENSG00000206652	-0.844069	0.45266	-1.0898	0.0208276	-0.250703	0.870985	set2
PADI4	PADI4	ENSG00000159339	-0.394404	0.265806	-0.462167	0.0418203	-0.0722751	0.908407	set2
HP1BP3	HP1BP3	ENSG00000127483	-0.143045	0.313477	-0.208892	0.00133179	-0.0704214	0.570348	set2
LINC00339	LINC00339	ENSG00000218510	-0.203573	0.625924	-0.32699	0.0365105	-0.128268	0.718891	set2
HMGCL	HMGCL	ENSG00000117305	-0.321122	0.128351	-0.571126	4.4847e-07	-0.255281	0.0893458	set2
FUCA1	FUCA1	ENSG00000179163	-0.127445	0.796819	-0.293694	0.0238157	-0.171375	0.224794	set2
PAFAH2	PAFAH2	ENSG00000158006	-0.397392	0.0313525	-0.711209	6.85876e-09	-0.318661	0.0254777	set1
EXTL1	EXTL1	ENSG00000158008	-0.384714	0.510475	-0.764217	0.00134423	-0.385018	0.280409	set2
	AL513365.2	ENSG00000225891	-0.178494	0.952059	-0.965779	0.00613911	-0.793133	0.0525455	set2
PIGV	PIGV	ENSG00000060642	-0.24362	0.599573	-0.442858	0.0097801	-0.203425	0.495165	set2
MAP3K6	MAP3K6	ENSG00000142733	0.441889	0.244991	0.630951	0.00511382	0.184233	0.782005	set2
FGR	FGR	ENSG00000000938	-0.0914102	0.823357	-0.300813	0.000302016	-0.21436	0.0372827	set1
THEMIS2	THEMIS2	ENSG00000130775	-0.204433	0.207529	-0.378697	2.2552e-06	-0.179089	0.0338932	set1
PTAFR	PTAFR	ENSG00000169403	0.312148	0.577468	1.28701	4.5279e-08	0.96996	0.000404524	set1
MED18	MED18	ENSG00000130772	-0.363955	0.296024	-0.531672	0.00537816	-0.171424	0.619862	set2
SNORA73B	SNORA73B	ENSG00000200087	-0.372346	0.149523	-0.639885	1.3287e-07	-0.2726	0.279693	set2
SNHG12	SNHG12	ENSG00000197989	-0.00884523	0.989673	0.278986	0.0144872	0.283047	0.0134541	set1
SRSF4	SRSF4	ENSG00000116350	0.0342215	0.952059	0.252142	0.000320371	0.213227	0.00556397	set1
MATN1-AS1	MATN1-AS1	ENSG00000186056	-0.879806	0.131207	-0.869689	0.0378554	0.00541496	0.997152	set2
FAM229A	FAM229A	ENSG00000225828	0.346646	0.206388	0.424122	0.0136008	0.0727604	0.900799	set2
S100PBP	S100PBP	ENSG00000116497	-0.0340291	0.959789	-0.314179	5.63973e-05	-0.28483	0.000758127	set1
RNF19B	RNF19B	ENSG00000116514	0.19092	0.589825	0.416551	0.00207555	0.221021	0.364431	set2
ZMYM1	ZMYM1	ENSG00000197056	-0.226765	0.542068	-0.344343	0.035099	-0.122183	0.744732	set2
SFPQ	SFPQ	ENSG00000116560	-0.0620978	0.868319	0.156178	0.0138111	0.213609	0.0017539	set1
KIAA0319L	KIAA0319L	ENSG00000142687	-0.144474	0.519578	-0.21827	0.0137922	-0.0787141	0.644188	set2
C1orf216	C1orf216	ENSG00000142686	0.233288	0.429188	0.414256	0.00184918	0.176346	0.54401	set2
MAP7D1	MAP7D1	ENSG00000116871	0.114415	0.826575	0.228916	0.0194032	0.109376	0.695375	set2
STK40	STK40	ENSG00000196182	0.225439	0.220216	0.234525	0.0332114	0.00433088	0.992711	set2
ZC3H12A	ZC3H12A	ENSG00000163874	0.509907	0.005818	0.935654	1.19867e-12	0.421326	0.00629899	set1
CDCA8	CDCA8	ENSG00000134690	-0.249601	0.201313	-0.241848	0.0147307	0.00290147	0.996163	set2
YRDC	YRDC	ENSG00000196449	0.0465687	0.953513	0.499941	2.59975e-06	0.448745	6.8364e-05	set1
MTF1	MTF1	ENSG00000188786	0.103223	0.753896	0.224214	0.0191587	0.116293	0.42551	set2
INPP5B	INPP5B	ENSG00000204084	0.165806	0.237807	0.259424	0.000366861	0.0890006	0.552189	set2
FHL3	FHL3	ENSG00000183386	0.624411	8.71635e-05	0.764516	2.39502e-08	0.135617	0.758589	set3
AKIRIN1	AKIRIN1	ENSG00000174574	0.079412	0.796819	0.274034	8.26758e-05	0.189961	0.0251662	set1
MFSD2A	MFSD2A	ENSG00000168389	0.793869	0.0229093	0.543308	0.0521676	-0.255471	0.711086	set3
SMAP2	SMAP2	ENSG00000084070	0.0219973	0.975634	0.266139	0.000427955	0.239316	0.00480083	set1
CTPS1	CTPS1	ENSG00000171793	0.02788	0.969674	0.21351	0.0149362	0.180823	0.10676	set2
SLFNL1-AS1	SLFNL1-AS1	ENSG00000281207	0.187253	0.810563	0.577107	0.00458916	0.385225	0.103007	set2
ZMYND12	ZMYND12	ENSG00000066185	-0.320778	0.824469	-0.786029	0.0294041	-0.469112	0.419724	set2
CCDC30	CCDC30	ENSG00000186409	-0.184676	0.877334	-0.6213	0.00986569	-0.44125	0.177576	set2
CDC20	CDC20	ENSG00000117399	-0.292631	0.0750077	-0.254207	0.00695019	0.0335475	0.91724	set2
ATP6V0B	ATP6V0B	ENSG00000117410	0.0238082	0.967374	0.163047	0.021897	0.134566	0.13955	set2
PLK3	PLK3	ENSG00000173846	0.506049	0.0178625	1.67585	2.113e-29	1.16487	1.70794e-11	set1
BTBD19	BTBD19	ENSG00000222009	0.232349	0.820785	0.750164	0.00525358	0.513151	0.245247	set2
MMACHC	MMACHC	ENSG00000132763	-0.466811	0.0434414	-0.510954	0.00256299	-0.0491278	0.920244	set3
PIK3R3	PIK3R3	ENSG00000117461	-0.372265	0.00535964	-0.53053	4.27978e-09	-0.163098	0.240683	set3
NSUN4	NSUN4	ENSG00000117481	0.11842	0.666431	0.326429	0.000351179	0.203306	0.0990478	set2
MOB3C	MOB3C	ENSG00000142961	0.366264	0.0150709	0.699665	8.76714e-12	0.328996	0.0119532	set1
CC2D1B	CC2D1B	ENSG00000154222	0.15357	0.528329	0.234171	0.024597	0.0758157	0.74747	set2
CPT2	CPT2	ENSG00000157184	-0.225275	0.2235	-0.234095	0.0312498	-0.0136282	0.971345	set2
LRP8	LRP8	ENSG00000157193	0.225252	0.169126	0.326472	9.84262e-05	0.0964127	0.644188	set2
LRRC42	LRRC42	ENSG00000116212	0.41887	0.0150709	0.447449	0.00426359	0.0241251	0.96798	set3
TCEANC2	TCEANC2	ENSG00000116205	-0.275217	0.129876	-0.495631	1.54683e-06	-0.224973	0.127684	set2
ACOT11	ACOT11	ENSG00000162390	-0.143469	0.541347	-0.251164	0.00796695	-0.112518	0.524598	set2
OMA1	OMA1	ENSG00000162600	-0.223291	0.206691	-0.328161	0.000307359	-0.109209	0.589335	set2
JUN	JUN	ENSG00000177606	-0.0166959	0.985662	1.47443	6.4391e-44	1.48631	1.10108e-31	set1
USP1	USP1	ENSG00000162607	0.00983446	0.985662	0.193435	0.023533	0.179021	0.0336626	set1
ALG6	ALG6	ENSG00000088035	-0.0655145	0.930806	-0.279483	0.017228	-0.218608	0.167786	set2
PDE4B	PDE4B	ENSG00000184588	0.389844	0.0145348	0.360977	0.000967211	-0.0330858	0.939457	set3
MIER1	MIER1	ENSG00000198160	0.021515	0.979248	0.196597	0.0255115	0.170732	0.0843556	set2
FPGT	FPGT	ENSG00000254685	-0.278713	0.285675	-0.552451	1.76805e-06	-0.2776	0.103776	set2
AK5	AK5	ENSG00000154027	-0.437876	0.759342	-0.874366	0.0442121	-0.441111	0.587987	set2
RPF1	RPF1	ENSG00000117133	0.0881938	0.862014	0.277058	0.00768181	0.184368	0.180339	set2
GTF2B	GTF2B	ENSG00000137947	0.00499764	0.993572	0.246869	0.0121683	0.237282	0.0375504	set1
GBP3	GBP3	ENSG00000117226	-0.231298	0.152231	-0.277278	0.00198673	-0.0504609	0.844882	set2
PTGES3P1	PTGES3P1	ENSG00000234518	0.353206	0.819737	0.960843	0.0257435	0.60331	0.502991	set2
GBP2	GBP2	ENSG00000162645	0.291319	0.152411	0.812735	5.04281e-16	0.516983	0.000131871	set1
LRRC8B	LRRC8B	ENSG00000197147	0.170903	0.501682	0.403787	0.000137223	0.228354	0.154645	set2
TGFBR3	TGFBR3	ENSG00000069702	0.325889	0.614247	1.70752	9.77815e-10	1.37638	8.06039e-06	set1
RPAP2	RPAP2	ENSG00000122484	-0.0806008	0.793108	-0.205998	0.00242071	-0.12997	0.198805	set2
GFI1	GFI1	ENSG00000162676	-0.13004	0.613974	-0.159073	0.0389914	-0.0338845	0.89959	set2
CCDC18-AS1	CCDC18-AS1	ENSG00000223745	-0.199682	0.467374	-0.47861	1.19709e-05	-0.283322	0.0185382	set1
F3	F3	ENSG00000117525	1.01055	1.02869e-06	1.25457	1.01737e-11	0.239641	0.669509	set3
SLC44A3	SLC44A3	ENSG00000143036	-0.340159	0.753896	-0.671762	0.0328656	-0.337036	0.589335	set2
	AC118553.2	ENSG00000283761	0.13481	0.927009	0.557682	0.0436666	0.418248	0.321021	set2
TRMT13	TRMT13	ENSG00000122435	0.00150926	0.999217	-0.25735	0.0395625	-0.263057	0.063402	set2
DBT	DBT	ENSG00000137992	-0.192235	0.312266	-0.357568	5.89101e-05	-0.169806	0.180085	set2
CDC14A	CDC14A	ENSG00000079335	-0.0169119	0.984555	-0.230378	0.0159029	-0.218079	0.027479	set1
GPSM2	GPSM2	ENSG00000121957	-0.263128	0.0739004	-0.24803	0.00907104	0.0105087	0.974278	set2
PSRC1	PSRC1	ENSG00000134222	-0.252622	0.620406	-0.537834	0.000629196	-0.290176	0.307553	set2
STRIP1	STRIP1	ENSG00000143093	0.118854	0.724137	0.286944	0.00373037	0.1634	0.211016	set2
LRIF1	LRIF1	ENSG00000121931	-0.282658	0.0485264	-0.340475	2.45074e-05	-0.0621703	0.808524	set3
CEPT1	CEPT1	ENSG00000134255	-0.0457224	0.944508	-0.21675	0.00610744	-0.175581	0.127085	set2
DENND2D	DENND2D	ENSG00000162777	0.0223168	0.991709	-0.802202	0.00763531	-0.828103	0.0190997	set1
OVGP1	OVGP1	ENSG00000085465	1.04363	0.0064767	0.902206	0.00311988	-0.14683	0.907953	set3
ADORA3	ADORA3	ENSG00000282608	-1.01162	0.0517824	-1.38367	0.000151833	-0.376754	0.532178	set2
FAM212B	FAM212B	ENSG00000197852	0.296031	0.545204	0.838521	8.34753e-07	0.53867	0.0207616	set1
PHTF1	PHTF1	ENSG00000116793	0.0723991	0.887858	0.240933	0.00535205	0.164096	0.253434	set2
PTPN22	PTPN22	ENSG00000134242	-0.159597	0.377036	-0.204652	0.0131121	-0.0495501	0.814603	set2
HIPK1	HIPK1	ENSG00000163349	0.13516	0.33968	0.392541	1.34484e-11	0.252725	5.40871e-05	set1
ATP1A1-AS1	ATP1A1-AS1	ENSG00000203865	-0.249807	0.840268	-0.965014	0.000112562	-0.719672	0.00886596	set1
CD58	CD58	ENSG00000116815	0.230071	0.41633	0.518008	8.60488e-05	0.283612	0.121509	set2
NAP1L4P1	NAP1L4P1	ENSG00000177173	0.015668	0.991316	0.676306	0.00119276	0.655744	0.00981655	set1
NOTCH2	NOTCH2	ENSG00000134250	-0.258305	0.214155	-0.335194	1.65746e-05	-0.081769	0.772587	set2
FCGR1B	FCGR1B	ENSG00000198019	-0.051145	0.968891	-0.411295	0.0190506	-0.364718	0.117837	set2
FAM72B	FAM72B	ENSG00000188610	-0.220088	0.259716	-0.31464	0.00223498	-0.0992741	0.674899	set2
FCGR1CP	FCGR1CP	ENSG00000265531	-0.0741627	0.961396	-0.453348	0.0342612	-0.383518	0.142412	set2
FAM72C	FAM72C	ENSG00000263513	-0.411118	0.036509	-0.3839	0.00807904	0.0225782	0.961316	set3
FAM72D	FAM72D	ENSG00000215784	-0.303946	0.275093	-0.468737	0.00169414	-0.169615	0.487599	set2
NOTCH2NL	NOTCH2NL	ENSG00000264343	-0.0322167	0.969674	-0.288398	0.00405149	-0.260775	0.0223945	set1
PDE4DIP	PDE4DIP	ENSG00000178104	-0.0997772	0.889534	-0.298923	0.048768	-0.203697	0.407312	set2
FCGR1A	FCGR1A	ENSG00000150337	-0.0491588	0.959789	-0.302435	0.0208441	-0.257766	0.130759	set2
TARS2	TARS2	ENSG00000143374	-0.233429	0.321089	-0.295395	0.0111944	-0.0672515	0.829068	set2
	AL356356.1	ENSG00000237781	0.0301347	0.985597	0.877658	0.000593818	0.842765	0.00281856	set1
ADAMTSL4-AS1	ADAMTSL4-AS1	ENSG00000203804	0.456694	0.0571992	0.999682	1.15664e-10	0.53803	0.0228341	set1
RN7SL600P	RN7SL600P	ENSG00000274963	0.256574	0.856495	1.06228	0.00227337	0.80171	0.121836	set2
MCL1	MCL1	ENSG00000143384	0.0338792	0.953802	0.90824	1.33558e-50	0.869801	2.42333e-46	set1
CTSK	CTSK	ENSG00000143387	0.221336	0.705348	0.447317	0.0270724	0.221312	0.644188	set2
MINDY1	MINDY1	ENSG00000143409	-0.205293	0.658771	-0.412862	0.0103966	-0.212596	0.306967	set2
GABPB2	GABPB2	ENSG00000143458	-0.117739	0.736104	-0.218402	0.0361805	-0.105346	0.596514	set2
PIP5K1A	PIP5K1A	ENSG00000143398	0.108513	0.680831	0.190241	0.0226992	0.0770607	0.66082	set2
ZNF687	ZNF687	ENSG00000143373	-0.321634	0.03997	-0.285833	0.00695019	0.0306828	0.931257	set3
TUFT1	TUFT1	ENSG00000143367	0.169294	0.944508	1.26752	0.00322611	1.09292	0.0525455	set2
INTS3	INTS3	ENSG00000143624	-0.190311	0.361807	-0.349071	3.57651e-05	-0.163833	0.143579	set2
TPM3	TPM3	ENSG00000143549	0.0730062	0.826664	0.155566	0.040969	0.0779749	0.481075	set2
ATP8B2	ATP8B2	ENSG00000143515	-0.412454	0.526271	-0.859179	0.00116212	-0.451592	0.233809	set2
IL6R	IL6R	ENSG00000160712	-0.347195	0.0331096	-0.437202	0.027984	-0.0945306	0.650049	set3
PYGO2	PYGO2	ENSG00000163348	-0.158574	0.695	-0.272542	0.0216106	-0.119259	0.645198	set2
MTX1	MTX1	ENSG00000173171	0.0824398	0.922892	0.311262	0.0267884	0.224257	0.344546	set2
ASH1L	ASH1L	ENSG00000116539	0.160488	0.20717	0.200032	0.00266547	0.0349034	0.85657	set2
RIT1	RIT1	ENSG00000143622	0.247509	0.204556	0.320905	0.000852247	0.0690631	0.804802	set2
ARHGEF2	ARHGEF2	ENSG00000116584	-0.105955	0.704066	-0.187625	0.0149634	-0.0864584	0.536816	set2
	AL355388.2	ENSG00000273002	-0.102431	0.953485	-0.605966	0.0110812	-0.507679	0.0980514	set2
LMNA	LMNA	ENSG00000160789	0.952743	0.000172383	1.56907	2.66617e-05	0.609461	0.0152126	set1
PMF1	PMF1	ENSG00000160783	0.258919	0.359108	0.411582	0.00587546	0.148056	0.657716	set2
TMEM79	TMEM79	ENSG00000163472	-0.105396	0.953185	-0.691005	0.00287735	-0.590966	0.0394841	set1
MEF2D	MEF2D	ENSG00000116604	0.17702	0.509155	0.361879	0.000113059	0.180063	0.363023	set2
	AL365181.2	ENSG00000272068	-0.128183	0.895851	-0.510217	0.00314859	-0.387305	0.0274328	set1
	AL365181.3	ENSG00000272405	-0.148996	0.762342	-0.370335	0.00473377	-0.226447	0.200898	set2
RRNAD1	RRNAD1	ENSG00000143303	-0.266117	0.3176	-0.324344	0.0118228	-0.0629208	0.886597	set2
ARHGEF11	ARHGEF11	ENSG00000132694	-0.186157	0.755406	-0.349673	0.0439881	-0.169092	0.572533	set2
FCRL2	FCRL2	ENSG00000132704	-0.185665	0.528329	-0.419618	0.00119387	-0.238823	0.160246	set2
FCRL1	FCRL1	ENSG00000163534	-0.235762	0.354874	-0.456379	0.000151833	-0.225216	0.117576	set2
CD1D	CD1D	ENSG00000158473	-0.150103	0.648524	-0.413907	4.85001e-05	-0.268434	5.19358e-05	set1
DUSP23	DUSP23	ENSG00000158716	0.215792	0.577786	0.337362	0.0388918	0.116931	0.785505	set2
CFAP45	CFAP45	ENSG00000213085	0.608204	0.460921	1.20268	0.00210327	0.587783	0.546037	set2
TAGLN2	TAGLN2	ENSG00000158710	0.141175	0.396786	0.34869	1.20295e-07	0.202868	0.00128688	set1
PIGM	PIGM	ENSG00000143315	-0.133159	0.712712	-0.257216	0.0243431	-0.128664	0.550041	set2
ARHGAP30	ARHGAP30	ENSG00000186517	-0.166682	0.386732	-0.224185	0.0149428	-0.0622928	0.735925	set2
NIT1	NIT1	ENSG00000158793	-0.0311056	0.976752	-0.290121	0.035099	-0.263505	0.131066	set2
B4GALT3	B4GALT3	ENSG00000158850	0.0518504	0.945388	0.239428	0.0439674	0.182961	0.278886	set2
HSD17B7	HSD17B7	ENSG00000132196	-0.101807	0.890125	-0.284716	0.0429784	-0.186907	0.416243	set2
	RGS5	ENSG00000232995	-0.167955	0.88211	-0.517515	0.0234963	-0.35422	0.279189	set2
POU2F1	POU2F1	ENSG00000143190	0.179255	0.28824	0.251634	0.000494936	0.067672	0.759846	set2
	AL031733.2	ENSG00000241666	0.0155472	0.991661	-1.01038	1.30769e-09	-1.03057	5.06618e-11	set1
RCSD1	RCSD1	ENSG00000198771	-0.264729	0.0232974	-0.487616	8.29684e-14	-0.227649	0.00315062	set1
ATP1B1	ATP1B1	ENSG00000143153	0.344016	0.0782518	0.466019	0.000505668	0.117615	0.731357	set2
SELP	SELP	ENSG00000174175	-0.286659	0.00855921	-0.320963	1.3508e-05	-0.0389739	0.856357	set3
METTL13	METTL13	ENSG00000010165	-0.2616	0.160704	-0.28567	0.0172091	-0.0287954	0.940137	set2
DARS2	DARS2	ENSG00000117593	-0.266738	0.114754	-0.283434	0.0103778	-0.021065	0.949508	set2
ZBTB37	ZBTB37	ENSG00000185278	-0.101674	0.762342	-0.227051	0.00558747	-0.129883	0.253178	set2
RC3H1	RC3H1	ENSG00000135870	0.290192	0.0110464	0.525175	2.05554e-18	0.230527	0.00779543	set1
RC3H1-IT1	RC3H1-IT1	ENSG00000236535	0.236352	0.782356	0.709107	0.00103246	0.468449	0.205522	set2
ABL2	ABL2	ENSG00000143322	0.113216	0.751658	0.223776	0.0261823	0.105697	0.619862	set2
MR1	MR1	ENSG00000153029	-0.173338	0.271077	-0.22538	0.00613214	-0.0566303	0.77732	set2
IER5	IER5	ENSG00000162783	0.144647	0.746176	0.303854	0.0310812	0.154647	0.536694	set2
RGS8	RGS8	ENSG00000135824	-0.756957	0.206514	-1.1429	0.000850254	-0.390927	0.521512	set2
TRMT1L	TRMT1L	ENSG00000121486	-0.303489	0.0216046	-0.55681	1.95927e-10	-0.257923	0.0136166	set1
IVNS1ABP	IVNS1ABP	ENSG00000116679	-0.234745	0.0960827	-0.187916	0.0357967	0.0423348	0.864678	set2
RGS2	RGS2	ENSG00000116741	-0.138853	0.775933	-0.318347	0.0132569	-0.183864	0.351498	set2
DENND1B	DENND1B	ENSG00000213047	0.221156	0.227201	0.227359	0.0255593	0.00178771	0.99685	set2
LINC01222	LINC01222	ENSG00000233410	-0.0159781	0.985662	-0.253201	0.0473718	-0.24168	0.134454	set2
INAVA	INAVA	ENSG00000163362	-0.591834	0.0257645	-0.762547	1.43589e-06	-0.176685	0.678308	set3
ARL8A	ARL8A	ENSG00000143862	0.173967	0.452639	0.315005	0.00194259	0.13619	0.429698	set2
PPP1R12B	PPP1R12B	ENSG00000077157	-0.24967	0.0559783	-0.320278	4.44302e-05	-0.0752493	0.644874	set2
	AC099336.2	ENSG00000236439	-0.848875	0.0739004	-1.00002	0.00258477	-0.155825	0.861327	set2
SYT2	SYT2	ENSG00000143858	-0.6415	0.000279836	-0.747491	1.00533e-07	-0.111193	0.737605	set3
KDM5B	KDM5B	ENSG00000117139	0.11949	0.528329	0.269033	6.53547e-05	0.144973	0.166865	set2
PPFIA4	PPFIA4	ENSG00000143847	-0.171418	0.363129	-0.753635	1.96691e-27	-0.586989	1.22614e-18	set1
LINC01136	LINC01136	ENSG00000233791	0.24112	0.909563	0.925808	0.0481872	0.679618	0.393871	set2
BTG2	BTG2	ENSG00000159388	0.597383	1.68178e-06	2.17409	1.48834e-54	1.57205	4.28599e-21	set1
ZBED6	ZBED6	ENSG00000257315	0.112993	0.891412	0.358084	0.0487985	0.240426	0.444826	set2
PPP1R15B	PPP1R15B	ENSG00000158615	-0.00891917	0.986107	0.274935	1.28061e-05	0.279129	0.000263456	set1
ELK4	ELK4	ENSG00000158711	0.115461	0.589825	0.190772	0.014219	0.070767	0.659123	set2
RAB7B	RAB7B	ENSG00000276600	1.31353	0.0143856	1.76637	8.88106e-06	0.447353	0.19339	set3
FAM72A	FAM72A	ENSG00000196550	-0.202262	0.528329	-0.2962	0.0284246	-0.0986952	0.751167	set2
RASSF5	RASSF5	ENSG00000266094	0.15057	0.429188	0.379871	2.9917e-07	0.224588	0.0016573	set1
FCMR	FCMR	ENSG00000162894	-0.0208058	0.993007	-0.661546	0.0472757	-0.647194	0.165908	set2
FCAMR	FCAMR	ENSG00000162897	-0.423891	0.706435	-1.14562	0.00049842	-0.726201	0.0796767	set2
CR1	CR1	ENSG00000203710	-0.356811	0.020011	-0.53343	0.00220782	-0.181265	0.0552154	set3
TRAF3IP3	TRAF3IP3	ENSG00000009790	-0.226055	0.169126	-0.373379	1.39316e-05	-0.151869	0.139989	set2
RCOR3	RCOR3	ENSG00000117625	0.203958	0.184165	0.198095	0.0402994	-0.0105452	0.973876	set2
LINC00467	LINC00467	ENSG00000153363	-0.251857	0.552355	-0.405754	0.0327614	-0.158477	0.712462	set2
GPATCH2	GPATCH2	ENSG00000092978	0.179434	0.406266	0.343586	0.000272094	0.1596	0.380181	set2
RRP15	RRP15	ENSG00000067533	0.0928973	0.858821	0.287689	0.0125471	0.190072	0.258086	set2
LYPLAL1	LYPLAL1	ENSG00000143353	-0.076547	0.935632	-0.345744	0.008432	-0.273489	0.113963	set2
DUSP10	DUSP10	ENSG00000143507	-0.283646	0.304884	0.519486	0.00109281	0.798528	2.70718e-08	set1
GTF2IP20	GTF2IP20	ENSG00000272645	-0.175474	0.702459	-0.504435	0.000218081	-0.333677	0.0519923	set2
WDR26	WDR26	ENSG00000162923	0.036762	0.946576	0.183951	0.00810315	0.142576	0.0996799	set2
LBR	LBR	ENSG00000143815	-0.149384	0.343626	-0.238799	0.000635767	-0.0939876	0.341123	set2
ENAH	ENAH	ENSG00000154380	0.184313	0.526271	0.299609	0.00732033	0.110394	0.713787	set2
SDE2	SDE2	ENSG00000143751	0.0300776	0.968074	0.243413	0.00667794	0.208836	0.0894255	set2
ITPKB	ITPKB	ENSG00000143772	0.439978	2.43346e-08	0.815861	2.02546e-40	0.371188	2.59239e-09	set1
ITPKB-IT1	ITPKB-IT1	ENSG00000228382	-0.101421	0.946809	1.25608	2.35856e-09	1.35271	1.35698e-10	set1
	AL136379.1	ENSG00000276255	-0.179094	0.941834	-0.887679	0.00594424	-0.713112	0.071225	set2
GUK1	GUK1	ENSG00000143774	0.0424683	0.952934	0.214377	0.0354766	0.167289	0.20692	set2
TRIM11	TRIM11	ENSG00000154370	0.128427	0.651771	0.287474	0.000704277	0.154305	0.233166	set2
RHOU	RHOU	ENSG00000116574	-0.262245	0.0196729	-0.333102	0.000151336	-0.0754662	0.745613	set3
TAF5L	TAF5L	ENSG00000135801	0.0655511	0.905379	0.218546	0.0259101	0.148189	0.336411	set2
TTC13	TTC13	ENSG00000143643	-0.0286501	0.981555	-0.341837	0.00963541	-0.318026	0.0314843	set1
TOMM20	TOMM20	ENSG00000173726	0.0779455	0.824298	0.181658	0.0313501	0.0990207	0.432322	set2
LYST	LYST	ENSG00000143669	-0.0796489	0.798956	-0.143848	0.0299408	-0.0687908	0.66186	set2
ERO1B	ERO1B	ENSG00000086619	0.184324	0.519308	0.370577	0.00152737	0.181788	0.361272	set2
KMO	KMO	ENSG00000117009	-0.199615	0.651771	-0.453145	0.00316407	-0.258001	0.259635	set2
CNST	CNST	ENSG00000162852	0.23937	0.141712	0.28355	0.00263383	0.0396836	0.905059	set2
	AL591848.4	ENSG00000260855	-0.290096	0.546824	-0.60827	0.000983521	-0.323058	0.264468	set2
LINC01341	LINC01341	ENSG00000227953	-0.514787	0.169126	-0.868722	0.00012878	-0.358819	0.30664	set2
SH3BP5L	SH3BP5L	ENSG00000175137	-0.0342006	0.967708	-0.261101	0.00722531	-0.231888	0.0905355	set2
ZNF672	ZNF672	ENSG00000171161	-0.36581	0.03997	-0.644466	6.39132e-10	-0.28398	0.0147137	set1
ZNF692	ZNF692	ENSG00000171163	-0.195713	0.579999	-0.453154	0.000356605	-0.262094	0.113908	set2
PGBD2	PGBD2	ENSG00000185220	-0.30252	0.256569	-0.467998	0.0014658	-0.169763	0.544584	set2
TMEM18	TMEM18	ENSG00000151353	0.0416888	0.962804	0.249343	0.0466924	0.203109	0.218505	set2
RNF144A	RNF144A	ENSG00000151692	0.210427	0.237807	0.242749	0.00766295	0.0274106	0.936664	set2
ID2	ID2	ENSG00000115738	0.12762	0.782356	-0.430248	8.98389e-05	-0.562147	4.28841e-16	set1
ADAM17	ADAM17	ENSG00000151694	0.228859	0.0936661	0.467669	1.05882e-11	0.234411	0.00917307	set1
RRM2	RRM2	ENSG00000171848	0.10833	0.725724	0.252923	0.00316012	0.139931	0.202037	set2
E2F6	E2F6	ENSG00000169016	0.0901968	0.887858	0.30369	0.0165149	0.208846	0.211016	set2
LPIN1	LPIN1	ENSG00000134324	-0.191458	0.399528	-0.259527	0.01512	-0.0728576	0.790191	set2
FAM49A	FAM49A	ENSG00000197872	-0.188943	0.312315	-0.243685	0.00940047	-0.0591865	0.778829	set2
DNMT3A	DNMT3A	ENSG00000119772	-0.205565	0.315055	-0.27632	0.0032323	-0.0758561	0.724532	set2
CENPA	CENPA	ENSG00000115163	-0.379123	0.118464	-0.428919	0.00131643	-0.0545913	0.912859	set2
NRBP1	NRBP1	ENSG00000115216	0.0975787	0.729672	0.240532	0.00154425	0.138376	0.244781	set2
CCDC121	CCDC121	ENSG00000176714	-0.262036	0.687564	-0.579987	0.00578659	-0.322568	0.330891	set2
FOSL2	FOSL2	ENSG00000075426	0.353114	0.0174058	0.556691	1.14773e-06	0.198942	0.378202	set3
PLB1	PLB1	ENSG00000163803	-0.0978821	0.752635	-0.302462	9.52939e-05	-0.209179	0.0271766	set1
WDR43	WDR43	ENSG00000163811	0.16736	0.275093	0.309904	1.58998e-05	0.138054	0.207256	set2
TOGARAM2	TOGARAM2	ENSG00000189350	-0.235358	0.528329	-0.677848	4.19252e-07	-0.447242	0.00722882	set1
YPEL5	YPEL5	ENSG00000119801	0.161516	0.545204	0.485285	2.50132e-07	0.319474	0.00030479	set1
NLRC4	NLRC4	ENSG00000091106	-0.295128	0.0953229	-0.676172	5.40708e-11	-0.385508	0.000628864	set1
CRIM1	CRIM1	ENSG00000150938	0.230483	0.22603	0.440566	4.16189e-06	0.205474	0.180339	set2
HEATR5B	HEATR5B	ENSG00000008869	0.143516	0.426073	0.216716	0.00332893	0.0687183	0.713511	set2
GPATCH11	GPATCH11	ENSG00000152133	0.0641289	0.910043	0.332182	0.000198351	0.263606	0.00346533	set1
CDC42EP3	CDC42EP3	ENSG00000163171	0.11673	0.823357	0.287622	0.0355824	0.166488	0.440961	set2
CYP1B1-AS1	CYP1B1-AS1	ENSG00000232973	-0.102491	0.826664	-0.274387	0.0225572	-0.176706	0.319069	set2
HNRNPLL	HNRNPLL	ENSG00000143889	0.177098	0.271077	-0.200491	0.019896	-0.382207	2.16379e-12	set1
GEMIN6	GEMIN6	ENSG00000152147	-0.205996	0.729792	-0.514335	0.00580771	-0.31297	0.244781	set2
SLC8A1	SLC8A1	ENSG00000183023	0.556656	0.0329558	0.479505	0.00823607	-0.0812153	0.901542	set3
MTA3	MTA3	ENSG00000057935	-0.306656	0.219031	-0.367805	0.0139491	-0.0657994	0.881035	set2
RHOQ	RHOQ	ENSG00000119729	0.142492	0.44688	0.211695	0.00790899	0.06448	0.728287	set2
SOCS5	SOCS5	ENSG00000171150	0.260246	0.157994	0.342112	0.000443527	0.0772857	0.786581	set2
BCYRN1	BCYRN1	ENSG00000236824	-1.0917	0.148056	-1.14854	0.00860156	-0.0625652	0.966897	set2
MSH6	MSH6	ENSG00000116062	0.0315388	0.963655	0.192022	0.0357967	0.15575	0.0973356	set2
PPP1R21	PPP1R21	ENSG00000162869	-0.129304	0.625739	-0.290709	0.000746215	-0.165959	0.181675	set2
GPR75	GPR75	ENSG00000119737	0.493208	0.0793885	0.600591	0.00412959	0.10263	0.888764	set2
PSME4	PSME4	ENSG00000068878	0.101119	0.628684	0.192047	0.00391826	0.0863269	0.487892	set2
SPTBN1	SPTBN1	ENSG00000115306	-0.317646	0.000524016	-0.331598	8.77884e-06	-0.0186233	0.94579	set3
RTN4	RTN4	ENSG00000115310	0.0503689	0.930941	0.269995	0.000444943	0.214909	0.048301	set1
CLHC1	CLHC1	ENSG00000162994	-0.136098	0.762342	-0.502083	5.25413e-08	-0.370782	0.00187532	set1
BCL11A	BCL11A	ENSG00000119866	-0.44563	0.0649797	-0.711589	1.21753e-06	-0.271109	0.296453	set2
PUS10	PUS10	ENSG00000162927	-0.213913	0.528329	-0.46384	0.000155928	-0.253889	0.149819	set2
	AC016747.1	ENSG00000212978	-0.256753	0.612872	-0.474375	0.0225572	-0.222511	0.565528	set2
XPO1	XPO1	ENSG00000082898	-0.11774	0.467374	-0.220304	0.000424466	-0.107159	0.242698	set2
PELI1	PELI1	ENSG00000197329	0.0718383	0.939639	0.614888	5.35951e-06	0.538502	0.000205312	set1
AFTPH	AFTPH	ENSG00000119844	0.099582	0.762342	0.20528	0.0239919	0.101267	0.552398	set2
SERTAD2	SERTAD2	ENSG00000179833	0.00799561	0.991661	0.23557	0.0194032	0.22262	0.0473865	set1
PPP3R1	PPP3R1	ENSG00000221823	0.0791214	0.870426	0.24088	0.00547648	0.15692	0.194653	set2
GFPT1	GFPT1	ENSG00000198380	0.13419	0.504601	0.188288	0.0314483	0.0495435	0.828353	set2
MXD1	MXD1	ENSG00000059728	0.122884	0.723807	0.447498	5.82547e-06	0.320109	0.00105686	set1
TIA1	TIA1	ENSG00000116001	-0.109517	0.687564	-0.283899	0.000384538	-0.178879	0.0764569	set2
PCYOX1	PCYOX1	ENSG00000116005	-0.288086	0.394134	-0.352092	0.0429671	-0.0689698	0.853501	set2
NAGK	NAGK	ENSG00000124357	-0.0261885	0.972446	-0.273136	0.000697487	-0.251433	0.00350422	set1
MTHFD2	MTHFD2	ENSG00000065911	0.167147	0.324509	0.281385	0.000635767	0.10964	0.393871	set2
LOXL3	LOXL3	ENSG00000115318	-0.09326	0.907543	-0.313844	0.0283222	-0.225256	0.256365	set2
RN7SKP203	RN7SKP203	ENSG00000200488	-0.580216	0.579999	-0.769888	1.79681e-10	-0.195575	0.887246	set2
KCMF1	KCMF1	ENSG00000176407	0.139928	0.553936	0.226802	0.0181865	0.0823085	0.700802	set2
RETSAT	RETSAT	ENSG00000042445	-0.180018	0.648524	-0.314814	0.0261119	-0.139801	0.6239	set2
ATOH8	ATOH8	ENSG00000168874	-0.258502	0.790382	-0.689327	0.00229132	-0.43676	0.0688111	set2
POLR1A	POLR1A	ENSG00000068654	-0.127238	0.680917	-0.175848	0.0454549	-0.0535854	0.840456	set2
KDM3A	KDM3A	ENSG00000115548	0.114276	0.705338	0.583534	6.56047e-16	0.464889	1.11124e-11	set1
KRCC1	KRCC1	ENSG00000172086	-0.38078	0.0723948	-0.542823	8.06943e-06	-0.166478	0.504008	set2
ZNF514	ZNF514	ENSG00000144026	-0.243251	0.887858	-0.827509	0.00879789	-0.589945	0.178914	set2
DUSP2	DUSP2	ENSG00000158050	0.991971	9.0484e-07	2.10671	1.05587e-25	1.11089	3.38063e-05	set1
SEMA4C	SEMA4C	ENSG00000168758	-0.182493	0.589825	-0.392607	0.00473377	-0.2149	0.341202	set2
SH3RF3	SH3RF3	ENSG00000172985	-0.367681	0.0469793	-0.320782	0.00737844	0.0419342	0.906998	set3
BCL2L11	BCL2L11	ENSG00000153094	0.0883141	0.85862	0.259933	0.000575702	0.166685	0.290213	set2
	AC017002.1	ENSG00000224959	0.367216	0.308027	0.43951	0.0394114	0.0678484	0.926674	set2
MERTK	MERTK	ENSG00000153208	-0.476524	0.00274336	-0.391448	0.00299081	0.0804236	0.7277	set3
ZC3H6	ZC3H6	ENSG00000188177	-0.238561	0.294119	-0.527886	6.66414e-07	-0.294003	0.0289199	set1
SLC20A1	SLC20A1	ENSG00000144136	0.398261	9.83824e-05	0.528648	1.05882e-11	0.125751	0.347204	set3
IL1B	IL1B	ENSG00000125538	0.996045	2.9827e-08	1.25028	2.83765e-17	0.249406	0.587987	set3
	AC110769.2	ENSG00000270019	-0.298518	0.607891	-0.44834	0.0324539	-0.153975	0.786581	set2
MAP3K2	MAP3K2	ENSG00000169967	0.221199	0.202206	0.299289	0.00177873	0.0736173	0.718617	set2
AMMECR1L	AMMECR1L	ENSG00000144233	0.15009	0.709101	0.307332	0.0284246	0.152618	0.612869	set2
ZEB2	ZEB2	ENSG00000169554	0.363492	0.00345231	0.720485	1.19654e-23	0.352535	6.42665e-06	set1
	AC009951.1	ENSG00000279166	0.401369	0.0240814	0.722478	3.98715e-13	0.316914	0.0431306	set1
RIF1	RIF1	ENSG00000080345	0.117597	0.571532	0.17936	0.0194583	0.0572397	0.709449	set2
NR4A2	NR4A2	ENSG00000153234	0.0503594	0.97496	2.14169	5.03711e-29	2.08655	6.78733e-23	set1
TANK	TANK	ENSG00000136560	0.0918416	0.851629	0.207083	0.0310049	0.110961	0.576539	set2
DHRS9	DHRS9	ENSG00000073737	-0.174554	0.819717	-0.599555	0.00129057	-0.429235	0.0230871	set1
HAT1	HAT1	ENSG00000128708	0.24988	0.0960827	0.465221	2.13845e-09	0.211081	0.0498241	set1
DLX2	DLX2	ENSG00000115844	0.198919	0.923315	1.72397	4.84089e-06	1.52026	3.18274e-05	set1
PDK1	PDK1	ENSG00000152256	0.264596	0.101629	0.419901	3.12778e-06	0.150659	0.421921	set2
WIPF1	WIPF1	ENSG00000115935	-0.307196	0.0490098	-0.42028	3.55885e-07	-0.11792	0.460825	set3
H3F3AP4	H3F3AP4	ENSG00000235655	0.0453911	0.94522	0.203365	0.0395374	0.153514	0.18359	set2
NFE2L2	NFE2L2	ENSG00000116044	0.172727	0.326481	0.712345	9.14481e-23	0.535074	9.04817e-17	set1
DNAJC19P5	DNAJC19P5	ENSG00000225808	0.349335	0.805408	0.969185	0.0228564	0.615102	0.39604	set2
MIR3128	MIR3128	ENSG00000265396	0.188079	0.944508	0.967274	0.0441232	0.774141	0.263847	set2
DUSP19	DUSP19	ENSG00000162999	-0.31462	0.706077	-0.674656	0.00969223	-0.363999	0.363085	set2
PMS1	PMS1	ENSG00000064933	-0.0970344	0.844455	-0.2303	0.0468466	-0.137757	0.483887	set2
NAB1	NAB1	ENSG00000138386	0.328567	0.0182292	0.62837	6.05601e-13	0.295537	0.00402849	set1
DNAH7	DNAH7	ENSG00000118997	1.20568	0.00996638	1.20961	0.00314859	-0.000390265	0.999826	set3
ANKRD44-IT1	ANKRD44-IT1	ENSG00000236977	0.439512	0.00910536	0.533008	3.85421e-05	0.0888618	0.823833	set3
COQ10B	COQ10B	ENSG00000115520	0.0696503	0.906766	0.373754	4.20671e-05	0.29965	0.00972675	set1
KCTD18	KCTD18	ENSG00000155729	-0.241172	0.372639	-0.477865	0.000101618	-0.241409	0.166669	set2
BZW1	BZW1	ENSG00000082153	0.131376	0.571286	0.272739	0.000761296	0.136845	0.140029	set2
CLK1	CLK1	ENSG00000013441	-0.032128	0.963655	0.230981	0.00169065	0.258636	0.0068728	set1
FAM126B	FAM126B	ENSG00000155744	0.302834	0.0450853	0.265903	0.0106366	-0.0412602	0.865688	set3
CFLAR	CFLAR	ENSG00000003402	0.220562	0.0455561	0.412318	1.01737e-11	0.187217	0.00838329	set1
CARF	CARF	ENSG00000138380	-0.158122	0.57573	-0.303852	0.00453963	-0.150382	0.406015	set2
ABI2	ABI2	ENSG00000138443	0.270651	0.0450678	0.195025	0.0502553	-0.0800226	0.687962	set3
CCNYL1	CCNYL1	ENSG00000163249	0.306685	0.0664084	0.496161	4.04772e-06	0.184991	0.370526	set2
PTH2R	PTH2R	ENSG00000144407	-0.351347	0.44688	-0.517327	0.0227553	-0.170635	0.741534	set2
CPS1	CPS1	ENSG00000021826	-0.260995	0.321089	-0.359306	0.00450643	-0.103309	0.76608	set2
SMARCAL1	SMARCAL1	ENSG00000138375	-0.271029	0.120073	-0.249221	0.0339221	0.0170365	0.965828	set2
CXCR2	CXCR2	ENSG00000180871	-0.308567	0.0503168	-0.463588	1.65116e-06	-0.159896	0.344448	set2
ARPC2	ARPC2	ENSG00000163466	0.042341	0.934238	0.167642	0.0128051	0.12072	0.152463	set2
CTDSP1	CTDSP1	ENSG00000144579	0.10654	0.716086	0.255459	0.000852247	0.144123	0.239739	set2
CNOT9	CNOT9	ENSG00000144580	0.0492566	0.924298	0.176906	0.0245633	0.122975	0.250503	set2
RNF25	RNF25	ENSG00000163481	0.234377	0.510475	0.312208	0.0454693	0.0731763	0.882404	set2
TTLL4	TTLL4	ENSG00000135912	-0.12638	0.6393	-0.34968	1.63284e-05	-0.228215	0.00144921	set1
NHEJ1	NHEJ1	ENSG00000187736	0.004693	0.998146	-1.19802	2.38538e-10	-1.20783	2.60665e-10	set1
ATG9A	ATG9A	ENSG00000198925	-0.325988	0.651743	-0.503105	0.0320642	-0.18282	0.42099	set2
ANKZF1	ANKZF1	ENSG00000163516	-0.0608316	0.927009	-0.306296	0.00159297	-0.250231	0.0153608	set1
TUBA4A	TUBA4A	ENSG00000127824	-0.198813	0.326481	-0.377008	1.07549e-06	-0.183168	0.178914	set2
GMPPA	GMPPA	ENSG00000144591	-0.078483	0.905274	-0.267709	0.0254453	-0.193949	0.231921	set2
ACSL3	ACSL3	ENSG00000123983	-0.1572	0.475425	-0.249874	0.00688229	-0.097079	0.583498	set2
DOCK10	DOCK10	ENSG00000135905	-0.279957	0.0649698	-0.315484	0.00150459	-0.040059	0.881092	set2
SCARNA5	SCARNA5	ENSG00000252010	-0.618601	0.786924	-0.82159	0.024597	-0.208102	0.907478	set2
USP40	USP40	ENSG00000085982	-0.19175	0.365283	-0.395531	1.63284e-05	-0.208434	0.0805869	set2
HJURP	HJURP	ENSG00000123485	-0.16474	0.467374	-0.21846	0.0253942	-0.058414	0.809136	set2
LRRFIP1	LRRFIP1	ENSG00000124831	0.0991723	0.687564	0.182139	0.0128487	0.0784272	0.555717	set2
RBM44	RBM44	ENSG00000177483	0.273811	0.597067	0.460856	0.0443076	0.182394	0.739276	set2
PER2	PER2	ENSG00000132326	0.152343	0.508747	0.653267	1.82439e-16	0.496049	2.04906e-10	set1
GPR35	GPR35	ENSG00000178623	0.0960072	0.889958	-0.278247	0.0438987	-0.379122	0.00665891	set1
EDEM1	EDEM1	ENSG00000134109	0.0973805	0.791374	0.225777	0.0072882	0.123783	0.33298	set2
OXTR	OXTR	ENSG00000180914	-0.394231	0.780117	-0.835288	0.0327093	-0.446717	0.483096	set2
THUMPD3-AS1	THUMPD3-AS1	ENSG00000206573	0.0265468	0.973928	0.361974	4.70042e-05	0.330964	0.000454886	set1
SETD5	SETD5	ENSG00000168137	0.163741	0.236997	0.190682	0.00515501	0.0221853	0.92514	set2
MTMR14	MTMR14	ENSG00000163719	0.162322	0.241892	0.524784	5.30023e-16	0.357774	1.128e-07	set1
BRPF1	BRPF1	ENSG00000156983	0.199461	0.206503	0.2939	0.000490067	0.0896227	0.647035	set2
TADA3	TADA3	ENSG00000171148	-0.15797	0.414192	-0.187908	0.0313069	-0.034768	0.901762	set2
	AC018809.2	ENSG00000269982	-0.416778	0.792795	-0.932409	0.0164578	-0.519703	0.437505	set2
GHRL	GHRL	ENSG00000157017	-0.0962463	0.815297	-0.259053	0.00261637	-0.167363	0.220462	set2
HRH1	HRH1	ENSG00000196639	-0.840734	0.309674	-1.19278	0.00415417	-0.355453	0.719724	set2
TSEN2	TSEN2	ENSG00000154743	-0.0711239	0.939601	-0.282867	0.0478874	-0.216389	0.301746	set2
NUP210	NUP210	ENSG00000132182	-0.179004	0.874158	-0.241708	0.0122389	-0.0676808	0.925208	set2
TMEM43	TMEM43	ENSG00000170876	0.150843	0.547562	0.269243	0.00720731	0.114017	0.532903	set2
	AC090004.1	ENSG00000268279	0.325056	0.839615	1.27512	0.00207045	0.944755	0.131491	set2
SLC6A6	SLC6A6	ENSG00000131389	0.366907	0.000265489	0.419506	6.39132e-10	0.0478955	0.825551	set3
RBSN	RBSN	ENSG00000131381	-0.254924	0.285698	-0.254386	0.0455426	-0.00398103	0.994981	set2
ANKRD28	ANKRD28	ENSG00000206560	0.511095	0.179765	0.987192	3.19573e-21	0.472288	7.41106e-05	set1
RN7SL4P	RN7SL4P	ENSG00000263740	-0.795611	0.467587	-1.13087	2.69653e-06	-0.340117	0.796591	set2
TBC1D5	TBC1D5	ENSG00000131374	-0.131081	0.444529	-0.154643	0.0392688	-0.0282548	0.900731	set2
RAB5A	RAB5A	ENSG00000144566	0.0788982	0.870638	0.236787	0.0160036	0.15326	0.211066	set2
NR1D2	NR1D2	ENSG00000174738	0.336813	0.762053	0.951259	0.00475623	0.609979	0.284718	set2
RARB	RARB	ENSG00000077092	-0.271731	0.264221	-0.39242	0.00447835	-0.125192	0.687962	set2
OXSM	OXSM	ENSG00000151093	-0.0798535	0.967117	-0.551454	0.0312179	-0.475947	0.162797	set2
CMC1	CMC1	ENSG00000187118	-0.260283	0.36591	-0.451181	0.000810801	-0.195773	0.430178	set2
DYNC1LI1	DYNC1LI1	ENSG00000144635	0.123692	0.762342	0.473381	4.08344e-06	0.345265	0.000758067	set1
LRRFIP2	LRRFIP2	ENSG00000093167	0.229826	0.186551	0.370237	0.00109041	0.135815	0.586493	set2
ACVR2B	ACVR2B	ENSG00000114739	0.149628	0.729792	0.318594	0.0158191	0.164089	0.546996	set2
CSRNP1	CSRNP1	ENSG00000144655	0.206417	0.439142	0.885934	1.6577e-11	0.674958	1.83323e-06	set1
ZNF619	ZNF619	ENSG00000177873	-0.118138	0.919466	-0.427833	0.0272336	-0.314815	0.241725	set2
NKTR	NKTR	ENSG00000114857	0.20084	0.220216	0.188082	0.0222664	-0.0172169	0.951327	set2
ACKR2	ACKR2	ENSG00000144648	-0.464918	0.0645731	-0.443184	0.0155102	0.0167952	0.981833	set2
TCAIM	TCAIM	ENSG00000179152	-0.116015	0.846524	-0.282602	0.020422	-0.170638	0.452467	set2
CCR3	CCR3	ENSG00000183625	-0.242757	0.243731	-0.422012	1.21686e-05	-0.183736	0.167042	set2
CCR5	CCR5	ENSG00000160791	-0.420678	0.147305	-0.582312	0.000924847	-0.166294	0.660684	set2
ALS2CL	ALS2CL	ENSG00000178038	-0.412264	0.0401506	-0.549361	0.0601606	-0.141746	0.811194	set3
KIF9	KIF9	ENSG00000088727	0.309661	0.702069	0.954859	0.000805429	0.640267	0.122418	set2
NME6	NME6	ENSG00000172113	-0.313667	0.218909	-0.45177	0.0043762	-0.142599	0.686333	set2
TMA7	TMA7	ENSG00000232112	-0.189009	0.253868	-0.242267	0.00394946	-0.0580591	0.797759	set2
C3orf62	C3orf62	ENSG00000188315	0.0713813	0.927009	0.28614	0.0345047	0.210105	0.303829	set2
USP4	USP4	ENSG00000114316	0.220527	0.149523	0.435638	1.57261e-07	0.2105	0.103776	set2
HEMK1	HEMK1	ENSG00000114735	-0.171749	0.722194	-0.400377	0.0071207	-0.233223	0.302132	set2
LINC02019	LINC02019	ENSG00000273356	0.764373	0.0229093	0.550429	0.0310316	-0.218317	0.782005	set3
ALAS1	ALAS1	ENSG00000023330	0.216147	0.236838	0.261146	0.00719792	0.0402482	0.874847	set2
GLYCTK	GLYCTK	ENSG00000168237	0.109126	0.927009	0.436425	0.0436666	0.322748	0.271568	set2
GNL3	GNL3	ENSG00000163938	0.0872886	0.887635	0.432679	0.000109016	0.340772	0.00130497	set1
CACNA2D3	CACNA2D3	ENSG00000157445	-0.167427	0.652201	-0.276958	0.0369682	-0.114088	0.695375	set2
ARF4	ARF4	ENSG00000168374	0.08575	0.840029	0.2961	0.00054949	0.205802	0.0834341	set2
FLNB	FLNB	ENSG00000136068	-0.231281	0.359108	-0.286613	0.0175171	-0.0604304	0.870085	set2
EIF4E3	EIF4E3	ENSG00000163412	-0.841055	0.129876	-0.803339	0.0476491	0.0338294	0.980498	set2
CRYBG3	CRYBG3	ENSG00000080200	-0.271861	0.197255	-0.328039	0.00702394	-0.0605675	0.864222	set2
CPOX	CPOX	ENSG00000080819	-0.0625035	0.94522	-0.267866	0.0491437	-0.210076	0.194587	set2
FILIP1L	FILIP1L	ENSG00000168386	0.065019	0.940199	0.839644	1.76663e-30	0.77017	3.19033e-13	set1
TBC1D23	TBC1D23	ENSG00000036054	0.0874956	0.868319	0.254372	0.0217243	0.162402	0.213813	set2
ZBTB11	ZBTB11	ENSG00000066422	0.130217	0.541347	0.290162	0.000169607	0.155373	0.157333	set2
IFT57	IFT57	ENSG00000114446	0.106037	0.884013	0.330448	0.0308701	0.219884	0.368934	set2
DZIP3	DZIP3	ENSG00000198919	-0.36945	0.206543	-0.485793	0.00407886	-0.120496	0.764504	set2
NEPRO	NEPRO	ENSG00000163608	0.114261	0.705338	0.188892	0.0476066	0.0702113	0.745162	set2
USF3	USF3	ENSG00000176542	0.0872216	0.822851	0.237398	0.00839961	0.145581	0.161076	set2
GTF2E1	GTF2E1	ENSG00000153767	-0.146167	0.702459	-0.26254	0.0274204	-0.120636	0.634994	set2
GOLGB1	GOLGB1	ENSG00000173230	0.108771	0.741769	0.177623	0.0473718	0.0643771	0.729439	set2
SLC15A2	SLC15A2	ENSG00000163406	0.0282824	0.970104	-0.296373	4.77556e-05	-0.329137	9.80057e-05	set1
PARP9	PARP9	ENSG00000138496	-0.139328	0.655963	-0.235781	0.0296249	-0.100949	0.62205	set2
DTX3L	DTX3L	ENSG00000163840	-0.273068	0.00871652	-0.292213	0.000250348	-0.0237768	0.92725	set3
CCDC14	CCDC14	ENSG00000175455	-0.0877686	0.792795	-0.226649	0.00137714	-0.143443	0.158093	set2
PODXL2	PODXL2	ENSG00000114631	-0.310073	0.264172	-0.311403	0.0206068	-0.00642826	0.993143	set2
GATA2-AS1	GATA2-AS1	ENSG00000244300	0.263252	0.762342	0.58367	0.0455426	0.315756	0.567844	set2
CNBP	CNBP	ENSG00000169714	0.126743	0.51849	0.25466	0.000338201	0.123398	0.208485	set2
MBD4	MBD4	ENSG00000129071	0.0867358	0.816665	0.211709	0.0142674	0.12045	0.4052	set2
TMCC1-AS1	TMCC1-AS1	ENSG00000271270	-0.212451	0.791282	-0.773371	2.13228e-05	-0.565161	0.00560654	set1
UBA5	UBA5	ENSG00000081307	0.24861	0.101629	0.345111	8.03432e-05	0.0921512	0.641925	set2
DZIP1L	DZIP1L	ENSG00000158163	-0.189196	0.887635	-0.678668	0.00265021	-0.49458	0.0866528	set2
DBR1	DBR1	ENSG00000138231	-0.138104	0.658771	-0.287054	0.0034881	-0.153477	0.361168	set2
RASA2-IT1	RASA2-IT1	ENSG00000250170	0.523627	0.571124	1.11015	0.00495393	0.579866	0.542764	set2
ATP1B3	ATP1B3	ENSG00000069849	0.0549211	0.927009	0.198801	0.0413796	0.139213	0.358641	set2
HPS3	HPS3	ENSG00000163755	-0.230509	0.0679179	-0.389526	9.10726e-08	-0.163524	0.103776	set2
TSC22D2	TSC22D2	ENSG00000196428	0.10022	0.808722	0.302003	0.00188139	0.197053	0.183286	set2
SIAH2	SIAH2	ENSG00000181788	0.141483	0.820839	0.4461	0.00480992	0.300085	0.171834	set2
P2RY13	P2RY13	ENSG00000181631	-0.412486	0.0658608	-0.364074	0.031706	0.0439842	0.907453	set2
SUCNR1	SUCNR1	ENSG00000198829	0.215761	0.207744	0.430686	1.22561e-07	0.210502	0.0294069	set1
PLCH1	PLCH1	ENSG00000114805	-0.312612	0.169126	-0.417346	0.00263114	-0.10951	0.742538	set2
TIPARP	TIPARP	ENSG00000163659	-0.241402	0.11695	1.47276	4.92892e-19	1.70936	1.14113e-20	set1
PA2G4P4	PA2G4P4	ENSG00000230457	-0.209457	0.88124	-0.591337	0.0285033	-0.386137	0.396661	set2
CCNL1	CCNL1	ENSG00000163660	0.0234336	0.973054	0.337962	5.66711e-07	0.310016	4.9683e-06	set1
	AC092944.1	ENSG00000243176	-0.130205	0.963655	-0.787981	0.0441454	-0.661859	0.162731	set2
SHOX2	SHOX2	ENSG00000168779	-0.173282	0.621775	-0.389631	0.00191516	-0.22086	0.241184	set2
TRIM59	TRIM59	ENSG00000213186	-0.140509	0.746176	-0.305944	0.0165149	-0.170034	0.406662	set2
SKIL	SKIL	ENSG00000136603	0.773426	2.95046e-17	1.29328	6.10047e-50	0.515236	1.16767e-06	set1
PLD1	PLD1	ENSG00000075651	-0.0789769	0.936681	-0.302176	0.0333509	-0.22789	0.316488	set2
ASS1P7	ASS1P7	ENSG00000236893	-0.331492	0.847985	-1.098	0.00162942	-0.77061	0.0448647	set1
ZNF639	ZNF639	ENSG00000121864	0.0585925	0.944508	0.261825	0.0454423	0.19869	0.178914	set2
TTC14	TTC14	ENSG00000163728	-0.0606873	0.924295	-0.191094	0.0474207	-0.134829	0.251091	set2
B3GNT5	B3GNT5	ENSG00000176597	0.265366	0.0756424	0.539089	5.15334e-11	0.269254	0.032438	set1
KLHL6	KLHL6	ENSG00000172578	-0.212308	0.239331	-0.308873	0.00104608	-0.101122	0.610927	set2
ABCC5	ABCC5	ENSG00000114770	-0.12215	0.763397	-0.341009	0.00174538	-0.223499	0.0610663	set2
EIF2B5	EIF2B5	ENSG00000145191	0.0556611	0.910043	0.197287	0.017225	0.136858	0.249941	set2
	AC068631.1	ENSG00000197099	-0.764441	0.201471	-0.951545	0.00949425	-0.191235	0.840274	set2
ST6GAL1	ST6GAL1	ENSG00000073849	-0.251377	0.248145	-0.452834	5.7401e-05	-0.206237	0.237644	set2
	FLJ42393	ENSG00000279891	0.314808	0.590971	0.482036	0.0400435	0.162513	0.790765	set2
IL1RAP	IL1RAP	ENSG00000196083	0.530573	1.58847e-06	1.05281	1.55559e-37	0.517878	1.54927e-09	set1
GCNT1P3	GCNT1P3	ENSG00000231047	0.680873	0.325347	1.36368	0.000257908	0.676335	0.432322	set2
RN7SKP296	RN7SKP296	ENSG00000223117	0.805024	0.135012	1.91819	2.96424e-07	1.10752	0.0805869	set2
ATP13A3	ATP13A3	ENSG00000133657	0.0979438	0.689972	0.156426	0.0497313	0.0538233	0.771949	set2
	AC108676.1	ENSG00000244675	-0.466006	0.216679	-0.562269	0.0145523	-0.101444	0.869314	set2
FAM43A	FAM43A	ENSG00000185112	-0.388853	0.221077	-0.617672	1.07704e-05	-0.234943	0.425182	set2
LINC00969	LINC00969	ENSG00000242086	0.299006	0.0785133	0.31727	0.00568176	0.0135769	0.973461	set2
SDHAP1	SDHAP1	ENSG00000185485	0.229789	0.446442	0.306283	0.038996	0.0718089	0.840456	set2
TFRC	TFRC	ENSG00000072274	0.129853	0.551034	0.194522	0.0225574	0.0601382	0.661524	set2
RNF168	RNF168	ENSG00000163961	-0.00606524	0.993372	0.324305	0.00213944	0.3259	0.00282257	set1
SENP5	SENP5	ENSG00000119231	0.13387	0.620534	0.261536	0.00571457	0.123269	0.371889	set2
NCBP2-AS2	NCBP2-AS2	ENSG00000270170	0.0280376	0.984555	0.701668	1.99009e-05	0.668934	0.000223077	set1
LMLN	LMLN	ENSG00000185621	-0.230592	0.228891	-0.272244	0.0302574	-0.0463046	0.900799	set2
BNIP3P41	BNIP3P41	ENSG00000248302	-0.262286	0.558649	-0.925876	2.63904e-09	-0.668207	3.90369e-05	set1
ATP5I	ATP5I	ENSG00000169020	-0.151035	0.652201	-0.265755	0.0434085	-0.119429	0.653617	set2
TMEM175	TMEM175	ENSG00000127419	-0.192948	0.576519	-0.303465	0.0252943	-0.115873	0.676477	set2
SLBP	SLBP	ENSG00000163950	0.00677031	0.991661	0.206903	0.0137184	0.195519	0.0764569	set2
MXD4	MXD4	ENSG00000123933	0.110134	0.795906	0.293966	0.00727586	0.17926	0.131491	set2
RNF4	RNF4	ENSG00000063978	-0.0515633	0.923542	0.174874	0.0385848	0.221775	0.012395	set1
NOP14	NOP14	ENSG00000087269	0.00406139	0.994517	0.196317	0.0405257	0.187199	0.180339	set2
GRPEL1	GRPEL1	ENSG00000109519	0.0533756	0.940107	0.375653	3.86386e-05	0.317668	0.00188724	set1
SH3TC1	SH3TC1	ENSG00000125089	0.449943	0.00180766	0.257628	0.0443076	-0.196859	0.302291	set3
	AC005674.2	ENSG00000261490	0.019042	0.985597	0.400704	0.0108866	0.376753	0.0210502	set1
WDR1	WDR1	ENSG00000071127	-0.0163215	0.984127	0.227599	0.00105855	0.239158	0.00199002	set1
RNA5SP155	RNA5SP155	ENSG00000223086	0.250167	0.795906	1.4787	2.12043e-08	1.224	5.19358e-05	set1
FAM200B	FAM200B	ENSG00000237765	-0.0569792	0.945829	-0.275771	0.0313701	-0.223319	0.23909	set2
TAPT1-AS1	TAPT1-AS1	ENSG00000263327	-0.373335	0.589825	-0.559395	0.0491306	-0.191255	0.770812	set2
SEPSECS-AS1	SEPSECS-AS1	ENSG00000281501	-0.0758232	0.961644	-0.493874	0.0211942	-0.422519	0.0981763	set2
PI4K2B	PI4K2B	ENSG00000038210	0.19316	0.54657	0.33524	0.0114449	0.137541	0.559796	set2
RBPJ	RBPJ	ENSG00000168214	0.369733	0.00433059	0.487877	2.58114e-11	0.113736	0.54029	set3
	AC027607.1	ENSG00000248936	0.574468	0.228767	0.653712	0.0339221	0.0745779	0.948368	set2
RELL1	RELL1	ENSG00000181826	0.18856	0.240544	0.704336	3.96328e-18	0.51117	1.07396e-08	set1
TMEM156	TMEM156	ENSG00000121895	-0.0671472	0.923298	-0.238434	0.0155987	-0.175792	0.279152	set2
KLHL5	KLHL5	ENSG00000109790	0.300366	0.0649698	0.229732	0.0487985	-0.0749281	0.788338	set2
LIAS	LIAS	ENSG00000121897	0.0115476	0.989679	-0.435418	0.000148204	-0.451543	0.00016936	set1
	AC098591.2	ENSG00000250568	0.283413	0.75347	0.595378	0.0452425	0.30717	0.645198	set2
N4BP2	N4BP2	ENSG00000078177	0.0937571	0.827097	0.224798	0.0350584	0.126516	0.486271	set2
RBM47	RBM47	ENSG00000163694	-0.316517	0.392219	-0.495594	0.00818432	-0.183673	0.644188	set2
DCUN1D4	DCUN1D4	ENSG00000109184	0.294524	0.0751226	0.21902	0.0304586	-0.0796531	0.771949	set2
CHIC2	CHIC2	ENSG00000109220	0.072165	0.939655	0.313764	0.0231563	0.237172	0.173887	set2
KIT	KIT	ENSG00000157404	-0.292004	0.183275	-0.476123	9.58547e-05	-0.189006	0.37844	set2
TMEM165	TMEM165	ENSG00000134851	0.127857	0.532523	0.232678	0.00234638	0.100291	0.516605	set2
REST	REST	ENSG00000084093	-0.13446	0.547562	-0.207553	0.0231376	-0.0776686	0.634393	set2
CXCL8	CXCL8	ENSG00000169429	0.590708	2.5764e-09	2.67885	1.04643e-217	2.08359	7.92503e-115	set1
PAQR3	PAQR3	ENSG00000163291	0.0737147	0.916216	0.305973	0.0100108	0.227763	0.137553	set2
ANTXR2	ANTXR2	ENSG00000163297	0.114598	0.548569	0.285973	7.37939e-06	0.166812	0.0294069	set1
HNRNPDL	HNRNPDL	ENSG00000152795	0.0511207	0.905274	0.261006	2.12836e-05	0.205279	0.00177799	set1
ABRAXAS1	ABRAXAS1	ENSG00000163322	0.162919	0.43345	0.400527	5.14681e-06	0.232894	0.0305582	set1
UNC5C	UNC5C	ENSG00000182168	-0.354865	0.0315682	-0.262392	0.0113419	0.0874099	0.780756	set3
DAPP1	DAPP1	ENSG00000070190	0.23634	0.181813	0.560891	4.3198e-11	0.320165	0.00105861	set1
	AP001962.1	ENSG00000279913	0.155335	0.896002	0.545646	0.0354766	0.385766	0.338456	set2
SLC39A8	SLC39A8	ENSG00000138821	0.218438	0.0994276	0.401596	8.3413e-07	0.178497	0.120496	set2
NFKB1	NFKB1	ENSG00000109320	0.179624	0.312035	0.219364	0.0112791	0.0350262	0.905671	set2
TBCK	TBCK	ENSG00000145348	-0.0824197	0.881124	-0.407626	1.65628e-06	-0.329591	0.000387199	set1
ALPK1	ALPK1	ENSG00000073331	-0.227217	0.0980094	-0.220697	0.00810922	0.00184572	0.996163	set2
SYNPO2	SYNPO2	ENSG00000172403	-0.694847	0.136697	-0.826545	0.0116959	-0.135987	0.881231	set2
GTF2IP12	GTF2IP12	ENSG00000283050	-0.000700343	0.999587	-0.331976	0.00718007	-0.33631	0.00665547	set1
NUDT6	NUDT6	ENSG00000170917	-0.307018	0.237807	-0.645486	2.40221e-05	-0.343134	0.103289	set2
	AC093591.2	ENSG00000261668	0.198956	0.942579	-0.856708	0.0194583	-1.06129	0.00180738	set1
PLK4	PLK4	ENSG00000142731	0.111272	0.771661	0.245627	0.0172091	0.129744	0.315458	set2
FBXW7	FBXW7	ENSG00000109670	0.0757153	0.856037	0.198587	0.0194583	0.118394	0.42551	set2
TLR2	TLR2	ENSG00000137462	0.20577	0.391931	0.315749	0.00707727	0.105531	0.709449	set2
C4orf46	C4orf46	ENSG00000205208	0.260904	0.1158	0.383287	9.18214e-05	0.117931	0.546037	set2
MARCH1	MARCH1	ENSG00000145416	-0.594274	0.0383264	-0.417733	0.163368	0.172133	0.782005	set3
MSMO1	MSMO1	ENSG00000052802	-0.498401	2.64947e-05	-0.498181	7.00144e-07	-0.00423769	0.993465	set3
DDX60	DDX60	ENSG00000137628	-0.17431	0.658771	-0.32822	0.00811618	-0.158228	0.502173	set2
DDX60L	DDX60L	ENSG00000181381	-0.156865	0.590971	-0.30088	0.000947403	-0.148536	0.344546	set2
CBR4	CBR4	ENSG00000145439	-0.181337	0.379864	-0.400545	3.32046e-06	-0.223695	0.0448664	set1
CLCN3	CLCN3	ENSG00000109572	-0.21517	0.131207	-0.296989	0.000170492	-0.0863833	0.644188	set2
	AC105285.1	ENSG00000245213	-0.299108	0.73667	-0.552202	0.0317919	-0.25855	0.639512	set2
	AC097534.1	ENSG00000248774	-0.460029	0.525664	-0.721612	0.0262462	-0.265859	0.709449	set2
CEP44	CEP44	ENSG00000164118	-0.067451	0.930941	-0.248857	0.0457134	-0.186026	0.221881	set2
NEIL3	NEIL3	ENSG00000109674	-0.135741	0.672955	-0.260807	0.0107377	-0.129258	0.440961	set2
ING2	ING2	ENSG00000168556	0.250383	0.303669	0.516005	5.55044e-05	0.260977	0.205002	set2
PRIMPOL	PRIMPOL	ENSG00000164306	-0.24327	0.425277	-0.372694	0.0208276	-0.133931	0.707155	set2
ACSL1	ACSL1	ENSG00000151726	-0.295001	0.00686808	-0.407562	1.28201e-05	-0.117122	0.529817	set3
AHRR	AHRR	ENSG00000063438	0.410618	0.00338028	0.44543	1.40345e-06	0.0299182	0.94406	set3
EXOC3	EXOC3	ENSG00000180104	0.180631	0.232523	0.281043	0.000167085	0.095553	0.533912	set2
CEP72	CEP72	ENSG00000112877	0.3575	0.00433059	0.194448	0.109925	-0.167976	0.170652	set3
BRD9	BRD9	ENSG00000028310	0.189843	0.227201	0.330262	7.59756e-05	0.135645	0.331676	set2
SLC12A7	SLC12A7	ENSG00000113504	0.531469	0.000311025	0.527727	1.00266e-05	-0.00876207	0.987579	set3
PAPD7	PAPD7	ENSG00000112941	0.20729	0.239331	0.30453	0.000416063	0.0923689	0.682281	set2
FAM173B	FAM173B	ENSG00000150756	-0.0851457	0.891678	-0.312464	0.00818432	-0.231814	0.123219	set2
ANKRD33B	ANKRD33B	ENSG00000164236	0.461724	0.000377903	0.407218	1.626e-05	-0.0592986	0.845337	set3
FAM105A	FAM105A	ENSG00000145569	-0.0760373	0.941392	0.374127	0.0224029	0.445717	0.00336929	set1
BASP1	BASP1	ENSG00000176788	-0.2592	0.066803	-0.21248	0.0304454	0.0419466	0.872836	set2
TARS	TARS	ENSG00000113407	0.0603022	0.900087	0.168948	0.029553	0.104165	0.404328	set2
SPEF2	SPEF2	ENSG00000152582	-0.467284	0.020011	-0.425918	0.00152359	0.0370151	0.945619	set3
IL7R	IL7R	ENSG00000168685	-0.519185	0.0010349	-0.766473	1.68657e-11	-0.251435	0.0528296	set3
SKP2	SKP2	ENSG00000145604	-0.072208	0.881124	-0.195946	0.0411465	-0.128264	0.361272	set2
RICTOR	RICTOR	ENSG00000164327	0.225763	0.161501	0.309784	0.00104608	0.0795679	0.644188	set2
FYB1	FYB1	ENSG00000082074	-0.198843	0.203597	-0.245139	0.00410947	-0.0509704	0.735469	set2
GOLGA5P1	GOLGA5P1	ENSG00000251215	-0.229535	0.890445	-0.778692	0.00975744	-0.554288	0.207169	set2
PTGER4	PTGER4	ENSG00000171522	-0.0310611	0.984555	1.26226	2.16739e-08	1.28979	1.65538e-08	set1
ZNF131	ZNF131	ENSG00000172262	0.112611	0.678005	0.185241	0.034669	0.0680664	0.753175	set2
C5orf34	C5orf34	ENSG00000172244	-0.103346	0.94522	-0.506911	0.0113398	-0.408132	0.168887	set2
NNT-AS1	NNT-AS1	ENSG00000248092	-0.200906	0.655219	-0.521009	0.000291186	-0.324955	0.0554178	set2
	AC093297.2	ENSG00000272335	-0.0777143	0.948397	-0.390891	0.0248275	-0.317817	0.178914	set2
SNX18	SNX18	ENSG00000178996	-0.452709	0.0150709	-0.724014	2.28623e-09	-0.276788	0.0471171	set1
IL31RA	IL31RA	ENSG00000164509	-0.538943	0.300291	-0.74284	0.0101986	-0.208748	0.78227	set2
IL6ST	IL6ST	ENSG00000134352	0.218603	0.331964	0.258675	0.0252943	0.035919	0.909249	set2
RAB3C	RAB3C	ENSG00000152932	-0.316989	0.206503	-0.445803	0.00197507	-0.132994	0.659361	set2
PDE4D	PDE4D	ENSG00000113448	-0.0270104	0.976359	0.346291	0.00156701	0.368808	0.00124721	set1
SREK1	SREK1	ENSG00000153914	0.0881023	0.795906	0.258424	0.00150459	0.16578	0.0715952	set2
CD180	CD180	ENSG00000134061	-0.162649	0.845689	-0.44405	0.0225574	-0.286183	0.239393	set2
PTCD2	PTCD2	ENSG00000049883	-0.257857	0.593935	-0.429671	0.0181119	-0.175763	0.656095	set2
HMGCR	HMGCR	ENSG00000113161	-0.264224	0.179765	-0.277455	0.0214691	-0.0174224	0.964305	set2
ATP6AP1L	ATP6AP1L	ENSG00000205464	-0.237946	0.887858	-0.701822	0.0382962	-0.468651	0.35264	set2
CCNH	CCNH	ENSG00000134480	0.145878	0.532928	0.211965	0.0295138	0.0616559	0.790765	set2
ARRDC3	ARRDC3	ENSG00000113369	-0.32884	0.440041	-0.838161	8.3413e-07	-0.513025	0.00783412	set1
MCTP1	MCTP1	ENSG00000175471	0.296936	0.0725203	0.303747	0.00480992	0.00244544	0.996163	set2
SPATA9	SPATA9	ENSG00000145757	0.0795696	0.95258	-0.43623	0.0128027	-0.520858	0.00944953	set1
HSPD1P11	HSPD1P11	ENSG00000251348	0.534057	0.232352	0.517305	0.0436666	-0.0219367	0.987355	set2
GIN1	GIN1	ENSG00000145723	-0.164745	0.88124	-0.430026	0.0433271	-0.270172	0.445314	set2
NREP	NREP	ENSG00000134986	-0.185727	0.485183	-0.289194	0.0133682	-0.108259	0.651953	set2
SNX2	SNX2	ENSG00000205302	0.0216875	0.984372	0.276238	0.0103833	0.250282	0.0893458	set2
LMNB1	LMNB1	ENSG00000113368	-0.210147	0.323476	-0.206114	0.0238607	-0.000801513	0.998683	set2
C5orf63	C5orf63	ENSG00000164241	-0.179776	0.790382	-0.423463	0.0152337	-0.248147	0.372318	set2
LYRM7	LYRM7	ENSG00000186687	-0.196332	0.490214	-0.291903	0.0278338	-0.100001	0.745162	set2
SLC22A4	SLC22A4	ENSG00000197208	0.189458	0.800367	0.546263	0.0206298	0.351935	0.348634	set2
C5orf56	C5orf56	ENSG00000197536	-0.329407	0.107258	-0.482803	7.3235e-05	-0.15802	0.42551	set2
	AC116366.2	ENSG00000238160	-0.104133	0.94522	-0.601287	0.00727586	-0.501721	0.0572397	set2
IRF1	IRF1	ENSG00000125347	0.157067	0.391769	-0.328046	3.0922e-07	-0.489984	1.03375e-13	set1
AFF4	AFF4	ENSG00000072364	0.0715045	0.856495	0.21507	0.00833289	0.138931	0.20842	set2
TCF7	TCF7	ENSG00000081059	0.275575	0.687403	1.0342	8.47465e-06	0.754062	0.0065787	set1
PPP2CA	PPP2CA	ENSG00000113575	0.0895482	0.822455	0.212934	0.0344119	0.118926	0.487892	set2
BRD8	BRD8	ENSG00000112983	-0.0689863	0.938449	-0.272891	0.0327437	-0.20825	0.256433	set2
KIF20A	KIF20A	ENSG00000112984	-0.296985	0.112649	-0.295103	0.0219277	-0.00285327	0.996163	set2
FAM53C	FAM53C	ENSG00000120709	-0.0581533	0.941392	0.334217	0.000687236	0.387601	0.000226519	set1
EGR1	EGR1	ENSG00000120738	0.117041	0.958068	3.87697	4.07317e-41	3.75449	0	set1
ETF1	ETF1	ENSG00000120705	0.073521	0.859542	0.368723	2.3176e-07	0.290699	0.000124061	set1
HSPA9	HSPA9	ENSG00000113013	0.0324283	0.960721	0.177834	0.0358228	0.140826	0.118203	set2
SNHG4	SNHG4	ENSG00000281398	0.783359	0.00299478	1.20991	1.81309e-09	0.42254	0.229359	set3
TMEM173	TMEM173	ENSG00000184584	-0.459247	0.00491977	-0.609169	2.31478e-09	-0.155084	0.454773	set3
PURA	PURA	ENSG00000185129	-0.00195496	0.998202	-0.2436	0.0205338	-0.246682	0.069235	set2
HBEGF	HBEGF	ENSG00000113070	-0.333902	0.377036	-0.586675	0.000141751	-0.258036	0.338636	set2
APBB3	APBB3	ENSG00000113108	-0.294679	0.403129	-0.585176	0.00120243	-0.29532	0.301292	set2
ARHGAP26	ARHGAP26	ENSG00000145819	0.285141	0.012927	0.418259	1.74117e-08	0.128437	0.301228	set3
NR3C1	NR3C1	ENSG00000113580	0.0723504	0.858821	0.197685	0.021009	0.120755	0.355224	set2
PCYOX1L	PCYOX1L	ENSG00000145882	-0.246673	0.19776	-0.535539	2.44165e-09	-0.294089	0.000967486	set1
CARMN	CARMN	ENSG00000249669	0.220861	0.916694	-0.974606	0.000730955	-1.19845	8.36437e-06	set1
CSF1R	CSF1R	ENSG00000182578	-0.237678	0.222765	-0.354924	0.00104107	-0.122092	0.61914	set2
DCTN4	DCTN4	ENSG00000132912	0.0311489	0.963655	0.183469	0.0377815	0.147852	0.155708	set2
SMIM3	SMIM3	ENSG00000256235	0.116537	0.687564	0.366995	1.4366e-05	0.245745	0.0302701	set1
CCDC69	CCDC69	ENSG00000198624	0.344238	0.00180766	0.501607	3.52739e-11	0.152853	0.223872	set3
SLC36A1	SLC36A1	ENSG00000123643	-0.0830123	0.840029	-0.173812	0.0325865	-0.0957089	0.542735	set2
CYFIP2	CYFIP2	ENSG00000055163	-0.172372	0.51086	-0.212082	0.0484521	-0.044678	0.886787	set2
SLU7	SLU7	ENSG00000164609	0.0717516	0.889958	0.201361	0.0430194	0.125048	0.360853	set2
HMMR	HMMR	ENSG00000072571	-0.271657	0.0793885	-0.281279	0.00722546	-0.0140014	0.960472	set2
MAT2B	MAT2B	ENSG00000038274	-0.127866	0.695382	-0.222229	0.0252943	-0.09862	0.588888	set2
RPL10P9	RPL10P9	ENSG00000233913	-0.32565	0.149523	-0.539995	5.63852e-07	-0.218794	0.347204	set2
LCP2	LCP2	ENSG00000043462	0.0850124	0.728657	0.242215	0.000441834	0.152558	0.0865267	set2
NPM1	NPM1	ENSG00000181163	0.0893044	0.753896	0.171453	0.0261119	0.0775546	0.472193	set2
CREBRF	CREBRF	ENSG00000164463	0.411698	0.0256593	0.550955	8.47734e-06	0.134921	0.504008	set3
CPEB4	CPEB4	ENSG00000113742	0.0836712	0.782356	0.283871	0.000234717	0.195584	0.0424475	set1
HRH2	HRH2	ENSG00000113749	-0.258776	0.330593	-0.517441	6.67672e-06	-0.263748	0.178914	set2
NOP16	NOP16	ENSG00000048162	0.0513518	0.948174	0.266123	0.0237538	0.210289	0.203829	set2
HK3	HK3	ENSG00000160883	-0.119115	0.805408	-0.277676	0.0236724	-0.163348	0.0918225	set2
NSD1	NSD1	ENSG00000165671	-0.181005	0.179765	-0.168242	0.0130227	0.00799116	0.977579	set2
GRK6	GRK6	ENSG00000198055	0.226774	0.182999	0.223559	0.0134809	-0.00818692	0.982958	set2
PDLIM7	PDLIM7	ENSG00000196923	0.407036	0.000276575	0.494297	1.88924e-08	0.082512	0.657716	set3
HNRNPAB	HNRNPAB	ENSG00000197451	-0.0292237	0.966925	0.207194	0.00204264	0.231658	0.0162656	set1
HNRNPH1	HNRNPH1	ENSG00000169045	0.0291707	0.963655	0.14623	0.0357967	0.112462	0.35264	set2
SQSTM1	SQSTM1	ENSG00000161011	0.369408	0.00299478	0.534029	4.54464e-10	0.159809	0.237187	set3
LINC00847	LINC00847	ENSG00000245060	-0.29201	0.485183	-0.700818	4.44908e-05	-0.413709	0.0639075	set2
ZFP62	ZFP62	ENSG00000196670	-0.0675184	0.930941	-0.409427	0.000434105	-0.346408	0.0068534	set1
	AC008443.1	ENSG00000233937	0.0975963	0.94522	0.522958	0.0168102	0.420873	0.16928	set2
GMDS-AS1	GMDS-AS1	ENSG00000250903	-0.0637698	0.930941	-0.303726	0.00229132	-0.244595	0.0841507	set2
RIPK1	RIPK1	ENSG00000137275	-0.0164258	0.984372	0.227673	0.0109615	0.239445	0.0110873	set1
NRN1	NRN1	ENSG00000124785	-0.300955	0.281325	-0.433386	0.00450643	-0.137005	0.695566	set2
RREB1	RREB1	ENSG00000124782	0.0885812	0.868319	0.181706	0.0426755	0.0882106	0.685048	set2
RIOK1	RIOK1	ENSG00000124784	0.0698964	0.907587	0.251942	0.0182877	0.177627	0.193686	set2
SLC35B3	SLC35B3	ENSG00000124786	-0.0822468	0.88124	-0.232392	0.0189102	-0.154664	0.340653	set2
PAK1IP1	PAK1IP1	ENSG00000111845	0.0885762	0.889958	0.259383	0.0299416	0.166574	0.437505	set2
MAK	MAK	ENSG00000111837	0.0697189	0.974255	1.82536	6.57064e-08	1.75168	1.91607e-06	set1
NEDD9	NEDD9	ENSG00000111859	0.19548	0.214606	0.394591	6.32889e-05	0.194407	0.208485	set2
HIVEP1	HIVEP1	ENSG00000095951	1.27402	0.000201559	1.55408	3.53816e-25	0.277792	0.412733	set3
PHACTR1	PHACTR1	ENSG00000112137	0.359212	0.042876	0.448399	0.000416063	0.0848802	0.745613	set3
SIRT5	SIRT5	ENSG00000124523	-0.178387	0.6393	-0.412565	0.000823598	-0.239091	0.12354	set2
MCUR1	MCUR1	ENSG00000050393	0.0878602	0.887858	0.234111	0.0370356	0.14178	0.542389	set2
CD83	CD83	ENSG00000112149	1.00248	1.25597e-06	1.69458	1.34854e-19	0.687537	0.00641276	set1
MYLIP	MYLIP	ENSG00000007944	-0.0209509	0.984555	-0.439276	0.000216929	-0.423108	0.00181439	set1
NUP153	NUP153	ENSG00000124789	0.0872468	0.795906	0.288561	7.26253e-05	0.196614	0.0195245	set1
SOX4	SOX4	ENSG00000124766	-0.427849	0.00433059	-0.528133	3.8484e-07	-0.105171	0.483096	set3
HIST1H4B	HIST1H4B	ENSG00000278705	0.278682	0.00345231	-0.206399	0.00206128	-0.489792	1.62842e-16	set1
HIST1H2BB	HIST1H2BB	ENSG00000276410	0.291911	0.11695	-0.294234	0.000224324	-0.590711	3.03256e-09	set1
HIST1H4D	HIST1H4D	ENSG00000277157	-0.0132274	0.985662	-0.290153	0.00415924	-0.281754	0.0107349	set1
BTN3A2	BTN3A2	ENSG00000186470	-0.225087	0.204601	-0.31974	0.00114201	-0.0992129	0.655068	set2
BTN3A1	BTN3A1	ENSG00000026950	-0.407301	0.0383264	-0.556141	1.66164e-05	-0.153485	0.557468	set3
BTN3A3	BTN3A3	ENSG00000111801	-0.444051	0.0737184	-0.675487	6.51496e-06	-0.235881	0.393591	set2
BTN2A1	BTN2A1	ENSG00000112763	0.14052	0.549397	0.279363	0.00112273	0.134434	0.372224	set2
HIST1H2BK	HIST1H2BK	ENSG00000197903	0.0500796	0.930941	-0.164359	0.0393035	-0.219122	0.0321055	set1
HIST1H4K	HIST1H4K	ENSG00000273542	0.0426101	0.984555	-0.459109	1.6299e-09	-0.506499	0.114301	set2
HIST1H4L	HIST1H4L	ENSG00000275126	-0.0236306	0.981555	-0.405622	3.07108e-07	-0.38683	0.000335803	set1
HIST1H3J	HIST1H3J	ENSG00000197153	0.461531	0.000110441	-0.188859	0.0481872	-0.654981	1.23546e-17	set1
HIST1H2BO	HIST1H2BO	ENSG00000274641	0.296584	0.0232974	-0.180027	0.0484521	-0.481255	8.14015e-11	set1
ZNF192P1	ZNF192P1	ENSG00000226314	-0.1345	0.895851	-0.50483	0.00579661	-0.375091	0.0841507	set2
	AL022393.1	ENSG00000280107	-0.375119	0.762342	-0.802794	0.0327437	-0.432316	0.536816	set2
ZKSCAN3	ZKSCAN3	ENSG00000189298	-0.200709	0.613818	-0.685692	1.12113e-07	-0.489427	0.000253941	set1
ZSCAN23	ZSCAN23	ENSG00000187987	-0.0535725	0.972446	-0.566147	0.000575625	-0.51649	0.00834156	set1
ZNF311	ZNF311	ENSG00000197935	-0.313652	0.51086	-0.560475	0.00952849	-0.251103	0.52557	set2
ZNRD1ASP	ZNRD1ASP	ENSG00000204623	-0.272306	0.0958027	-0.568307	1.95927e-10	-0.300592	0.00464613	set1
	AL662795.2	ENSG00000280128	-0.0588969	0.946576	-0.270856	0.0232542	-0.216408	0.226856	set2
GNL1	GNL1	ENSG00000204590	0.192104	0.290179	0.357681	8.08453e-05	0.16088	0.329249	set2
PPP1R10	PPP1R10	ENSG00000204569	-0.225127	0.171159	-0.436686	3.39015e-09	-0.21647	0.0659782	set2
MDC1	MDC1	ENSG00000137337	-0.204189	0.40144	-0.199487	0.0240095	-0.000383605	0.999178	set2
IER3	IER3	ENSG00000137331	1.14665	0.00989054	2.58327	2.66885e-14	1.43035	0.0183009	set1
DDX39B	DDX39B	ENSG00000198563	0.114145	0.595698	0.247357	0.000356605	0.128598	0.28672	set2
TNF	TNF	ENSG00000232810	0.933308	0.00262429	3.4359	4.6584e-43	2.49785	1.17884e-22	set1
CSNK2B	CSNK2B	ENSG00000204435	0.0280035	0.970695	0.202762	0.0416572	0.170089	0.208802	set2
LY6G5B	LY6G5B	ENSG00000240053	0.475796	0.03997	0.850889	4.03432e-07	0.370484	0.209073	set3
ABHD16A	ABHD16A	ENSG00000204427	0.143135	0.868319	0.419281	0.0303863	0.271523	0.396661	set2
DDAH2	DDAH2	ENSG00000213722	0.259092	0.142699	0.356424	0.00229929	0.0927428	0.759846	set2
CLIC1	CLIC1	ENSG00000213719	0.160759	0.274343	0.260322	0.00016923	0.0950048	0.341202	set2
STK19	STK19	ENSG00000204344	0.0729835	0.941392	0.321725	0.0439674	0.244046	0.311047	set2
AGPAT1	AGPAT1	ENSG00000204310	-0.246803	0.3176	-0.310255	0.00766295	-0.0686302	0.833547	set2
BRD2	BRD2	ENSG00000204256	-0.00670752	0.989774	0.189533	0.00378388	0.191497	0.00816503	set1
COL11A2	COL11A2	ENSG00000204248	0.523598	0.194418	0.558643	0.0394535	0.030347	0.977489	set2
B3GALT4	B3GALT4	ENSG00000235863	-0.346917	0.580297	-0.615314	0.0374286	-0.272743	0.634585	set2
PHF1	PHF1	ENSG00000112511	0.342068	0.0404303	0.620081	2.71733e-08	0.273335	0.115426	set3
ZNF76	ZNF76	ENSG00000065029	-0.0582781	0.952059	-0.333027	0.00839961	-0.279505	0.0551154	set2
PPARD	PPARD	ENSG00000112033	-0.221261	0.558716	-0.319021	0.0315443	-0.103441	0.760119	set2
TEAD3	TEAD3	ENSG00000007866	0.535253	0.0485264	0.598412	0.00215757	0.0587134	0.931321	set3
STK38	STK38	ENSG00000112079	-0.0726322	0.867556	-0.214221	0.0154956	-0.146117	0.249877	set2
KCNK17	KCNK17	ENSG00000124780	-0.237771	0.366851	-0.43384	0.000313248	-0.201139	0.0885854	set2
DAAM2	DAAM2	ENSG00000146122	-0.455528	0.0193039	-0.705205	1.56276e-08	-0.254854	0.0843556	set3
TREM1	TREM1	ENSG00000124731	0.365174	0.727781	2.36055	1.75486e-11	1.98887	6.78948e-06	set1
FOXP4	FOXP4	ENSG00000137166	0.185679	0.633063	0.253004	0.0261823	0.0623025	0.881258	set2
BYSL	BYSL	ENSG00000112578	0.15867	0.737745	0.34747	0.0209582	0.183901	0.504818	set2
BICRAL	BICRAL	ENSG00000112624	-0.163867	0.545204	-0.24785	0.0207584	-0.0885791	0.700589	set2
	AL035587.1	ENSG00000231113	0.243224	0.315055	0.344613	0.0089886	0.0965734	0.786581	set2
SRF	SRF	ENSG00000112658	0.0891337	0.858821	0.511879	1.10482e-10	0.417678	3.04162e-06	set1
MAD2L1BP	MAD2L1BP	ENSG00000124688	0.031799	0.973928	0.26638	0.0234841	0.23012	0.199606	set2
VEGFA	VEGFA	ENSG00000112715	0.56122	0.00466974	0.790579	3.55641e-08	0.225546	0.349969	set3
SLC29A1	SLC29A1	ENSG00000112759	-0.15335	0.495297	-0.210985	0.00969759	-0.0625438	0.762424	set2
NFKBIE	NFKBIE	ENSG00000146232	0.332511	0.00842364	0.460281	7.30963e-07	0.123176	0.520993	set3
PAQR8	PAQR8	ENSG00000170915	-0.593856	0.273213	-1.04982	0.000121439	-0.460626	0.277634	set2
FAM135A	FAM135A	ENSG00000082269	-0.110051	0.714946	-0.182705	0.0473718	-0.0770975	0.713107	set2
KCNQ5-IT1	KCNQ5-IT1	ENSG00000233844	0.44209	0.0670785	0.520742	0.00162942	0.0745156	0.883943	set2
	AL080250.1	ENSG00000225793	-0.289386	0.752635	-0.661852	0.0120337	-0.377182	0.363023	set2
FAM46A	FAM46A	ENSG00000112773	-0.325952	0.000186152	-0.683106	3.2496e-22	-0.361752	2.42659e-06	set1
ME1	ME1	ENSG00000065833	0.561602	0.0343792	0.479144	0.0342668	-0.0871453	0.907478	set3
SYNCRIP	SYNCRIP	ENSG00000135316	0.0317173	0.95258	0.19953	0.00185094	0.163198	0.0153557	set1
ZNF292	ZNF292	ENSG00000188994	0.186613	0.233775	0.215334	0.0117932	0.0241966	0.918103	set2
PNRC1	PNRC1	ENSG00000146278	0.0728211	0.874645	0.244531	0.00504708	0.167003	0.161682	set2
GABRR2	GABRR2	ENSG00000111886	1.17048	0.000505921	1.26007	1.57434e-05	0.0853081	0.942294	set3
UBE2J1	UBE2J1	ENSG00000198833	0.240839	0.0411988	0.30124	5.52513e-05	0.0558959	0.745162	set3
MANEA-AS1	MANEA-AS1	ENSG00000261366	-0.0769212	0.972466	-0.58473	0.0358049	-0.512185	0.145819	set2
PREP	PREP	ENSG00000085377	-0.159604	0.469385	-0.215156	0.0169544	-0.0603861	0.813241	set2
PRDM1	PRDM1	ENSG00000057657	0.227905	0.110427	0.948606	2.87273e-27	0.715933	9.07355e-17	set1
CRYBG1	CRYBG1	ENSG00000112297	-0.176652	0.183505	-0.315074	4.9915e-06	-0.143065	0.190851	set2
RTN4IP1	RTN4IP1	ENSG00000130347	-0.227611	0.663284	-0.450221	0.011411	-0.227317	0.48263	set2
C6orf203	C6orf203	ENSG00000130349	-0.28486	0.340497	-0.40542	0.0103303	-0.12547	0.7277	set2
SOBP	SOBP	ENSG00000112320	0.198272	0.57857	0.564189	8.42339e-05	0.361347	0.0471171	set1
SMPD2	SMPD2	ENSG00000135587	0.0910266	0.920189	0.598911	6.14542e-05	0.503216	0.00240586	set1
AK9	AK9	ENSG00000155085	-0.305979	0.506216	-0.462826	0.0286487	-0.161226	0.732794	set2
AMD1	AMD1	ENSG00000123505	0.0252563	0.968868	0.201362	0.00509628	0.171638	0.0466013	set1
REV3L	REV3L	ENSG00000009413	0.250087	0.0283241	0.327782	2.57698e-06	0.0732528	0.679033	set3
TUBE1	TUBE1	ENSG00000074935	0.021103	0.984958	-0.302441	0.0374286	-0.32778	0.0248638	set1
DSE	DSE	ENSG00000111817	0.0809199	0.895451	0.273849	0.0187016	0.188405	0.174319	set2
GOPC	GOPC	ENSG00000047932	-0.0669816	0.889958	-0.189996	0.0287131	-0.12778	0.363023	set2
	Z99129.3	ENSG00000279114	-0.293822	0.768751	-0.936157	0.000135722	-0.646817	0.0246843	set1
NCOA7	NCOA7	ENSG00000111912	0.127112	0.782356	1.14743	3.19134e-43	1.01581	4.01525e-24	set1
TRMT11	TRMT11	ENSG00000066651	0.168142	0.447398	0.213875	0.0468466	0.0411542	0.888764	set2
RNF146	RNF146	ENSG00000118518	-0.130676	0.695556	-0.26735	0.00427689	-0.140927	0.39876	set2
MYB	MYB	ENSG00000118513	-0.282954	0.0533762	-0.515762	0.0049532	-0.237346	0.0607305	set2
BCLAF1	BCLAF1	ENSG00000029363	0.0122093	0.985597	0.256523	0.00130065	0.239785	3.89439e-05	set1
TNFAIP3	TNFAIP3	ENSG00000118503	0.588009	2.76286e-06	1.64094	2.15929e-63	1.04819	3.43111e-20	set1
	AL590617.1	ENSG00000216802	0.754864	0.179765	0.771281	0.0425289	0.0114237	0.99585	set2
HECA	HECA	ENSG00000112406	0.299468	0.0205536	0.611925	3.55084e-12	0.307885	0.00105689	set1
LTV1	LTV1	ENSG00000135521	0.239246	0.182409	0.523965	2.6977e-08	0.280076	0.0140611	set1
PLAGL1	PLAGL1	ENSG00000118495	0.213197	0.13006	0.196129	0.0179161	-0.0218071	0.942771	set2
STX11	STX11	ENSG00000135604	0.556804	0.0914237	0.836672	0.000338201	0.2751	0.643179	set2
	AL023806.3	ENSG00000280184	0.510356	0.207744	0.610591	0.0295878	0.0956357	0.913483	set2
	AL356599.1	ENSG00000235652	-0.189306	0.907587	-0.666577	0.0225574	-0.482118	0.236772	set2
ZC3H12D	ZC3H12D	ENSG00000178199	-0.378287	0.036509	-0.613517	9.1291e-07	-0.23985	0.178914	set3
PPIL4	PPIL4	ENSG00000131013	0.252694	0.075581	0.440204	1.19525e-08	0.18314	0.119676	set2
ZBTB2	ZBTB2	ENSG00000181472	0.0820963	0.890125	0.429386	4.59759e-05	0.342867	0.000243337	set1
CNKSR3	CNKSR3	ENSG00000153721	0.303366	0.396786	0.528494	0.00353777	0.220509	0.540058	set2
SNX9	SNX9	ENSG00000130340	0.0434613	0.952186	0.255952	0.00504708	0.207901	0.0783877	set2
TULP4	TULP4	ENSG00000130338	-0.15989	0.451998	-0.218439	0.0242882	-0.063371	0.803171	set2
TAGAP	TAGAP	ENSG00000164691	-0.43551	6.59877e-05	-0.347013	7.3388e-05	0.0838209	0.631027	set3
ERMARD	ERMARD	ENSG00000130023	-0.179036	0.334979	-0.322233	0.00010663	-0.147693	0.298786	set2
	AL354892.3	ENSG00000266896	-0.222004	0.859542	-0.603887	0.0245074	-0.386539	0.335197	set2
	AC093627.4	ENSG00000240859	-0.212209	0.239331	-0.40144	9.57273e-06	-0.193969	0.13767	set2
ADAP1	ADAP1	ENSG00000105963	0.229729	0.425537	0.3347	0.0201335	0.10021	0.77732	set2
MAFK	MAFK	ENSG00000198517	0.176676	0.464475	0.386316	0.000141751	0.204811	0.12151	set2
PSMG3-AS1	PSMG3-AS1	ENSG00000230487	-0.283822	0.670728	-0.47731	0.0352109	-0.199406	0.669519	set2
	AC104129.1	ENSG00000176349	-0.362932	0.294119	-0.517167	0.00659221	-0.159215	0.741949	set2
FSCN1	FSCN1	ENSG00000075618	0.688275	0.0134823	0.904125	2.29574e-05	0.211499	0.719211	set3
CYTH3	CYTH3	ENSG00000008256	0.21152	0.569667	0.633778	1.97668e-05	0.417555	0.0263214	set1
FAM220A	FAM220A	ENSG00000178397	-0.413636	0.0765542	-0.416121	0.0131617	-0.00744689	0.991435	set2
DAGLB	DAGLB	ENSG00000164535	0.116651	0.722974	0.335061	0.000593818	0.21358	0.0570553	set2
ZNF12	ZNF12	ENSG00000164631	0.105469	0.755406	0.205671	0.0389416	0.0956393	0.648201	set2
GLCCI1	GLCCI1	ENSG00000106415	0.208825	0.343626	0.339577	0.00174538	0.126061	0.611865	set2
TMEM106B	TMEM106B	ENSG00000106460	-0.0767489	0.890125	-0.204588	0.0453448	-0.132126	0.428785	set2
ARL4A	ARL4A	ENSG00000122644	0.303257	0.469107	0.96312	1.99037e-09	0.655525	0.00696973	set1
ANKMY2	ANKMY2	ENSG00000106524	0.145712	0.687564	0.263394	0.043823	0.113067	0.630773	set2
SNHG26	SNHG26	ENSG00000228649	-0.00384171	0.998146	0.571788	0.00189437	0.570888	0.00275407	set1
IGF2BP3	IGF2BP3	ENSG00000136231	0.183744	0.233518	0.213313	0.00888851	0.0250474	0.924602	set2
SKAP2	SKAP2	ENSG00000005020	-0.156561	0.316128	-0.198098	0.00334618	-0.0460651	0.816172	set2
HOXA5	HOXA5	ENSG00000106004	0.346885	0.185927	0.473432	0.00504708	0.12187	0.798405	set2
SCRN1	SCRN1	ENSG00000136193	-0.176065	0.931739	-0.749355	0.0232542	-0.577779	0.193686	set2
MTURN	MTURN	ENSG00000180354	0.310508	0.0669415	1.05602	4.55863e-41	0.741099	1.38331e-12	set1
	AC007036.2	ENSG00000230751	0.242493	0.88211	1.28254	0.000761296	1.03591	0.045418	set1
RPS27P16	RPS27P16	ENSG00000225907	0.290357	0.867556	1.24471	0.00385727	0.949182	0.137954	set2
	AC005154.1	ENSG00000196295	-0.112804	0.713816	-0.308266	1.10283e-05	-0.200045	0.0636856	set2
GARS	GARS	ENSG00000106105	0.0637815	0.901022	0.198931	0.035944	0.130561	0.278886	set2
KBTBD2	KBTBD2	ENSG00000170852	0.132663	0.541673	0.438282	7.38157e-09	0.301056	0.000226519	set1
RP9P	RP9P	ENSG00000205763	0.608809	0.0697204	0.623126	0.0187016	0.0097654	0.99462	set2
SEPT7-AS1	SEPT7-AS1	ENSG00000228878	-0.223476	0.890125	-0.673125	0.0302574	-0.453781	0.347204	set2
GPR141	GPR141	ENSG00000187037	-0.178411	0.399528	-0.355121	1.6083e-05	-0.181148	0.174769	set2
NME8	NME8	ENSG00000086288	-0.185462	0.60678	-0.427547	0.00030472	-0.246815	0.155708	set2
TRGC2	TRGC2	ENSG00000227191	0.240304	0.54657	0.76972	2.41418e-07	0.524977	0.00477261	set1
TRGJ2	TRGJ2	ENSG00000211687	0.00214333	0.999398	1.41615	0.0001094	1.40973	0.000225596	set1
TRGJP2	TRGJP2	ENSG00000211688	0.115083	0.954012	0.942253	0.00587546	0.822542	0.0868619	set2
TRGC1	TRGC1	ENSG00000211689	0.299582	0.110427	1.01814	5.1729e-28	0.71427	1.07516e-11	set1
TRGJ1	TRGJ1	ENSG00000211690	-0.0744956	0.975604	1.48117	2.22619e-05	1.55132	1.79559e-05	set1
TRGJP	TRGJP	ENSG00000211691	-0.102134	0.959789	1.62657	2.32399e-06	1.72386	3.40866e-07	set1
TRGJP1	TRGJP1	ENSG00000211692	0.227382	0.795906	0.917283	0.00012076	0.685133	0.0383409	set1
TRG-AS1	TRG-AS1	ENSG00000281103	0.426304	0.198799	0.521904	0.00964184	0.0920465	0.861327	set2
RALA	RALA	ENSG00000006451	0.296352	0.0840249	0.30806	0.00714228	0.007145	0.989473	set2
STK17A	STK17A	ENSG00000164543	-0.197892	0.41633	-0.311441	0.0034881	-0.118095	0.406662	set2
COA1	COA1	ENSG00000106603	-0.0761359	0.868319	-0.230709	0.00909638	-0.159241	0.209723	set2
URGCP	URGCP	ENSG00000106608	-0.216101	0.652201	-0.528368	0.000692728	-0.316962	0.132966	set2
RASA4CP	RASA4CP	ENSG00000228903	0.00968936	0.998146	-0.784588	0.048504	-0.797545	0.10676	set2
NUDCD3	NUDCD3	ENSG00000015676	-0.140583	0.664208	-0.236125	0.0267701	-0.100514	0.631855	set2
PURB	PURB	ENSG00000146676	0.0896735	0.754383	0.256133	0.000253127	0.161716	0.0712265	set2
CCM2	CCM2	ENSG00000136280	-0.0593853	0.924295	-0.229729	0.017479	-0.175276	0.181675	set2
UPP1	UPP1	ENSG00000183696	0.850042	0.0150709	0.631232	0.0232542	-0.223851	0.791373	set3
ABCA13	ABCA13	ENSG00000179869	-0.183428	0.652201	-0.319117	0.045001	-0.140591	0.644188	set2
LANCL2	LANCL2	ENSG00000132434	0.0536019	0.952186	0.28683	0.0238134	0.228568	0.218906	set2
ZNF138	ZNF138	ENSG00000197008	-0.113624	0.889958	-0.435101	0.00351571	-0.326436	0.053498	set2
LINC00174	LINC00174	ENSG00000179406	-0.26476	0.232352	-0.432205	0.000424165	-0.172249	0.389421	set2
KCTD7	KCTD7	ENSG00000243335	-0.285152	0.490214	-0.445923	0.0122164	-0.165771	0.622723	set2
TYW1B	TYW1B	ENSG00000277149	-0.164582	0.589825	-0.307835	0.00538669	-0.147774	0.47468	set2
STAG3L3	STAG3L3	ENSG00000174353	0.472056	9.0484e-07	0.27114	7.88954e-05	-0.205504	0.084466	set3
GTF2IRD2P1	GTF2IRD2P1	ENSG00000214544	-0.282363	0.680504	-0.525245	0.0405088	-0.247713	0.635238	set2
BCL7B	BCL7B	ENSG00000106635	0.186137	0.359108	0.246206	0.00741976	0.0552758	0.84892	set2
TBL2	TBL2	ENSG00000106638	0.10432	0.720689	-0.257271	0.000957688	-0.366278	3.09519e-07	set1
CLIP2	CLIP2	ENSG00000106665	0.164834	0.506338	0.212527	0.0134634	0.0427834	0.89662	set2
GTF2IRD1	GTF2IRD1	ENSG00000006704	0.364465	0.091088	0.3976	0.00240778	0.0280676	0.958088	set2
NCF1	NCF1	ENSG00000158517	-0.141754	0.631341	-0.213274	0.0183396	-0.0763132	0.68905	set2
STAG3L2	STAG3L2	ENSG00000277072	0.257453	0.0649797	0.270655	0.00180979	0.00867892	0.983664	set2
STAG3L1	STAG3L1	ENSG00000205583	0.449668	4.39317e-06	0.318708	0.000170836	-0.135526	0.485864	set3
RPL7L1P3	RPL7L1P3	ENSG00000235090	0.143997	0.887858	-0.44634	0.00766295	-0.594833	0.00105689	set1
POMZP3	POMZP3	ENSG00000146707	0.549941	0.00299478	0.268849	0.120378	-0.285625	0.213813	set3
GTPBP10	GTPBP10	ENSG00000105793	-0.098553	0.844323	-0.243416	0.0340684	-0.14918	0.362544	set2
PEX1	PEX1	ENSG00000127980	-0.0688994	0.924747	-0.291761	0.0103778	-0.227568	0.12151	set2
SAMD9L	SAMD9L	ENSG00000177409	-0.170304	0.513247	-0.241944	0.0339221	-0.0761084	0.753312	set2
SDHAF3	SDHAF3	ENSG00000196636	-0.204212	0.780117	-0.438506	0.0305789	-0.238774	0.502418	set2
LMTK2	LMTK2	ENSG00000164715	-0.206764	0.571286	-0.256599	0.0320263	-0.0553993	0.895885	set2
MIR3609	MIR3609	ENSG00000266019	-0.915129	0.256833	-1.02271	0.0182877	-0.112259	0.940327	set2
SMURF1	SMURF1	ENSG00000198742	0.15326	0.513848	0.337429	0.000101354	0.179244	0.193686	set2
ZNF789	ZNF789	ENSG00000198556	0.114107	0.782574	0.275399	0.00428313	0.156557	0.364431	set2
FAM200A	FAM200A	ENSG00000221909	-0.335817	0.351303	-0.507272	0.00501841	-0.17625	0.650144	set2
ZKSCAN1	ZKSCAN1	ENSG00000106261	-0.222044	0.0678322	-0.333654	9.86468e-06	-0.116327	0.381137	set2
PILRB	PILRB	ENSG00000121716	0.0904875	0.910994	0.366119	0.0216024	0.270783	0.195903	set2
SERPINE1	SERPINE1	ENSG00000106366	1.05388	0.00265929	4.3241	1.03832e-24	3.2646	5.07926e-12	set1
NAPEPLD	NAPEPLD	ENSG00000161048	-0.0390938	0.970695	-0.448	0.000135722	-0.413481	0.00110591	set1
DNAJC2	DNAJC2	ENSG00000105821	0.0587143	0.907587	0.315227	7.3235e-05	0.251831	0.00530232	set1
RINT1	RINT1	ENSG00000135249	0.128767	0.702178	0.234729	0.0198169	0.101639	0.665747	set2
NAMPT	NAMPT	ENSG00000105835	0.157244	0.614247	0.687218	3.42073e-16	0.525642	1.63794e-07	set1
PIK3CG	PIK3CG	ENSG00000105851	-0.0903538	0.741248	-0.260877	5.79389e-05	-0.175201	0.0126957	set1
HBP1	HBP1	ENSG00000105856	0.260758	0.257485	0.488817	3.44925e-05	0.223609	0.144346	set2
IFRD1	IFRD1	ENSG00000006652	0.109971	0.756941	0.235743	0.011611	0.121482	0.445274	set2
GPR85	GPR85	ENSG00000164604	-0.0735281	0.920945	-0.285132	0.0176187	-0.215926	0.141775	set2
ZNF800	ZNF800	ENSG00000048405	0.0475211	0.941834	0.172854	0.0416425	0.120944	0.393657	set2
CCDC136	CCDC136	ENSG00000128596	-0.100249	0.920922	-0.414391	0.0115501	-0.318844	0.0895416	set2
CEP41	CEP41	ENSG00000106477	-0.185611	0.585485	-0.294795	0.0226088	-0.113689	0.614329	set2
LINC-PINT	LINC-PINT	ENSG00000231721	0.331554	0.100891	0.703749	8.29497e-08	0.367586	0.0599815	set2
WDR91	WDR91	ENSG00000105875	0.11715	0.820839	0.263432	0.047714	0.141639	0.60338	set2
STMP1	STMP1	ENSG00000243317	-0.147392	0.462864	-0.228917	0.0071004	-0.0860958	0.637943	set2
TRIM24	TRIM24	ENSG00000122779	-0.218572	0.103251	-0.299374	6.26533e-05	-0.0856122	0.567013	set2
ZC3HAV1	ZC3HAV1	ENSG00000105939	0.0523024	0.920945	0.205225	0.00738376	0.14823	0.100171	set2
TAS2R4	TAS2R4	ENSG00000127364	-0.181226	0.928768	-0.920007	0.00150459	-0.743371	0.0318869	set1
ZNF398	ZNF398	ENSG00000197024	0.233978	0.244991	0.308894	0.00635187	0.0701838	0.837089	set2
SSPO	SSPO	ENSG00000197558	-0.337956	0.652201	-0.518682	0.0432465	-0.184978	0.774866	set2
ZNF862	ZNF862	ENSG00000106479	-0.11772	0.895031	-0.465759	0.00343412	-0.352889	0.0610663	set2
REPIN1	REPIN1	ENSG00000214022	-0.0231538	0.984555	0.304476	0.00681752	0.3225	0.00209643	set1
LINC00996	LINC00996	ENSG00000242258	-0.537306	0.141985	-0.793403	0.000155817	-0.260406	0.554435	set2
GIMAP8	GIMAP8	ENSG00000171115	-0.380986	0.815449	-0.840557	0.0451034	-0.464624	0.552959	set2
GIMAP6	GIMAP6	ENSG00000133561	-0.236173	0.396786	-0.501276	1.85999e-06	-0.27041	0.0971764	set2
GIMAP2	GIMAP2	ENSG00000106560	-0.242385	0.439142	-0.412461	0.00185746	-0.174683	0.518605	set2
AOC1	AOC1	ENSG00000002726	-0.249211	0.585792	-0.392276	0.0190569	-0.148958	0.68078	set2
ABCB8	ABCB8	ENSG00000197150	-0.119267	0.820785	-0.248656	0.0456791	-0.134518	0.586556	set2
AGAP3	AGAP3	ENSG00000133612	0.393153	0.0383264	0.190371	0.242094	-0.20789	0.297473	set3
RHEB	RHEB	ENSG00000106615	0.0750812	0.868319	0.216012	0.00910068	0.136226	0.335197	set2
	AC011899.2	ENSG00000233038	-0.250304	0.240544	-0.417615	1.75637e-06	-0.172239	0.260438	set2
	AC078942.1	ENSG00000225365	-0.159568	0.795906	-0.497617	0.00057659	-0.342829	0.0730015	set2
ESYT2	ESYT2	ENSG00000117868	0.164772	0.273712	0.220652	0.00332143	0.0512951	0.770749	set2
CLN8	CLN8	ENSG00000182372	0.205849	0.399272	0.406272	0.000313248	0.195788	0.350917	set2
DEFA1	DEFA1	ENSG00000206047	-0.0494958	0.952934	-0.264419	0.008432	-0.219739	0.53316	set2
PPP1R3B	PPP1R3B	ENSG00000173281	-0.0322428	0.967884	-0.419594	2.22028e-05	-0.391967	0.000136176	set1
	AC034111.1	ENSG00000260093	-0.529235	0.589825	-1.11664	0.00355314	-0.591512	0.301339	set2
	AC104964.2	ENSG00000261451	0.464894	0.0205536	0.163412	0.430575	-0.306114	0.212549	set3
	AC069185.1	ENSG00000255046	-1.02977	0.128459	-1.21995	0.00759052	-0.195265	0.865688	set2
LONRF1	LONRF1	ENSG00000154359	0.531327	0.00154491	0.812468	1.87922e-10	0.276697	0.237644	set3
VPS37A	VPS37A	ENSG00000155975	0.0906866	0.840605	0.367133	1.63481e-06	0.272037	0.0112367	set1
PCM1	PCM1	ENSG00000078674	0.139632	0.450105	0.214933	0.00423944	0.0707632	0.589922	set2
CSGALNACT1	CSGALNACT1	ENSG00000147408	-0.291863	0.103251	-0.273796	0.013675	0.0134836	0.973461	set2
SLC18A1	SLC18A1	ENSG00000036565	-0.319736	0.782356	-0.65134	0.0427444	-0.336515	0.581307	set2
ATP6V1B2	ATP6V1B2	ENSG00000147416	-0.271435	0.013343	-0.35898	9.16622e-07	-0.0921281	0.504448	set3
DOK2	DOK2	ENSG00000147443	0.0986623	0.73667	0.196852	0.0161753	0.0935707	0.536816	set2
NUDT18	NUDT18	ENSG00000275074	-0.348848	0.239331	-0.487925	0.0061076	-0.143748	0.732794	set2
PPP3CC	PPP3CC	ENSG00000120910	0.131374	0.854019	0.486494	0.00229132	0.350502	0.111375	set2
	AC037459.3	ENSG00000253200	0.0381751	0.973054	0.361682	0.0174519	0.318863	0.0814482	set2
BIN3	BIN3	ENSG00000147439	0.0491805	0.933683	0.377301	2.17468e-06	0.323503	5.39815e-05	set1
EGR3	EGR3	ENSG00000179388	1.14981	0.0210556	5.75614	1.94619e-47	4.60202	5.39589e-22	set1
TNFRSF10B	TNFRSF10B	ENSG00000120889	0.278656	0.633063	0.518632	0.0225572	0.236256	0.445116	set2
TNFRSF10C	TNFRSF10C	ENSG00000173535	-0.474243	0.404019	-0.8202	0.00229132	-0.350815	0.486864	set2
TNFRSF10D	TNFRSF10D	ENSG00000173530	0.213418	0.469374	0.422044	0.00421901	0.203931	0.487658	set2
TNFRSF10A	TNFRSF10A	ENSG00000104689	0.150144	0.77464	0.327634	0.00668707	0.172738	0.572533	set2
GNRH1	GNRH1	ENSG00000147437	0.372193	0.478289	0.560678	0.0453153	0.183774	0.80912	set2
KCTD9	KCTD9	ENSG00000104756	0.172805	0.331964	0.276078	0.00141441	0.0987473	0.570593	set2
PPP2R2A	PPP2R2A	ENSG00000221914	0.101266	0.781571	0.19643	0.0381945	0.0907071	0.653927	set2
PTK2B	PTK2B	ENSG00000120899	0.179757	0.227342	0.277831	6.16063e-05	0.0932836	0.465221	set2
WRN	WRN	ENSG00000165392	0.0744969	0.887858	0.221309	0.0322291	0.142158	0.339096	set2
RNF122	RNF122	ENSG00000133874	-0.139457	0.821218	-0.321906	0.00722531	-0.188024	0.469932	set2
ERLIN2	ERLIN2	ENSG00000147475	-0.108004	0.728657	-0.212045	0.0280896	-0.108745	0.559618	set2
RAB11FIP1	RAB11FIP1	ENSG00000156675	-0.0229251	0.972446	0.293126	8.62856e-06	0.311412	4.026e-07	set1
DDHD2	DDHD2	ENSG00000085788	0.167766	0.535166	0.237142	0.0424886	0.0647711	0.837359	set2
	AC067817.1	ENSG00000253586	0.436158	0.536359	0.763321	0.0285699	0.322804	0.718103	set2
	AC090739.1	ENSG00000254165	0.114469	0.934238	0.489353	0.0476066	0.370095	0.348474	set2
RNF170	RNF170	ENSG00000120925	-0.186578	0.759838	-0.39831	0.0277955	-0.216183	0.502826	set2
RB1CC1	RB1CC1	ENSG00000023287	0.134448	0.685705	0.259004	0.00837513	0.120253	0.529188	set2
LYN	LYN	ENSG00000254087	0.158896	0.451998	0.41705	3.16607e-07	0.25345	0.000663046	set1
	AC018607.1	ENSG00000254325	-0.0209732	0.985662	0.878686	2.06742e-07	0.894947	5.66102e-07	set1
FAM110B	FAM110B	ENSG00000169122	-0.581642	0.194672	-0.634488	0.0294228	-0.0582144	0.947056	set2
SDCBP	SDCBP	ENSG00000137575	0.0376983	0.953698	0.223229	0.0113736	0.181088	0.0379663	set1
RAB2A	RAB2A	ENSG00000104388	0.089179	0.79081	0.179507	0.04355	0.0856089	0.643913	set2
ASPH	ASPH	ENSG00000198363	0.127155	0.761627	0.207453	0.0352475	0.0759108	0.790765	set2
PDE7A	PDE7A	ENSG00000205268	-0.14196	0.524356	-0.21398	0.0186418	-0.0767646	0.646416	set2
CSPP1	CSPP1	ENSG00000104218	0.245615	0.365283	0.584729	2.78824e-11	0.334876	0.0294069	set1
	AC079089.1	ENSG00000246528	-0.179747	0.820785	-0.506342	0.00476777	-0.331888	0.209969	set2
ZBTB10	ZBTB10	ENSG00000205189	-0.230926	0.278826	-0.512985	6.96288e-08	-0.28703	0.000860229	set1
RPSAP47	RPSAP47	ENSG00000188856	-0.563351	0.00475645	-0.691926	5.90508e-06	-0.133258	0.741246	set3
RBM12B	RBM12B	ENSG00000183808	-0.140508	0.425358	-0.17882	0.0304088	-0.042893	0.83715	set2
TMEM67	TMEM67	ENSG00000164953	0.196996	0.805408	0.590668	0.00782758	0.389158	0.186697	set2
PDP1	PDP1	ENSG00000164951	0.26346	0.239331	0.432724	0.000151833	0.16504	0.504448	set2
CCNE2	CCNE2	ENSG00000175305	0.0828509	0.874883	0.233651	0.0334705	0.146152	0.423159	set2
OSR2	OSR2	ENSG00000164920	-0.55155	0.0421554	1.20288	2.28554e-07	1.75006	1.98022e-22	set1
RNF19A	RNF19A	ENSG00000034677	0.181528	0.381892	0.445011	1.26274e-07	0.259177	0.00575022	set1
RRM2B	RRM2B	ENSG00000048392	0.0668814	0.927009	0.335644	0.000718896	0.26448	0.0318619	set1
UBR5	UBR5	ENSG00000104517	0.113652	0.51693	0.169655	0.0118608	0.0513783	0.736071	set2
KLF10	KLF10	ENSG00000155090	0.937736	9.01241e-13	1.57498	1.72107e-60	0.63309	1.2157e-06	set1
SLC25A32	SLC25A32	ENSG00000164933	0.188858	0.202842	0.373653	8.47734e-06	0.180109	0.147917	set2
LRP12	LRP12	ENSG00000147650	0.567228	0.0334228	1.01761	2.0332e-07	0.445751	0.172177	set3
FAM91A1	FAM91A1	ENSG00000176853	0.00799475	0.988175	0.164836	0.0337154	0.152285	0.0968659	set2
SQLE	SQLE	ENSG00000104549	-0.247679	0.0960827	-0.289475	0.0114471	-0.0463334	0.88325	set2
TRIB1	TRIB1	ENSG00000173334	-0.00969408	0.985662	0.191427	0.0254453	0.196449	0.0371212	set1
TG	TG	ENSG00000042832	-0.293493	0.741769	-0.557324	0.0476491	-0.268165	0.634585	set2
SLA	SLA	ENSG00000155926	0.0654985	0.840029	-0.218812	0.000762891	-0.2889	7.18009e-07	set1
NDRG1	NDRG1	ENSG00000104419	-0.128005	0.736065	-0.251513	0.0299165	-0.128165	0.516316	set2
ST3GAL1	ST3GAL1	ENSG00000008513	0.0504829	0.924298	0.19713	0.0102194	0.141791	0.161747	set2
DENND3	DENND3	ENSG00000105339	-0.0825999	0.854844	-0.263981	0.00268638	-0.186211	0.00485592	set1
ZNF623	ZNF623	ENSG00000183309	-0.183513	0.443136	-0.330574	0.00323516	-0.151691	0.47376	set2
PARP10	PARP10	ENSG00000178685	-0.231711	0.377987	-0.291726	0.0335705	-0.0651246	0.811194	set2
ZNF252P	ZNF252P	ENSG00000196922	-0.224729	0.522668	-0.522023	7.31201e-06	-0.302447	0.0787233	set2
DOCK8	DOCK8	ENSG00000107099	-0.193946	0.0900891	-0.179911	0.00941412	0.00934119	0.965828	set2
KANK1	KANK1	ENSG00000107104	-0.148961	0.695	-0.328228	0.00141033	-0.18437	0.361168	set2
SMARCA2	SMARCA2	ENSG00000080503	0.112356	0.588731	0.355094	6.20059e-10	0.238049	0.00118623	set1
VLDLR	VLDLR	ENSG00000147852	-0.244012	0.296996	-0.263381	0.0472757	-0.024062	0.957155	set2
PUM3	PUM3	ENSG00000080608	0.140318	0.507815	0.248623	0.00412959	0.103587	0.515383	set2
RN7SL5P	RN7SL5P	ENSG00000265735	-0.780027	0.366689	-0.941144	2.84427e-05	-0.165771	0.91658	set2
HACD4	HACD4	ENSG00000188921	-0.0821975	0.874158	-0.220375	0.0377597	-0.142699	0.392928	set2
UBA52P6	UBA52P6	ENSG00000215221	0.301635	0.820785	0.775996	0.0484334	0.469654	0.550041	set2
TOPORS	TOPORS	ENSG00000197579	0.151192	0.541347	0.302943	0.0018034	0.147299	0.367373	set2
FAM214B	FAM214B	ENSG00000005238	0.10372	0.816665	0.241895	0.0220509	0.133321	0.487375	set2
TESK1	TESK1	ENSG00000107140	0.563137	0.052653	0.801588	4.86975e-05	0.233962	0.666715	set2
ARHGEF39	ARHGEF39	ENSG00000137135	-0.252579	0.265692	-0.330864	0.0122579	-0.0831405	0.809136	set2
GLIPR2	GLIPR2	ENSG00000122694	0.45192	0.519308	0.740537	0.00770506	0.284947	0.735925	set2
TOMM5	TOMM5	ENSG00000175768	0.116608	0.872095	0.59913	4.68134e-05	0.477889	0.00575022	set1
TRMT10B	TRMT10B	ENSG00000165275	-0.0944705	0.917627	-0.397573	0.00313942	-0.30755	0.0997828	set2
DCAF10	DCAF10	ENSG00000122741	-0.155011	0.47097	-0.193684	0.0385848	-0.0435045	0.868155	set2
LINC01410	LINC01410	ENSG00000238113	-0.0839848	0.894745	-0.286696	0.0262462	-0.20716	0.246845	set2
TJP2	TJP2	ENSG00000119139	-0.219395	0.248145	-0.220563	0.0272079	-0.00606086	0.99046	set2
KLF9	KLF9	ENSG00000119138	0.1321	0.922892	0.740183	0.00158987	0.603472	0.0464099	set1
LINC01504	LINC01504	ENSG00000225434	-0.246782	0.460921	-0.404645	0.00804726	-0.162728	0.588357	set2
ZFAND5	ZFAND5	ENSG00000107372	-0.034828	0.962573	0.186164	0.0478271	0.216299	0.0868619	set2
ANXA1	ANXA1	ENSG00000135046	0.233342	0.366448	0.654965	0.000613353	0.417234	5.26863e-06	set1
RMI1	RMI1	ENSG00000178966	-0.113547	0.740188	-0.33292	7.3386e-05	-0.223618	0.0288418	set1
CKS2	CKS2	ENSG00000123975	-0.185103	0.341388	-0.235593	0.0239403	-0.0550898	0.833395	set2
FGD3	FGD3	ENSG00000127084	-0.238839	0.290596	-0.390062	0.000161609	-0.156399	0.266996	set2
PTCH1	PTCH1	ENSG00000185920	0.255958	0.161229	0.37417	0.000192258	0.113217	0.641483	set2
AAED1	AAED1	ENSG00000158122	0.19964	0.691756	0.517451	0.00122329	0.313282	0.173887	set2
	AL590705.5	ENSG00000254876	-0.404004	0.471835	-0.646709	0.0220778	-0.247177	0.676045	set2
TRIM14	TRIM14	ENSG00000106785	-0.20689	0.361088	-0.241079	0.0187649	-0.0391456	0.898841	set2
RNF20	RNF20	ENSG00000155827	-0.143825	0.551218	-0.206225	0.0489371	-0.0668833	0.77732	set2
ABCA1	ABCA1	ENSG00000165029	-0.318773	0.110427	-0.379915	0.000373484	-0.06581	0.866744	set2
FKTN	FKTN	ENSG00000106692	-0.19853	0.332163	-0.235279	0.0351516	-0.0412077	0.901764	set2
KLF4	KLF4	ENSG00000136826	-0.183703	0.881124	1.99099	0.00234638	2.17152	0.00110829	set1
CTNNAL1	CTNNAL1	ENSG00000119326	0.141693	0.687403	0.273554	0.0191349	0.127211	0.565528	set2
SLC31A2	SLC31A2	ENSG00000136867	0.241615	0.451998	0.840843	5.73874e-11	0.59472	0.000186709	set1
SLC31A1	SLC31A1	ENSG00000136868	0.0804379	0.914114	0.247678	0.0290087	0.162928	0.460397	set2
MEGF9	MEGF9	ENSG00000106780	-0.386369	0.012927	-0.368913	0.00154645	0.0126664	0.976921	set3
CUTALP	CUTALP	ENSG00000226752	-0.193948	0.652201	-0.503793	0.000112562	-0.314729	0.087696	set2
C5	C5	ENSG00000106804	-0.29677	0.30125	-0.47437	0.000112661	-0.18194	0.54084	set2
NEK6	NEK6	ENSG00000119408	-0.0962026	0.834007	-0.203265	0.0171012	-0.112077	0.56856	set2
NR6A1	NR6A1	ENSG00000148200	0.201417	0.385279	0.267808	0.0191295	0.0617248	0.845612	set2
ARPC5L	ARPC5L	ENSG00000136950	0.0944926	0.823357	0.405369	6.53547e-05	0.306164	0.00965117	set1
ZBTB43	ZBTB43	ENSG00000169155	0.170939	0.384855	0.313234	0.000761296	0.137657	0.416787	set2
SH2D3C	SH2D3C	ENSG00000095370	-0.0674466	0.939601	-0.278607	0.0285699	-0.216257	0.176862	set2
CDK9	CDK9	ENSG00000136807	0.0740381	0.872869	0.32983	1.63284e-05	0.250945	0.00350423	set1
FPGS	FPGS	ENSG00000136877	0.0435219	0.952934	0.294316	0.00102794	0.245776	0.0247511	set1
NAIF1	NAIF1	ENSG00000171169	-0.454556	0.0471582	-0.416647	0.0133449	0.0329276	0.953003	set3
SLC25A25	SLC25A25	ENSG00000148339	0.373158	0.0897327	0.664389	6.1757e-06	0.286427	0.173714	set2
ASB6	ASB6	ENSG00000148331	0.123509	0.795906	0.297755	0.00625993	0.169407	0.444826	set2
TOR1B	TOR1B	ENSG00000136816	0.185515	0.457519	0.234507	0.0429784	0.0445629	0.888531	set2
EEF1A1P5	EEF1A1P5	ENSG00000196205	-0.13218	0.445239	-0.204294	0.00219438	-0.0767453	0.653017	set2
CEL	CEL	ENSG00000170835	-0.208734	0.868319	-0.597442	0.0488262	-0.39323	0.437505	set2
GBGT1	GBGT1	ENSG00000148288	-0.27079	0.180125	-0.426841	0.000339816	-0.16075	0.440961	set2
SNHG7	SNHG7	ENSG00000233016	0.000922204	0.999334	0.223013	0.0312555	0.217252	0.0904628	set2
TOR4A	TOR4A	ENSG00000198113	0.0221986	0.984555	0.364419	0.00504708	0.337078	0.00816503	set1
NSMF	NSMF	ENSG00000165802	0.358462	0.0434514	0.388255	0.00190857	0.0249316	0.953137	set3
	AL359878.1	ENSG00000205740	-0.328922	0.790591	-0.884977	0.00358383	-0.560748	0.191135	set2
GTPBP4	GTPBP4	ENSG00000107937	0.0117122	0.985597	0.180786	0.0282068	0.164505	0.0967041	set2
KLF6	KLF6	ENSG00000067082	-0.196641	0.312035	1.19264	4.53387e-55	1.38461	6.3927e-73	set1
ASB13	ASB13	ENSG00000196372	-0.0929661	0.909099	-0.322898	0.0320379	-0.234657	0.241725	set2
FAM208B	FAM208B	ENSG00000108021	0.0644077	0.88124	0.157998	0.0491306	0.0890289	0.520993	set2
RN7SKP78	RN7SKP78	ENSG00000201581	0.281399	0.84939	0.938438	0.0132569	0.652205	0.300688	set2
MIR3155A	MIR3155A	ENSG00000263628	0.0802932	0.981555	1.28947	0.0119356	1.20418	0.0599797	set2
PRKCQ-AS1	PRKCQ-AS1	ENSG00000237943	-0.343142	0.275093	-0.516352	0.00175626	-0.178351	0.613113	set2
DHTKD1	DHTKD1	ENSG00000181192	-0.050985	0.944066	-0.206323	0.0335406	-0.160353	0.241263	set2
FAM107B	FAM107B	ENSG00000065809	0.079535	0.826586	0.172547	0.0226992	0.0884967	0.565528	set2
	AC073367.1	ENSG00000225213	0.348494	0.748412	0.801244	0.0280775	0.447889	0.555313	set2
ARL5B	ARL5B	ENSG00000165997	0.209213	0.2737	0.474625	2.84529e-08	0.261015	0.0247511	set1
APBB1IP	APBB1IP	ENSG00000077420	-0.358139	0.00871652	-0.439364	7.61496e-07	-0.0861872	0.661834	set3
WAC	WAC	ENSG00000095787	0.133055	0.424673	0.23134	0.00104608	0.0937421	0.489773	set2
	AL353796.1	ENSG00000259994	-0.341062	0.75952	-0.938406	0.00172241	-0.601811	0.142807	set2
MAP3K8	MAP3K8	ENSG00000107968	0.0244533	0.976752	0.623488	1.47301e-11	0.594324	1.22645e-10	set1
ARHGAP12	ARHGAP12	ENSG00000165322	0.289713	0.0450678	0.345424	0.000122349	0.0513783	0.846287	set3
CCDC7	CCDC7	ENSG00000216937	-0.12608	0.856567	-0.490313	0.000434762	-0.368896	0.014996	set1
ZNF248	ZNF248	ENSG00000198105	-0.0621065	0.944508	-0.318107	0.0147307	-0.260928	0.0706027	set2
ZNF33A	ZNF33A	ENSG00000189180	0.149418	0.386732	0.239324	0.00105027	0.0853641	0.586153	set2
ZNF487	ZNF487	ENSG00000243660	0.0311841	0.989486	1.32626	0.00227947	1.28834	0.01805	set1
MARCH8	MARCH8	ENSG00000165406	0.173332	0.54657	0.334378	0.00416801	0.156257	0.441024	set2
WASHC2C	WASHC2C	ENSG00000172661	0.0408942	0.944769	0.186391	0.0189316	0.140895	0.181325	set2
MAPK8	MAPK8	ENSG00000107643	0.227896	0.180125	0.236835	0.0179662	0.00452387	0.992345	set2
WDFY4	WDFY4	ENSG00000128815	-0.11479	0.722974	-0.162034	0.0484779	-0.0521499	0.823848	set2
C10orf128	C10orf128	ENSG00000204161	-0.290228	0.312035	-0.375135	0.0123155	-0.0894017	0.83735	set2
IPMK	IPMK	ENSG00000151151	0.167572	0.528329	0.723498	2.01638e-13	0.551453	9.94169e-08	set1
TPT1P10	TPT1P10	ENSG00000180221	0.112593	0.969464	1.2208	0.0109859	1.1029	0.0774283	set2
CDK1	CDK1	ENSG00000170312	-0.181154	0.313496	-0.21724	0.0194159	-0.0404581	0.842314	set2
ADO	ADO	ENSG00000181915	0.111104	0.657821	0.477124	5.72465e-11	0.361377	1.90725e-06	set1
EGR2	EGR2	ENSG00000122877	0.363557	0.58438	3.97327	4.92329e-53	3.60497	5.29791e-137	set1
JMJD1C	JMJD1C	ENSG00000171988	0.103933	0.758582	0.396366	4.35649e-09	0.287936	0.000355418	set1
SIRT1	SIRT1	ENSG00000096717	0.109002	0.772645	0.395209	2.10027e-05	0.281755	0.011443	set1
DDX21	DDX21	ENSG00000165732	0.153572	0.513104	0.386225	3.32046e-06	0.228246	0.00162413	set1
TYSND1	TYSND1	ENSG00000156521	-0.25788	0.623544	-0.560608	0.00172241	-0.307957	0.246099	set2
ADAMTS14	ADAMTS14	ENSG00000138316	-0.197921	0.554531	-0.363339	0.00879789	-0.170219	0.458286	set2
SLC29A3	SLC29A3	ENSG00000198246	-0.443034	0.0149968	-0.678659	7.28519e-10	-0.240921	0.208485	set3
CDH23	CDH23	ENSG00000107736	-0.145716	0.651771	-0.848806	2.90049e-23	-0.707819	5.27062e-28	set1
C10orf105	C10orf105	ENSG00000214688	-0.631266	0.00281461	-0.941455	5.15845e-10	-0.315532	0.113046	set3
VSIR	VSIR	ENSG00000107738	-0.0827932	0.887116	-0.268305	0.00110252	-0.190338	0.141227	set2
PSAP	PSAP	ENSG00000197746	-0.137374	0.599573	-0.181611	0.0278833	-0.0490391	0.848481	set2
DDIT4	DDIT4	ENSG00000168209	0.514991	0.000254285	-0.32038	0.00502289	-0.839429	1.0567e-21	set1
VCL	VCL	ENSG00000035403	-0.226448	0.0641787	-0.189093	0.0121053	0.0325875	0.89662	set2
SAMD8	SAMD8	ENSG00000156671	0.121597	0.846304	0.312645	0.031386	0.186749	0.430558	set2
ZNF503	ZNF503	ENSG00000165655	-0.0726781	0.944508	-0.341372	0.0119356	-0.273876	0.208669	set2
LRMDA	LRMDA	ENSG00000148655	0.251167	0.218909	0.277604	0.0107189	0.0218897	0.960962	set2
MIR606	MIR606	ENSG00000207583	0.715032	0.18428	0.804549	0.0272336	0.0842225	0.951808	set2
TSPAN14	TSPAN14	ENSG00000108219	-0.117548	0.75347	-0.256925	0.00461552	-0.144255	0.350324	set2
MINPP1	MINPP1	ENSG00000107789	-0.222838	0.577468	-0.449122	0.00328854	-0.230801	0.35572	set2
KLLN	KLLN	ENSG00000227268	-0.76529	0.081532	-0.941241	0.000693219	-0.181015	0.819014	set2
PTEN	PTEN	ENSG00000171862	-0.116319	0.541347	-0.170914	0.0315443	-0.0591782	0.70294	set2
ANKRD22	ANKRD22	ENSG00000152766	-0.751289	3.48647e-07	-1.02588	2.14653e-11	-0.278762	0.251225	set3
IFIT2	IFIT2	ENSG00000119922	-0.603377	0.0302674	-0.771933	2.64324e-05	-0.172208	0.643179	set3
IFIT3	IFIT3	ENSG00000119917	-0.414463	0.672431	-0.462053	0.0145709	-0.0501213	0.928429	set2
PANK1	PANK1	ENSG00000152782	-0.298571	0.271473	-0.460999	0.00312968	-0.166947	0.60818	set2
HHEX	HHEX	ENSG00000152804	0.0632081	0.940107	0.549974	4.69969e-07	0.482517	3.54564e-06	set1
FRA10AC1	FRA10AC1	ENSG00000148690	-0.107051	0.795906	-0.399914	2.69237e-05	-0.297623	0.00641444	set1
CCNJ	CCNJ	ENSG00000107443	0.0262382	0.981555	0.377762	0.00152359	0.347114	0.0294005	set1
FRAT2	FRAT2	ENSG00000181274	-0.0834165	0.882876	-0.228526	0.0257288	-0.150017	0.424649	set2
	AL391684.1	ENSG00000224934	-0.174826	0.895851	-0.651611	0.00706004	-0.480598	0.0966553	set2
SLC25A28	SLC25A28	ENSG00000155287	0.072272	0.927009	0.291913	0.0152175	0.214758	0.257053	set2
COX15	COX15	ENSG00000014919	-0.213765	0.149599	-0.347679	1.47419e-05	-0.138654	0.301292	set2
ERLIN1	ERLIN1	ENSG00000107566	0.041742	0.948208	0.199392	0.0239124	0.153179	0.186972	set2
CHUK	CHUK	ENSG00000213341	0.0565198	0.931676	0.209128	0.0377178	0.148294	0.220906	set2
SNORA12	SNORA12	ENSG00000212464	-0.827508	0.313477	-0.824046	0.0488262	-0.00410764	0.999038	set2
SCD	SCD	ENSG00000099194	-0.220931	0.202206	-0.221843	0.0270313	-0.00551069	0.987579	set2
OLMALINC	OLMALINC	ENSG00000235823	-0.272224	0.889958	-0.695629	0.0469662	-0.427484	0.539642	set2
SFXN3	SFXN3	ENSG00000107819	0.668552	4.05078e-08	0.72971	1.8353e-12	0.0566659	0.88325	set3
PPRC1	PPRC1	ENSG00000148840	0.116733	0.782356	0.338268	0.00237402	0.216756	0.069932	set2
NFKB2	NFKB2	ENSG00000077150	0.65026	0.000372691	1.06238	7.67565e-13	0.407481	0.122418	set3
RPARP-AS1	RPARP-AS1	ENSG00000269609	0.0108526	0.993007	-0.370814	0.0345047	-0.385818	0.0477207	set1
TRIM8	TRIM8	ENSG00000171206	0.20866	0.300874	0.329627	0.00034813	0.116066	0.615609	set2
CFAP58	CFAP58	ENSG00000120051	-0.255611	0.805893	-0.537071	0.0493854	-0.285215	0.596514	set2
DUSP5	DUSP5	ENSG00000138166	0.476779	0.00846564	0.857575	3.76918e-11	0.375873	0.0856933	set3
SHOC2	SHOC2	ENSG00000108061	0.0650317	0.90342	0.198496	0.0329856	0.12905	0.258191	set2
ADRB1	ADRB1	ENSG00000043591	-0.409658	0.506216	-0.941483	1.7032e-05	-0.53823	0.0715243	set2
ABLIM1	ABLIM1	ENSG00000099204	-0.193944	0.158032	-0.198088	0.0110975	-0.00875615	0.976388	set2
PDZD8	PDZD8	ENSG00000165650	0.0883182	0.811589	0.22965	0.0020911	0.136514	0.268669	set2
EIF3A	EIF3A	ENSG00000107581	0.0266953	0.962933	0.163189	0.0131902	0.131861	0.0919258	set2
INPP5F	INPP5F	ENSG00000198825	0.209256	0.232417	0.30175	0.0120337	0.087787	0.778065	set2
BUB3	BUB3	ENSG00000154473	-0.0994616	0.714857	-0.155569	0.0429312	-0.0606145	0.713107	set2
CHST15	CHST15	ENSG00000182022	-0.545905	0.130449	-0.837648	6.83364e-05	-0.29553	0.428785	set2
ZRANB1	ZRANB1	ENSG00000019995	0.17807	0.40144	0.35445	8.20272e-05	0.171817	0.220282	set2
PTPRE	PTPRE	ENSG00000132334	0.434184	3.25421e-06	0.680851	1.15696e-22	0.242243	0.00700268	set1
MKI67	MKI67	ENSG00000148773	-0.216989	0.239331	-0.202789	0.00154645	0.00949803	0.981833	set2
EBF3	EBF3	ENSG00000108001	0.183047	0.709685	0.370386	0.0274322	0.182734	0.629564	set2
FUOM	FUOM	ENSG00000148803	0.29128	0.181813	0.423439	0.00158435	0.127497	0.693982	set2
MRPL23	MRPL23	ENSG00000214026	0.0177633	0.985662	0.352273	0.0104161	0.329566	0.0399997	set1
CARS	CARS	ENSG00000110619	0.197593	0.324944	0.40669	3.53041e-05	0.204443	0.180629	set2
PGAP2	PGAP2	ENSG00000148985	-0.515164	0.289409	-0.644694	0.0242882	-0.135557	0.827903	set2
OR52K3P	OR52K3P	ENSG00000225101	-0.159895	0.867556	-0.460945	0.019034	-0.306003	0.313633	set2
OR52K1	OR52K1	ENSG00000196778	-0.149594	0.940548	-0.792851	5.7401e-05	-0.648191	0.0399997	set1
TPP1	TPP1	ENSG00000166340	-0.23059	0.28824	-0.3283	0.00049842	-0.102649	0.678605	set2
	AC107884.1	ENSG00000251364	-0.468485	0.528329	-0.863835	0.00380927	-0.400347	0.430558	set2
TRIM66	TRIM66	ENSG00000166436	-0.146231	0.687564	-0.274072	0.0142033	-0.132609	0.493534	set2
DENND5A	DENND5A	ENSG00000184014	0.319925	0.0874014	0.414003	0.000471494	0.0895072	0.795843	set2
ZNF143	ZNF143	ENSG00000166478	0.193747	0.52	0.350074	0.00763193	0.151578	0.524341	set2
ADM	ADM	ENSG00000148926	0.610852	0.262351	0.886353	0.0101239	0.270446	0.790765	set2
AMPD3	AMPD3	ENSG00000133805	-0.158828	0.512582	-0.415557	8.03036e-06	-0.261447	0.0184888	set1
MICAL2	MICAL2	ENSG00000133816	0.603131	1.86366e-07	0.976338	2.80581e-22	0.36875	0.00338611	set1
PLEKHA7	PLEKHA7	ENSG00000166689	-0.365015	0.658771	-0.655139	0.0204122	-0.296366	0.585175	set2
RN7SKP90	RN7SKP90	ENSG00000199883	-0.518437	0.231134	-0.724213	0.00254193	-0.21044	0.709449	set2
NCR3LG1	NCR3LG1	ENSG00000188211	0.222542	0.40876	0.417499	0.00118712	0.190493	0.309895	set2
	AC124798.1	ENSG00000260196	0.368695	0.571286	0.735072	0.0106265	0.361812	0.565528	set2
HIPK3	HIPK3	ENSG00000110422	0.2333	0.130449	0.422542	4.51504e-08	0.184807	0.0464099	set1
NAT10	NAT10	ENSG00000135372	-0.169695	0.366755	-0.167586	0.044124	-0.0027711	0.99462	set2
CD44	CD44	ENSG00000026508	0.52528	0.323476	0.940085	4.15767e-05	0.410451	0.425576	set2
PRR5L	PRR5L	ENSG00000135362	-0.600878	0.577786	-1.05217	0.0155833	-0.456409	0.465093	set2
MADD	MADD	ENSG00000110514	0.123143	0.564378	0.169473	0.0321899	0.0415247	0.845612	set2
CELF1	CELF1	ENSG00000149187	0.112135	0.546824	0.18963	0.00708483	0.0728587	0.623343	set2
FNBP4	FNBP4	ENSG00000109920	0.110322	0.646073	0.174859	0.0249575	0.0600479	0.735198	set2
PTPRJ	PTPRJ	ENSG00000149177	-0.329878	0.0751864	-0.347702	0.00263709	-0.0227499	0.95088	set2
TNKS1BP1	TNKS1BP1	ENSG00000149115	0.181296	0.820785	0.521103	0.00941412	0.33478	0.296247	set2
CTNND1	CTNND1	ENSG00000198561	0.245029	0.149523	0.368095	8.36635e-05	0.118285	0.594117	set2
FAM111A	FAM111A	ENSG00000166801	-0.126887	0.492737	-0.223655	0.00149785	-0.101441	0.393871	set2
PATL1	PATL1	ENSG00000166889	0.119235	0.57857	0.180421	0.0274212	0.0564866	0.782548	set2
FADS2	FADS2	ENSG00000134824	-0.14129	0.690675	-0.273884	0.00727586	-0.137327	0.466479	set2
FTH1	FTH1	ENSG00000167996	0.0252061	0.968714	0.213861	0.0043762	0.183915	0.0452894	set1
INCENP	INCENP	ENSG00000149503	-0.242728	0.234385	-0.247438	0.00450643	-0.00981585	0.983664	set2
ASRGL1	ASRGL1	ENSG00000162174	-0.0986071	0.773403	-0.203502	0.00812305	-0.10968	0.481075	set2
AHNAK	AHNAK	ENSG00000124942	1.24058	0.256569	1.80039	0.00162942	0.555774	0.277386	set2
TUT1	TUT1	ENSG00000149016	-0.284423	0.6393	-0.586554	0.00692786	-0.307037	0.368036	set2
STX5	STX5	ENSG00000162236	0.172449	0.440937	0.285857	0.00525986	0.108864	0.621308	set2
SLC3A2	SLC3A2	ENSG00000168003	0.0445239	0.945829	0.19753	0.0378581	0.148171	0.281703	set2
LGALS12	LGALS12	ENSG00000133317	-0.177189	0.299776	-0.272025	0.00109041	-0.0995584	0.363023	set2
ATL3	ATL3	ENSG00000184743	-0.14151	0.429188	-0.195867	0.0114449	-0.0590055	0.737105	set2
NRXN2	NRXN2	ENSG00000110076	-0.560556	0.00498019	-0.778159	9.706e-11	-0.222932	0.328956	set3
SF1	SF1	ENSG00000168066	0.0625482	0.90822	0.206671	0.00641983	0.139274	0.252251	set2
BATF2	BATF2	ENSG00000168062	-0.277292	0.25436	-0.848209	9.17244e-15	-0.576016	9.09619e-10	set1
SLC25A45	SLC25A45	ENSG00000162241	-0.257905	0.591342	-0.415685	0.0378002	-0.162957	0.699172	set2
NEAT1	NEAT1	ENSG00000245532	0.332919	0.0227302	0.29987	0.000680636	-0.0377266	0.915701	set3
LTBP3	LTBP3	ENSG00000168056	0.481141	0.352075	0.788496	0.0110311	0.30301	0.708241	set2
FAM89B	FAM89B	ENSG00000176973	0.115031	0.887278	0.334394	0.0398823	0.214708	0.504008	set2
EHBP1L1	EHBP1L1	ENSG00000173442	0.217172	0.0746861	0.317407	2.64183e-05	0.0954188	0.51564	set2
MAP3K11	MAP3K11	ENSG00000173327	0.0784468	0.887278	0.253972	0.00888851	0.17063	0.0854449	set2
AP5B1	AP5B1	ENSG00000254470	0.0755268	0.922892	0.381789	0.000852247	0.301058	0.00333086	set1
MUS81	MUS81	ENSG00000172732	0.0505925	0.944508	0.242291	0.0179218	0.186801	0.0990607	set2
FOSL1	FOSL1	ENSG00000175592	0.611783	0.0737184	1.62558	1.95927e-10	1.00911	0.00229073	set1
PELI3	PELI3	ENSG00000174516	0.278521	0.706077	0.917399	0.00135576	0.634908	0.137954	set2
RBM4	RBM4	ENSG00000173933	0.0161735	0.984555	0.236029	0.045043	0.215174	0.162731	set2
	AP001157.1	ENSG00000258297	0.197581	0.577786	0.328349	0.0244946	0.126105	0.709449	set2
KDM2A	KDM2A	ENSG00000173120	0.0738909	0.858821	0.190524	0.0149267	0.111788	0.41356	set2
PPP6R3	PPP6R3	ENSG00000110075	0.155243	0.313477	0.192607	0.0128236	0.0327781	0.871245	set2
IGHMBP2	IGHMBP2	ENSG00000132740	0.0819251	0.890125	0.272787	0.0216024	0.186167	0.255688	set2
TPCN2	TPCN2	ENSG00000162341	0.397648	0.00629202	0.426109	9.14783e-05	0.023848	0.947056	set3
	AP003071.1	ENSG00000260895	1.11003	0.0450678	0.626945	0.165224	-0.487471	0.653499	set3
MYEOV	MYEOV	ENSG00000172927	0.00709039	0.99666	-0.634952	0.00596806	-0.646561	0.0121867	set1
	AP002495.1	ENSG00000254469	-0.0449143	0.965986	-0.390866	0.00418224	-0.350641	0.0207616	set1
RNF121	RNF121	ENSG00000137522	0.228893	0.243273	0.224593	0.0498206	-0.0086909	0.985948	set2
P2RY2	P2RY2	ENSG00000175591	-0.0935753	0.881124	-0.268025	0.0140335	-0.179274	0.361272	set2
	AP002761.4	ENSG00000260401	-0.10544	0.890125	-0.386538	0.00109281	-0.286407	0.131575	set2
PAAF1	PAAF1	ENSG00000175575	-0.191976	0.414192	-0.310305	0.00415417	-0.123038	0.567566	set2
PGM2L1	PGM2L1	ENSG00000165434	0.388733	0.0467778	0.29772	0.0772385	-0.0955417	0.814736	set3
KCNE3	KCNE3	ENSG00000175538	-0.298581	0.075581	-0.465436	2.86979e-05	-0.171302	0.380181	set2
	AP001372.2	ENSG00000254837	-0.691499	0.324944	-0.920689	0.0172768	-0.233995	0.791543	set2
POLD3	POLD3	ENSG00000077514	0.087114	0.837597	0.223121	0.00818432	0.131333	0.428785	set2
PAK1	PAK1	ENSG00000149269	-0.212931	0.123728	-0.303308	6.70192e-05	-0.094944	0.583982	set2
SLC36A4	SLC36A4	ENSG00000180773	0.329508	0.0378882	0.272025	0.0171751	-0.0619505	0.825655	set3
FUT4	FUT4	ENSG00000196371	0.02734	0.972446	0.231487	0.00421901	0.19941	0.0894255	set2
CCDC82	CCDC82	ENSG00000149231	0.18547	0.328178	0.251519	0.00824464	0.061627	0.782005	set2
TMEM123	TMEM123	ENSG00000152558	0.177452	0.354343	0.330485	6.49296e-05	0.148561	0.142348	set2
MSANTD4	MSANTD4	ENSG00000170903	-0.090271	0.854802	-0.241228	0.0222543	-0.155731	0.202037	set2
KBTBD3	KBTBD3	ENSG00000182359	-0.111693	0.941392	-0.533641	0.0124674	-0.426287	0.132966	set2
AASDHPPT	AASDHPPT	ENSG00000149313	-0.117997	0.746176	-0.261416	0.0133682	-0.147766	0.341123	set2
ATM	ATM	ENSG00000149311	-0.0752906	0.832588	-0.219749	0.00291031	-0.148993	0.133126	set2
DIXDC1	DIXDC1	ENSG00000150764	0.794993	0.0175865	0.51219	0.0656367	-0.287636	0.610552	set3
BCO2	BCO2	ENSG00000197580	0.51418	0.0036542	0.844543	4.89847e-09	0.325641	0.206243	set3
KCTD9P4	KCTD9P4	ENSG00000214264	0.138199	0.952934	1.04498	0.0124674	0.902122	0.13124	set2
PTS	PTS	ENSG00000150787	0.158045	0.778562	0.404211	0.00879789	0.241812	0.353946	set2
	AP003174.1	ENSG00000255689	-0.320721	0.664961	-0.537203	0.0463227	-0.221097	0.674899	set2
	AP000997.2	ENSG00000260254	-0.304502	0.49265	-0.480686	0.0110427	-0.180431	0.562524	set2
ZPR1	ZPR1	ENSG00000109917	-0.0390407	0.952186	0.280617	0.000567761	0.314911	9.05596e-05	set1
SIK3	SIK3	ENSG00000160584	0.245994	0.0559783	0.309178	3.53041e-05	0.0585535	0.798405	set2
	AP000936.3	ENSG00000234268	0.460628	0.526271	0.802679	0.0186418	0.337325	0.686625	set2
PAFAH1B2	PAFAH1B2	ENSG00000168092	0.0681936	0.887858	0.231017	0.00692794	0.158338	0.119629	set2
CEP164	CEP164	ENSG00000110274	-0.0347808	0.963655	-0.247227	0.0147477	-0.217479	0.0635535	set2
SMIM35	SMIM35	ENSG00000255274	-0.565786	0.54657	-1.18509	0.000664919	-0.624107	0.198975	set2
TMPRSS4	TMPRSS4	ENSG00000137648	-0.257298	0.764167	-0.814488	0.000279709	-0.561935	0.0377281	set1
CXCR5	CXCR5	ENSG00000160683	0.388481	0.412306	0.564332	0.0124342	0.172083	0.816172	set2
	AP003392.4	ENSG00000255121	-0.0335883	0.985662	-0.633204	0.0305135	-0.604041	0.127341	set2
C2CD2L	C2CD2L	ENSG00000172375	0.226593	0.233775	0.431643	1.57935e-06	0.200012	0.165908	set2
NLRX1	NLRX1	ENSG00000160703	-0.161994	0.841421	-0.377519	0.0403221	-0.221108	0.499471	set2
RNF26	RNF26	ENSG00000173456	-0.288498	0.228737	-0.243663	0.0277178	0.0394503	0.928379	set2
GSEC	GSEC	ENSG00000280832	-0.442213	0.0788749	-0.806945	7.42491e-08	-0.369299	0.069235	set2
PRDM10	PRDM10	ENSG00000170325	0.238214	0.176372	0.319617	0.00251652	0.0768237	0.772587	set2
IQSEC3	IQSEC3	ENSG00000120645	-0.163596	0.77464	-0.398612	0.00149393	-0.240571	0.249015	set2
B4GALNT3	B4GALNT3	ENSG00000139044	-0.385316	0.370425	-0.815626	3.90349e-06	-0.436331	0.0807593	set2
	AC021054.1	ENSG00000177406	-0.40891	0.110427	-0.548696	0.00184282	-0.14437	0.740404	set2
RAD52	RAD52	ENSG00000002016	-0.302907	0.20717	-0.81047	3.15362e-14	-0.512247	2.6395e-05	set1
	AC005342.2	ENSG00000256706	-0.21174	0.907587	-0.727533	0.0249555	-0.520377	0.238302	set2
	AC006207.1	ENSG00000283138	-0.610306	0.443625	-1.35248	1.19709e-05	-0.748349	0.0465784	set1
LTBR	LTBR	ENSG00000111321	0.0346972	0.967374	0.21727	0.0315443	0.177511	0.248739	set2
CD27-AS1	CD27-AS1	ENSG00000215039	-0.416469	0.247269	-0.578068	0.0035968	-0.165846	0.734514	set2
TAPBPL	TAPBPL	ENSG00000139192	-0.0642296	0.920945	-0.246062	0.0187015	-0.186577	0.166806	set2
VAMP1	VAMP1	ENSG00000139190	0.256559	0.288939	0.391606	0.0011806	0.130699	0.637943	set2
NCAPD2	NCAPD2	ENSG00000010292	-0.302654	0.0679179	-0.335281	7.48219e-07	-0.0375246	0.915358	set2
NOP2	NOP2	ENSG00000111641	0.0923595	0.867556	0.221166	0.0463327	0.123844	0.536816	set2
LPAR5	LPAR5	ENSG00000184574	0.630509	0.244991	0.751547	0.0223958	0.117463	0.92698	set2
RPL13P5	RPL13P5	ENSG00000240370	0.393877	0.599573	0.598528	0.040834	0.200304	0.826328	set2
PTPN6	PTPN6	ENSG00000111679	0.10633	0.724287	0.239972	0.00416722	0.128829	0.185944	set2
NECAP1	NECAP1	ENSG00000089818	0.062208	0.923315	0.323788	0.00090029	0.257137	0.0279415	set1
	AC010186.3	ENSG00000257027	-0.0349405	0.975634	-0.320793	0.0145523	-0.290027	0.0659782	set2
CD69	CD69	ENSG00000110848	0.51189	0.00012813	2.07635	9.73896e-85	1.55973	1.16944e-38	set1
CLEC7A	CLEC7A	ENSG00000172243	0.338661	0.359108	1.26834	1.15815e-13	0.9253	1.90725e-06	set1
GABARAPL1	GABARAPL1	ENSG00000139112	0.121749	0.754383	0.341756	0.00154645	0.215489	0.17175	set2
YBX3	YBX3	ENSG00000060138	-0.0115618	0.985605	0.185318	0.0388135	0.19211	0.0783877	set2
	AC134349.1	ENSG00000256712	0.204816	0.752635	0.537762	0.0169686	0.328086	0.413371	set2
DUSP16	DUSP16	ENSG00000111266	0.156406	0.765631	0.322421	0.0412407	0.16142	0.644188	set2
APOLD1	APOLD1	ENSG00000178878	-0.175597	0.791792	-0.439479	0.0149634	-0.268671	0.382699	set2
ATF7IP	ATF7IP	ENSG00000171681	-0.245985	0.0276222	-0.230069	0.00394946	0.0113403	0.965828	set3
ERP27	ERP27	ENSG00000139055	0.290509	0.443625	0.434566	0.0178649	0.139721	0.746013	set2
ETNK1	ETNK1	ENSG00000139163	-0.112904	0.724642	-0.260835	0.000851053	-0.152388	0.240683	set2
KLHL42	KLHL42	ENSG00000087448	-0.122872	0.739932	-0.2418	0.0271191	-0.123709	0.502991	set2
CCDC91	CCDC91	ENSG00000123106	0.168222	0.388307	0.224981	0.014934	0.0522502	0.831457	set2
SINHCAF	SINHCAF	ENSG00000139146	0.152734	0.396786	0.30323	3.59797e-05	0.14605	0.126795	set2
ARID2	ARID2	ENSG00000189079	0.220569	0.0958027	0.258158	0.00169794	0.0330597	0.876553	set2
RN7SL246P	RN7SL246P	ENSG00000265093	0.889482	0.182409	1.04268	0.0147463	0.148533	0.93338	set2
SLC38A1	SLC38A1	ENSG00000111371	0.120188	0.573334	0.238363	0.00119063	0.113623	0.206212	set2
SLC38A2	SLC38A2	ENSG00000134294	0.359432	0.0168095	0.51905	1.5819e-07	0.155273	0.127085	set3
	AC025031.4	ENSG00000275481	-0.0578473	0.970104	-0.493105	0.00306502	-0.439023	0.069932	set2
	AC004241.1	ENSG00000257433	-0.583317	0.0497901	-0.872776	9.80148e-06	-0.293988	0.301162	set3
	AC024257.3	ENSG00000269514	-0.0258965	0.991661	-0.761827	0.0252351	-0.741656	0.0588505	set2
ZNF641	ZNF641	ENSG00000167528	0.17901	0.388307	0.219085	0.0238383	0.0356784	0.909015	set2
FKBP11	FKBP11	ENSG00000134285	0.410699	0.00395705	0.454781	3.54918e-07	0.039451	0.920878	set3
TUBA1C	TUBA1C	ENSG00000167553	-0.254657	0.0212504	-0.150221	0.0542354	0.0997533	0.479505	set3
FMNL3	FMNL3	ENSG00000161791	0.303347	0.00420553	0.273547	0.000665718	-0.0344931	0.900799	set3
NCKAP5L	NCKAP5L	ENSG00000167566	0.387102	0.0404303	0.536106	6.51496e-06	0.144006	0.643459	set3
BCDIN3D	BCDIN3D	ENSG00000186666	-0.22498	0.73079	-0.600292	0.000920175	-0.379649	0.139989	set2
SMARCD1	SMARCD1	ENSG00000066117	0.0386192	0.952934	0.208018	0.0196067	0.164625	0.194587	set2
CERS5	CERS5	ENSG00000139624	0.192872	0.207744	0.240863	0.00382265	0.0434497	0.864741	set2
LIMA1	LIMA1	ENSG00000050405	0.069939	0.923355	0.50711	6.85623e-07	0.432761	3.89439e-05	set1
	AC008147.2	ENSG00000257298	0.0364399	0.984555	1.44012	4.64519e-08	1.39907	3.49422e-08	set1
METTL7A	METTL7A	ENSG00000185432	-0.176943	0.366448	-0.255238	0.00425392	-0.0830924	0.701448	set2
CSRNP2	CSRNP2	ENSG00000110925	-0.228497	0.285675	-0.257641	0.0358693	-0.0336683	0.922321	set2
TFCP2	TFCP2	ENSG00000135457	-0.164246	0.40911	-0.224996	0.0184204	-0.0655561	0.776319	set2
RARG	RARG	ENSG00000172819	0.834628	0.0884953	1.04249	0.00287735	0.206749	0.8803	set2
C12orf10	C12orf10	ENSG00000139637	0.143765	0.702135	0.382063	0.00109281	0.233724	0.160226	set2
SMUG1	SMUG1	ENSG00000123415	-0.120566	0.727979	-0.304498	0.00204264	-0.188641	0.147917	set2
	AC023794.5	ENSG00000260470	-0.223363	0.887278	-0.670119	0.0305526	-0.451482	0.319815	set2
CBX5	CBX5	ENSG00000094916	-0.110195	0.571286	-0.187392	0.00299081	-0.0818903	0.524598	set2
NFE2	NFE2	ENSG00000123405	-0.261202	0.882876	-1.03321	0.000771824	-0.77723	0.0459026	set1
ITGA5	ITGA5	ENSG00000161638	0.262407	0.121449	0.487283	2.46037e-10	0.22	0.0447534	set1
TESPA1	TESPA1	ENSG00000135426	-0.317604	0.182409	-0.511886	9.4752e-05	-0.199186	0.380181	set2
SUOX	SUOX	ENSG00000139531	-0.191823	0.549901	-0.322349	0.0155747	-0.135418	0.560312	set2
ESYT1	ESYT1	ENSG00000139641	0.329666	0.0153291	0.498552	2.31764e-09	0.164054	0.331642	set3
PAN2	PAN2	ENSG00000135473	-0.236798	0.260468	-0.250155	0.0422476	-0.01784	0.959879	set2
STAT2	STAT2	ENSG00000170581	-0.113974	0.763215	-0.232086	0.0213394	-0.122652	0.340604	set2
ZBTB39	ZBTB39	ENSG00000166860	0.0490578	0.953802	0.255049	0.048512	0.201082	0.303829	set2
NAB2	NAB2	ENSG00000166886	1.40848	1.81226e-07	2.16263	4.25348e-24	0.750626	2.69958e-10	set1
STAC3	STAC3	ENSG00000185482	-0.218552	0.181813	-0.212186	0.0360203	0.00174767	0.99685	set2
R3HDM2	R3HDM2	ENSG00000179912	-0.187544	0.446442	-0.289687	0.0101239	-0.106976	0.573563	set2
DDIT3	DDIT3	ENSG00000175197	0.180207	0.633706	0.39836	0.00815241	0.213524	0.437505	set2
METTL1	METTL1	ENSG00000037897	0.278061	0.513988	0.410346	0.0349322	0.127966	0.778704	set2
SLC16A7	SLC16A7	ENSG00000118596	0.25918	0.0450678	0.178649	0.0563216	-0.085247	0.566349	set3
USP15	USP15	ENSG00000135655	0.165953	0.399528	0.229736	0.00629513	0.0593311	0.745162	set2
PPM1H	PPM1H	ENSG00000111110	-0.305578	0.0868648	-0.251195	0.044297	0.0492474	0.867827	set2
C12orf66	C12orf66	ENSG00000174206	-0.191273	0.73667	-0.455428	0.00354288	-0.268377	0.302291	set2
TBK1	TBK1	ENSG00000183735	0.0931808	0.816665	0.276422	0.00235632	0.178816	0.0805869	set2
GNS	GNS	ENSG00000135677	-0.142381	0.469374	-0.204089	0.0173008	-0.0664611	0.711086	set2
TBC1D30	TBC1D30	ENSG00000111490	-0.642174	0.324786	-0.786035	0.0371752	-0.148117	0.879651	set2
DYRK2	DYRK2	ENSG00000127334	0.128966	0.589473	0.293472	0.000391784	0.159764	0.171353	set2
RAP1B	RAP1B	ENSG00000127314	0.114692	0.658771	0.168727	0.0379645	0.0495763	0.800192	set2
THAP2	THAP2	ENSG00000173451	-0.557193	0.0796957	-0.803547	4.76331e-05	-0.250666	0.524341	set2
PHLDA1	PHLDA1	ENSG00000139289	0.416894	0.00250808	1.01774	2.92795e-29	0.596455	1.54196e-08	set1
BBS10	BBS10	ENSG00000179941	-0.381761	0.0635199	-0.517483	1.97668e-05	-0.139785	0.645077	set2
PPP1R12A-AS1	PPP1R12A-AS1	ENSG00000257557	-0.437588	0.528329	-0.764487	0.00759052	-0.331717	0.54298	set2
DUSP6	DUSP6	ENSG00000139318	-0.06565	0.881124	-0.316039	7.74878e-06	-0.255092	3.30373e-05	set1
ATP2B1	ATP2B1	ENSG00000070961	0.260072	0.179286	0.469414	4.96268e-07	0.205175	0.120085	set2
BTG1	BTG1	ENSG00000133639	-0.191216	0.155733	-0.440386	5.58041e-10	-0.253784	0.00175597	set1
	AC025164.2	ENSG00000245904	-0.0902063	0.972466	-0.76831	0.0220733	-0.682439	0.116078	set2
METAP2	METAP2	ENSG00000111142	0.0841847	0.856495	0.204826	0.0395625	0.116337	0.415313	set2
ELK3	ELK3	ENSG00000111145	-0.22665	0.185552	-0.23046	0.0141616	-0.00848748	0.985289	set2
TDG	TDG	ENSG00000139372	-0.0152322	0.984555	0.184984	0.0378554	0.195712	0.0255203	set1
TXNRD1	TXNRD1	ENSG00000198431	0.111102	0.683785	0.175359	0.0463082	0.059735	0.727699	set2
TCP11L2	TCP11L2	ENSG00000166046	0.362307	0.585485	0.643844	0.0322733	0.276789	0.678605	set2
POLR3B	POLR3B	ENSG00000013503	0.182513	0.578934	0.311712	0.0220733	0.124502	0.696704	set2
CRY1	CRY1	ENSG00000008405	0.362692	0.426073	0.563739	0.006955	0.196789	0.756599	set2
PWP1	PWP1	ENSG00000136045	0.149847	0.525949	0.237213	0.0152238	0.082925	0.708514	set2
CORO1C	CORO1C	ENSG00000110880	0.0659749	0.878269	0.235409	0.00172241	0.164877	0.0507737	set2
UBE3B	UBE3B	ENSG00000151148	-0.260733	0.085931	-0.316538	0.000379037	-0.0608128	0.804876	set2
MVK	MVK	ENSG00000110921	-0.240432	0.367663	-0.30863	0.0413093	-0.0728281	0.848458	set2
ANKRD13A	ANKRD13A	ENSG00000076513	0.101825	0.696121	0.214119	0.00557619	0.107777	0.362535	set2
PPTC7	PPTC7	ENSG00000196850	0.085977	0.840029	0.509803	2.09977e-10	0.419355	3.9535e-08	set1
FAM109A	FAM109A	ENSG00000198324	0.329431	0.584728	0.710207	0.00258477	0.376105	0.433309	set2
SH2B3	SH2B3	ENSG00000111252	0.299612	0.0157907	0.27278	4.46808e-05	-0.0316021	0.917024	set3
ACAD10	ACAD10	ENSG00000111271	-0.26704	0.136697	-0.443264	1.14764e-06	-0.181325	0.230063	set2
RN7SKP71	RN7SKP71	ENSG00000201428	-0.675543	0.493548	-0.776612	5.61908e-08	-0.10753	0.947056	set2
PTPN11	PTPN11	ENSG00000179295	0.150537	0.366755	0.247689	0.000944109	0.092603	0.421921	set2
OAS1	OAS1	ENSG00000089127	-0.384153	0.12541	-0.555635	0.000169574	-0.175707	0.534791	set2
OAS3	OAS3	ENSG00000111331	-0.222156	0.149908	-0.323846	0.000746215	-0.106372	0.50395	set2
RASAL1	RASAL1	ENSG00000111344	0.779056	0.000909593	1.29477	7.66604e-07	0.512569	0.355224	set3
TPCN1	TPCN1	ENSG00000186815	-0.319871	0.093034	-0.484506	4.38154e-06	-0.169884	0.185977	set2
SDSL	SDSL	ENSG00000139410	-0.275684	0.391931	-0.607167	8.03036e-06	-0.336152	0.0557278	set2
	AC127164.1	ENSG00000257279	0.339823	0.694936	0.642379	0.0379809	0.297882	0.692923	set2
PRKAB1	PRKAB1	ENSG00000111725	-0.142552	0.571124	-0.302274	0.00016461	-0.164728	0.189343	set2
CIT	CIT	ENSG00000122966	-0.200164	0.211278	-0.231539	0.00194259	-0.0362208	0.89415	set2
PXN	PXN	ENSG00000089159	-0.166735	0.652201	-0.263878	0.0156968	-0.102068	0.656095	set2
COQ5	COQ5	ENSG00000110871	-0.17806	0.631803	-0.317162	0.0106421	-0.143307	0.593634	set2
SETD1B	SETD1B	ENSG00000139718	0.162982	0.589825	0.217694	0.013675	0.0496825	0.87434	set2
RSRC2	RSRC2	ENSG00000111011	0.00989375	0.985759	0.216506	0.00463358	0.202111	0.0274938	set1
	AC027290.2	ENSG00000280138	0.15361	0.672431	0.526832	1.5819e-07	0.368715	0.00665891	set1
C12orf65	C12orf65	ENSG00000130921	-0.140662	0.79347	-0.315354	0.0424171	-0.179226	0.530342	set2
SBNO1	SBNO1	ENSG00000139697	0.0643498	0.872089	0.166599	0.0352109	0.0977341	0.481075	set2
RILPL2	RILPL2	ENSG00000150977	0.170179	0.233188	0.351007	1.20516e-07	0.176101	0.0568273	set2
	AC055713.1	ENSG00000247373	-0.118072	0.952934	-0.646679	0.0285689	-0.533038	0.105148	set2
	AC068790.3	ENSG00000269997	0.447563	0.449357	0.572556	0.0439763	0.120534	0.906898	set2
UBC	UBC	ENSG00000150991	-0.023162	0.970104	0.167618	0.0284985	0.186204	0.0277668	set1
BRI3BP	BRI3BP	ENSG00000184992	-0.191452	0.259177	-0.191155	0.0139491	-0.00457001	0.991075	set2
	AC131212.3	ENSG00000280287	0.57362	0.000127207	0.489068	0.000280095	-0.0892485	0.82247	set3
ANKLE2	ANKLE2	ENSG00000176915	0.289565	0.00225727	0.552814	2.16738e-21	0.258668	0.000466833	set1
ZNF605	ZNF605	ENSG00000196458	0.0181486	0.985662	-0.342678	0.0183396	-0.365584	0.0452894	set1
LATS2	LATS2	ENSG00000150457	0.128001	0.826707	0.358577	0.00778171	0.226004	0.387458	set2
LINC00539	LINC00539	ENSG00000224429	-0.154089	0.83611	-0.354515	0.0426755	-0.204577	0.512096	set2
NUP58	NUP58	ENSG00000139496	0.137872	0.528329	0.202018	0.0404023	0.059481	0.814228	set2
PAN3	PAN3	ENSG00000152520	0.207253	0.182361	0.296222	0.000521456	0.0844647	0.648755	set2
LINC00426	LINC00426	ENSG00000238121	-0.403033	0.439305	-0.971395	4.89204e-06	-0.572693	0.030513	set1
HSPH1	HSPH1	ENSG00000120694	-0.233506	0.0547044	-0.286641	0.000622894	-0.0577277	0.786625	set2
FRY	FRY	ENSG00000073910	0.146419	0.429188	0.202903	0.00686478	0.0516418	0.80638	set2
CCDC169	CCDC169	ENSG00000242715	-0.354331	0.744548	-0.857745	0.00692794	-0.508071	0.279693	set2
RFXAP	RFXAP	ENSG00000133111	-0.177367	0.709911	-0.311373	0.0422222	-0.138818	0.680916	set2
SUPT20H	SUPT20H	ENSG00000102710	-0.0772881	0.873235	-0.299409	0.000446668	-0.22642	0.00816247	set1
RGS17P1	RGS17P1	ENSG00000229473	0.00290261	0.998869	0.756246	0.00176319	0.74865	0.00495561	set1
DGKH	DGKH	ENSG00000102780	0.401219	0.0315682	0.218115	0.169339	-0.187693	0.49943	set3
SIAH3	SIAH3	ENSG00000215475	-0.739682	0.298255	-1.12117	0.00227072	-0.385663	0.565528	set2
RN7SL288P	RN7SL288P	ENSG00000240767	-0.101145	0.944028	0.552652	0.0126542	0.649375	0.00545096	set1
RCBTB2	RCBTB2	ENSG00000136161	-0.286267	0.158943	-0.499313	5.06016e-05	-0.217646	0.241835	set2
CYSLTR2	CYSLTR2	ENSG00000152207	0.0796924	0.95258	0.720402	0.000189847	0.636223	0.00278105	set1
RNU6-60P	RNU6-60P	ENSG00000201662	0.149799	0.952934	1.0894	0.0189102	0.934729	0.13394	set2
ARL11	ARL11	ENSG00000152213	-0.291917	0.0515462	-0.333388	0.00377502	-0.0459296	0.889364	set2
INTS6-AS1	INTS6-AS1	ENSG00000236778	-0.0599311	0.978666	-0.724347	0.00346913	-0.669131	0.0153557	set1
DACH1	DACH1	ENSG00000276644	0.259947	0.0312257	0.326915	6.76568e-06	0.0621271	0.74788	set3
BORA	BORA	ENSG00000136122	-0.214211	0.197255	-0.350675	1.63451e-05	-0.140762	0.30287	set2
DIS3	DIS3	ENSG00000083520	0.0472226	0.940199	0.213247	0.00694525	0.161573	0.0682822	set2
TBC1D4	TBC1D4	ENSG00000136111	0.475218	0.000377903	0.525082	1.72848e-05	0.0452142	0.922199	set3
KCTD12	KCTD12	ENSG00000178695	-0.318889	0.0154404	-0.595625	2.35662e-12	-0.281439	0.00400824	set1
FBXL3	FBXL3	ENSG00000005812	0.088329	0.827392	0.237255	0.00559109	0.144575	0.247633	set2
MIR17HG	MIR17HG	ENSG00000215417	-0.116149	0.767424	0.344756	0.00770506	0.45632	7.96032e-05	set1
ABCC4	ABCC4	ENSG00000125257	0.0825216	0.854009	0.201195	0.0418797	0.114077	0.508612	set2
DNAJC3-AS1	DNAJC3-AS1	ENSG00000247400	-0.249708	0.546824	-0.413554	0.0187016	-0.168696	0.615609	set2
DNAJC3	DNAJC3	ENSG00000102580	0.0941993	0.768392	0.20632	0.00962642	0.107603	0.323159	set2
RAP2A	RAP2A	ENSG00000125249	0.294559	0.506216	0.460513	0.0185642	0.161576	0.762424	set2
RN7SKP9	RN7SKP9	ENSG00000201793	-0.488932	0.169123	-0.658264	0.0018034	-0.174147	0.781476	set2
GPR183	GPR183	ENSG00000169508	0.407871	0.00262429	1.17463	1.70163e-35	0.762401	1.08162e-14	set1
	AL356966.1	ENSG00000224356	-0.44347	0.543511	-0.751738	0.0156968	-0.313258	0.609278	set2
IRS2	IRS2	ENSG00000185950	-0.0960735	0.896002	0.495016	6.77593e-05	0.585979	5.11869e-06	set1
	AL139384.1	ENSG00000274922	-0.489445	0.239331	-0.519108	0.0467934	-0.0336597	0.96798	set2
DCUN1D2	DCUN1D2	ENSG00000150401	0.324753	0.0581059	0.303614	0.0130227	-0.0256397	0.953003	set2
GAS6-AS1	GAS6-AS1	ENSG00000233695	-0.0375797	0.963944	-0.239214	0.0423555	-0.206408	0.039194	set1
RASA3	RASA3	ENSG00000185989	0.230511	0.161229	0.405936	4.59946e-06	0.170491	0.215929	set2
RAB2B	RAB2B	ENSG00000129472	0.0218086	0.984127	0.272233	0.017228	0.245762	0.0880512	set2
CEBPE	CEBPE	ENSG00000092067	-0.176999	0.276744	-0.321212	6.93871e-06	-0.148995	0.141028	set2
HOMEZ	HOMEZ	ENSG00000215271	-0.136263	0.706077	-0.337445	0.000947403	-0.206185	0.157462	set2
PPP1R3E	PPP1R3E	ENSG00000235194	0.051595	0.972446	-0.501846	0.00382972	-0.557615	0.000566281	set1
NGDN	NGDN	ENSG00000129460	-0.0238704	0.981326	0.264738	0.0283467	0.284028	0.0338932	set1
ZFHX2	ZFHX2	ENSG00000136367	-0.19167	0.82928	-0.645178	0.000396041	-0.459214	0.0728217	set2
NOP9	NOP9	ENSG00000196943	-0.114941	0.723929	-0.204213	0.0349218	-0.0942075	0.47468	set2
LTB4R	LTB4R	ENSG00000213903	-0.131093	0.687564	-0.292048	0.00241165	-0.165823	0.0658562	set2
G2E3	G2E3	ENSG00000092140	-0.196411	0.313496	-0.287719	0.00227072	-0.095583	0.549886	set2
HEATR5A	HEATR5A	ENSG00000129493	-0.249485	0.399528	-0.357288	0.0171955	-0.112284	0.759846	set2
CFL2	CFL2	ENSG00000165410	0.173332	0.686271	0.321918	0.0436666	0.143788	0.709245	set2
BAZ1A	BAZ1A	ENSG00000198604	0.239845	0.0336214	0.347513	2.64019e-07	0.103173	0.355918	set3
RNU7-41P	RNU7-41P	ENSG00000251726	0.397095	0.670728	1.09232	0.0035968	0.690725	0.249797	set2
NFKBIA	NFKBIA	ENSG00000100906	0.961158	2.50463e-18	2.5738	3.27588e-151	1.60805	2.9941e-46	set1
BRMS1L	BRMS1L	ENSG00000100916	0.342396	0.181813	0.487682	0.00229132	0.140719	0.735925	set2
RPS29	RPS29	ENSG00000213741	-0.255379	0.110427	-0.325286	0.000164194	-0.0746599	0.788338	set2
RPL36AL	RPL36AL	ENSG00000165502	0.0614676	0.887858	0.164647	0.0454693	0.0986453	0.466244	set2
RN7SL3	RN7SL3	ENSG00000278771	-0.548273	0.13889	-0.75527	0.000123643	-0.212354	0.695566	set2
RN7SL2	RN7SL2	ENSG00000274012	-0.509385	0.630112	-0.913647	0.00393502	-0.409046	0.440961	set2
CDKL1	CDKL1	ENSG00000100490	-0.121289	0.887278	-0.355357	0.0351516	-0.238306	0.335157	set2
MAP4K5	MAP4K5	ENSG00000012983	-0.060448	0.916216	-0.201912	0.0181865	-0.146076	0.240859	set2
ATL1	ATL1	ENSG00000198513	-0.682521	0.0490098	-0.596003	0.0362684	0.0820965	0.918779	set3
GNG2	GNG2	ENSG00000186469	-0.195835	0.166086	-0.215252	0.00905089	-0.0240155	0.915755	set2
PTGER2	PTGER2	ENSG00000125384	0.0965659	0.887858	0.63257	5.63852e-07	0.531375	0.000223077	set1
FBXO34	FBXO34	ENSG00000178974	0.215528	0.237807	0.312383	0.00118116	0.0924231	0.695375	set2
PELI2	PELI2	ENSG00000139946	0.670678	0.000630385	0.688068	4.42362e-05	0.0127808	0.989542	set3
TMEM260	TMEM260	ENSG00000070269	-0.117418	0.695382	-0.230498	0.0128487	-0.117527	0.5204	set2
ARID4A	ARID4A	ENSG00000032219	0.115343	0.683456	0.278644	0.000299063	0.158922	0.13767	set2
GPR135	GPR135	ENSG00000181619	-0.0192988	0.985662	-0.484721	0.00962347	-0.470138	0.0347509	set1
L3HYPDH	L3HYPDH	ENSG00000126790	-0.0552679	0.959789	-0.379115	0.0111678	-0.328362	0.0636856	set2
HIF1A	HIF1A	ENSG00000100644	0.0986314	0.750348	0.276251	0.000170492	0.173138	0.133126	set2
WDR89	WDR89	ENSG00000140006	-0.150952	0.748412	-0.303669	0.0313607	-0.157303	0.565869	set2
PLEKHG3	PLEKHG3	ENSG00000126822	0.10913	0.759529	0.261665	0.00818432	0.147827	0.358611	set2
TMEM229B	TMEM229B	ENSG00000198133	-0.385246	0.739573	-0.769392	0.0277653	-0.389414	0.55362	set2
SRSF5	SRSF5	ENSG00000100650	0.0491766	0.930941	0.264044	6.60356e-05	0.210364	0.0206601	set1
PCNX1	PCNX1	ENSG00000100731	0.276753	0.0150709	0.281412	0.000255267	0.000226006	0.999178	set3
PSEN1	PSEN1	ENSG00000080815	0.1334	0.619031	0.277015	0.000427725	0.139242	0.366004	set2
ELMSAN1	ELMSAN1	ENSG00000156030	0.0985314	0.81693	0.274953	0.00296448	0.171505	0.181675	set2
NEK9	NEK9	ENSG00000119638	-0.12139	0.65722	-0.237178	0.0104495	-0.120476	0.414771	set2
FOS	FOS	ENSG00000170345	0.0437878	0.967374	2.31061	1.3741e-71	2.26199	5.63414e-91	set1
GPATCH2L	GPATCH2L	ENSG00000089916	0.127748	0.595698	0.201647	0.00796473	0.069496	0.722486	set2
ANGEL1	ANGEL1	ENSG00000013523	-0.0453403	0.962804	-0.242081	0.0432476	-0.201395	0.275976	set2
IRF2BPL	IRF2BPL	ENSG00000119669	0.0246679	0.985662	0.598976	0.0136008	0.569874	0.0422887	set1
VIPAS39	VIPAS39	ENSG00000151445	-0.157528	0.705077	-0.297288	0.0267774	-0.144278	0.603222	set2
GTF2A1	GTF2A1	ENSG00000165417	-0.120065	0.736228	-0.24296	0.0110975	-0.127926	0.437505	set2
RN7SKP255	RN7SKP255	ENSG00000200312	-0.579654	0.528329	-0.996453	8.99669e-18	-0.422546	0.674899	set2
RPS6KA5	RPS6KA5	ENSG00000100784	0.254737	0.172691	0.31073	0.00180979	0.0516753	0.877917	set2
DGLUCY	DGLUCY	ENSG00000133943	-0.148983	0.525704	-0.283643	0.00132075	-0.139597	0.212615	set2
CPSF2	CPSF2	ENSG00000165934	-0.159954	0.326622	-0.231507	0.00346214	-0.0760451	0.625039	set2
ASB2	ASB2	ENSG00000100628	-0.0682967	0.928768	-0.28526	0.0272753	-0.221998	0.0880326	set2
DDX24	DDX24	ENSG00000089737	0.0500756	0.928768	0.245742	0.00184942	0.191163	0.0279415	set1
SCARNA13	SCARNA13	ENSG00000252481	-0.537778	0.398213	-0.734012	2.28623e-09	-0.201912	0.814228	set2
ATG2B	ATG2B	ENSG00000066739	0.103246	0.695246	0.189459	0.0274795	0.0815692	0.650838	set2
EVL	EVL	ENSG00000196405	-0.109262	0.619381	-0.175641	0.0204122	-0.0711343	0.644188	set2
YY1	YY1	ENSG00000100811	0.0593872	0.899914	0.17572	0.0232103	0.11154	0.361649	set2
MOK	MOK	ENSG00000080823	0.594255	0.186551	1.31006	1.50791e-05	0.711001	0.173887	set2
TECPR2	TECPR2	ENSG00000196663	-0.27471	0.40144	-0.405823	0.0110143	-0.136629	0.666635	set2
TRAF3	TRAF3	ENSG00000131323	0.131254	0.694936	0.297439	0.00427575	0.161414	0.404328	set2
TNFAIP2	TNFAIP2	ENSG00000185215	0.556765	2.17946e-08	0.450072	6.95154e-11	-0.111567	0.524341	set3
EIF5	EIF5	ENSG00000100664	0.027578	0.963655	0.39528	6.39132e-10	0.36318	2.04571e-10	set1
	AL133367.1	ENSG00000260285	-0.190064	0.909505	-0.657423	0.0194032	-0.47098	0.229004	set2
BAG5	BAG5	ENSG00000166170	0.0826313	0.834007	0.211261	0.0182	0.123999	0.355918	set2
KLC1	KLC1	ENSG00000126214	0.192767	0.195574	0.249536	0.00245421	0.0521203	0.809136	set2
ZFYVE21	ZFYVE21	ENSG00000100711	0.285827	0.147198	0.490383	1.52682e-05	0.200033	0.280471	set2
INF2	INF2	ENSG00000203485	0.391011	0.110427	0.425323	0.0114807	0.0295729	0.953923	set2
LINC00638	LINC00638	ENSG00000258701	-0.321766	0.88211	-1.01525	0.00922858	-0.699712	0.189077	set2
GPR132	GPR132	ENSG00000183484	0.639535	3.46338e-07	0.653028	1.11469e-09	0.00870731	0.989171	set3
TEDC1	TEDC1	ENSG00000185347	0.303743	0.330133	0.617693	1.69332e-05	0.309079	0.19307	set2
NIPA2	NIPA2	ENSG00000140157	0.0213656	0.976752	0.200383	0.0180788	0.174504	0.112041	set2
SNHG14	SNHG14	ENSG00000224078	-0.0643736	0.923355	-0.276995	0.0054308	-0.217161	0.0864233	set2
	AC087481.3	ENSG00000270015	0.362299	0.0216046	0.409831	0.000688987	0.0428844	0.920878	set3
MEIS2	MEIS2	ENSG00000134138	-0.148655	0.506216	-0.258143	0.00299743	-0.114331	0.484861	set2
THBS1	THBS1	ENSG00000137801	-0.376547	0.182312	-0.576971	0.000697851	-0.20509	0.576539	set2
SRP14-AS1	SRP14-AS1	ENSG00000248508	-0.469391	0.201313	-0.68796	0.000824938	-0.223643	0.613174	set2
BMF	BMF	ENSG00000104081	0.828703	0.000343914	0.829805	1.65628e-06	-0.00362039	0.998022	set3
DISP2	DISP2	ENSG00000140323	-0.415323	0.701948	-0.902095	0.00683329	-0.492394	0.35566	set2
KNSTRN	KNSTRN	ENSG00000128944	-0.130159	0.716735	-0.241712	0.0315801	-0.116047	0.474055	set2
IVD	IVD	ENSG00000128928	-0.279705	0.511049	-0.644827	8.28712e-05	-0.369411	0.109191	set2
INO80	INO80	ENSG00000128908	0.0975426	0.749516	0.217348	0.011386	0.115144	0.413748	set2
EHD4	EHD4	ENSG00000103966	0.248102	0.182312	0.408047	0.000151833	0.155194	0.404791	set2
TMEM87A	TMEM87A	ENSG00000103978	0.107043	0.763215	0.268826	0.00357285	0.157383	0.176862	set2
CAPN3	CAPN3	ENSG00000092529	-0.37204	0.339002	-0.456603	0.021591	-0.0895818	0.876136	set2
TGM5	TGM5	ENSG00000104055	-0.190437	0.394254	-0.260939	0.000833342	-0.0751426	0.786625	set2
TUBGCP4	TUBGCP4	ENSG00000137822	0.121083	0.622843	0.237886	0.00695019	0.11217	0.503311	set2
SPG11	SPG11	ENSG00000104133	-0.111218	0.571124	-0.238858	0.000170492	-0.132221	0.171353	set2
TRIM69	TRIM69	ENSG00000185880	-0.439871	0.184165	-0.788401	5.88894e-06	-0.352069	0.170139	set2
GALK2	GALK2	ENSG00000156958	-0.0693826	0.895031	-0.259185	0.00180979	-0.194264	0.100191	set2
	AC022306.2	ENSG00000275580	-0.524839	0.573334	-0.790828	0.0395255	-0.269448	0.745613	set2
TMOD2	TMOD2	ENSG00000128872	-0.225994	0.23873	-0.328824	0.00150459	-0.107353	0.550041	set2
MAPK6	MAPK6	ENSG00000069956	0.0814505	0.820785	0.239791	0.00231876	0.153816	0.131514	set2
ICE2	ICE2	ENSG00000128915	-0.109481	0.652189	-0.257544	0.000533699	-0.15264	0.132922	set2
LACTB	LACTB	ENSG00000103642	0.463103	0.00297354	0.46822	0.000129534	0.000374372	0.999178	set3
RAB8B	RAB8B	ENSG00000166128	0.205706	0.246661	0.264519	0.00401082	0.0543511	0.852073	set2
DAPK2	DAPK2	ENSG00000035664	-0.143476	0.599573	-0.235291	0.0103834	-0.0965491	0.653017	set2
	AC087632.1	ENSG00000259316	0.383142	0.60765	0.643687	0.0472757	0.255951	0.745162	set2
PIF1	PIF1	ENSG00000140451	-0.261703	0.405248	-0.505625	0.000316513	-0.248455	0.273745	set2
ANKDD1A	ANKDD1A	ENSG00000166839	0.439593	0.0472083	0.650391	3.16423e-06	0.206241	0.54401	set3
SLC24A1	SLC24A1	ENSG00000074621	-0.181875	0.800203	-0.418547	0.0280446	-0.2415	0.493217	set2
DENND4A	DENND4A	ENSG00000174485	0.504851	2.88065e-06	0.741591	2.018e-24	0.232388	0.0420542	set1
SNORD13E	SNORD13E	ENSG00000238311	0.939951	0.0641787	1.29141	0.00167206	0.345873	0.796591	set2
	AC011939.2	ENSG00000261544	0.206869	0.868319	1.32738	1.89296e-07	1.11504	0.00105861	set1
	AC011939.1	ENSG00000259924	0.220295	0.808552	1.11863	1.00848e-11	0.893505	0.000628864	set1
DIS3L	DIS3L	ENSG00000166938	-0.139	0.619031	-0.237458	0.0179161	-0.103248	0.630165	set2
SMAD3	SMAD3	ENSG00000166949	0.34907	0.00191134	0.364337	8.14761e-06	0.0105592	0.976794	set3
TLE3	TLE3	ENSG00000140332	-0.0918359	0.888903	-0.214273	0.019429	-0.127374	0.568325	set2
NPTN-IT1	NPTN-IT1	ENSG00000281183	0.610207	0.00864842	0.585945	0.000982748	-0.0283723	0.968374	set3
SEMA7A	SEMA7A	ENSG00000138623	0.284015	0.480689	0.607152	0.00128289	0.318221	0.293121	set2
CLK3	CLK3	ENSG00000179335	-0.054596	0.926167	0.251068	0.00144978	0.300974	0.000526183	set1
SIN3A	SIN3A	ENSG00000169375	0.1679	0.359108	0.274264	3.25831e-05	0.101602	0.579562	set2
MTHFS	MTHFS	ENSG00000136371	-0.163665	0.944508	-0.825517	0.0104654	-0.666723	0.0989739	set2
	AC015871.4	ENSG00000279394	0.424818	0.758582	-1.01063	0.00132007	-1.44037	5.67342e-06	set1
ST20	ST20	ENSG00000180953	-0.129758	0.868319	-0.49097	0.00065397	-0.365438	0.0359805	set1
	AC015871.3	ENSG00000278600	0.0209141	0.984555	-0.279584	0.0131902	-0.305022	0.0124466	set1
BCL2A1	BCL2A1	ENSG00000140379	-0.297864	0.0150709	-0.27802	0.000982748	0.0153176	0.960699	set3
IL16	IL16	ENSG00000172349	-0.288242	0.0782518	-0.528685	2.71313e-09	-0.245303	0.0459026	set1
HOMER2	HOMER2	ENSG00000103942	-0.181107	0.82501	-0.64947	0.000154173	-0.472968	0.0287986	set1
SCAND2P	SCAND2P	ENSG00000176700	-0.072943	0.941834	-0.339198	0.00612141	-0.270235	0.117058	set2
AKAP13	AKAP13	ENSG00000170776	-0.30744	0.00148087	-0.336818	2.45074e-05	-0.0339857	0.888545	set3
DET1	DET1	ENSG00000140543	-0.229658	0.526669	-0.448062	0.0019797	-0.222817	0.237644	set2
AEN	AEN	ENSG00000181026	0.0316227	0.981326	0.404093	0.00637729	0.367406	0.0135521	set1
ZNF710	ZNF710	ENSG00000140548	-0.185113	0.394134	-0.287804	0.00364833	-0.107606	0.624053	set2
SEMA4B	SEMA4B	ENSG00000185033	-0.201985	0.551218	-0.377057	0.00310408	-0.180422	0.361272	set2
GDPGP1	GDPGP1	ENSG00000183208	-0.509356	0.101629	-0.633419	0.00172241	-0.129422	0.789728	set2
ZNF774	ZNF774	ENSG00000196391	0.111868	0.932443	-0.468334	0.00914482	-0.584409	0.00416485	set1
FES	FES	ENSG00000182511	-0.0783908	0.881124	-0.22394	0.0110975	-0.150442	0.207717	set2
MAN2A2	MAN2A2	ENSG00000196547	0.25005	0.0490098	0.256891	0.00264379	0.00205431	0.996163	set3
CHD2	CHD2	ENSG00000173575	0.137625	0.483088	0.187307	0.0111568	0.0451448	0.828353	set2
NR2F2-AS1	NR2F2-AS1	ENSG00000247809	-0.350871	0.326481	-0.536088	0.0053683	-0.18982	0.604487	set2
	AC016251.1	ENSG00000279645	-0.694664	0.466179	-1.1437	0.0054014	-0.45489	0.570806	set2
NR2F2	NR2F2	ENSG00000185551	-0.464883	0.00222937	-0.595239	4.54876e-08	-0.135424	0.620696	set3
SPATA8-AS1	SPATA8-AS1	ENSG00000259282	-0.497173	0.624435	-1.14512	0.000336256	-0.654968	0.104071	set2
ARRDC4	ARRDC4	ENSG00000140450	0.385295	0.020011	0.166035	0.246451	-0.22374	0.246845	set3
TTC23	TTC23	ENSG00000103852	-0.206856	0.651771	-0.481018	0.00136603	-0.278627	0.203841	set2
TARSL2	TARSL2	ENSG00000185418	0.257045	0.326481	1.28649	1.408e-19	1.02478	1.53111e-12	set1
NPRL3	NPRL3	ENSG00000103148	-0.192319	0.687403	-0.289204	0.0379577	-0.102636	0.773597	set2
AXIN1	AXIN1	ENSG00000103126	0.258276	0.204556	0.455077	9.29766e-06	0.191836	0.281399	set2
WDR90	WDR90	ENSG00000161996	0.279474	0.397569	0.388364	0.0270801	0.103984	0.763199	set2
CRAMP1	CRAMP1	ENSG00000007545	0.260658	0.166086	0.32591	0.00194314	0.0602661	0.857889	set2
EME2	EME2	ENSG00000197774	0.299164	0.110427	0.267015	0.0412407	-0.0367866	0.922823	set2
MSRB1	MSRB1	ENSG00000198736	0.0544703	0.939601	0.253857	0.0145445	0.194782	0.175994	set2
RPS2	RPS2	ENSG00000140988	-0.00709594	0.991316	0.216188	0.00189606	0.218621	0.00467322	set1
ZNF598	ZNF598	ENSG00000167962	0.204286	0.534738	0.367476	0.00842879	0.15786	0.440961	set2
CCNF	CCNF	ENSG00000162063	-0.148121	0.709101	-0.253255	0.00383189	-0.110014	0.70292	set2
ATP6V0C	ATP6V0C	ENSG00000185883	0.0324543	0.981555	0.336237	0.0181441	0.2987	0.269989	set2
	AC093525.8	ENSG00000279520	0.0468471	0.971695	0.394591	0.0309332	0.343254	0.142194	set2
TNFRSF12A	TNFRSF12A	ENSG00000006327	0.71258	3.91874e-06	0.901209	4.00721e-12	0.184082	0.589285	set3
MMP25-AS1	MMP25-AS1	ENSG00000261971	-0.0962712	0.887858	-0.306443	0.0191092	-0.215378	0.215929	set2
ZNF213-AS1	ZNF213-AS1	ENSG00000263072	-0.0928104	0.92738	-0.367619	0.0270465	-0.279458	0.195903	set2
ZNF597	ZNF597	ENSG00000167981	-0.00797433	0.993478	0.333627	0.0216024	0.336981	0.108742	set2
DNASE1	DNASE1	ENSG00000213918	-0.208411	0.430895	-0.586975	4.51504e-08	-0.383301	1.57585e-06	set1
UBALD1	UBALD1	ENSG00000153443	0.116774	0.856495	0.544695	8.24577e-06	0.423067	0.00593392	set1
PMM2	PMM2	ENSG00000140650	0.0781524	0.887858	0.278977	0.0103809	0.196019	0.167094	set2
NUBP1	NUBP1	ENSG00000103274	0.135472	0.752635	0.285863	0.0313701	0.145663	0.590671	set2
SOCS1	SOCS1	ENSG00000185338	-0.274972	0.790591	-0.695414	0.00759787	-0.425239	0.268669	set2
ERCC4	ERCC4	ENSG00000175595	-0.107069	0.84939	-0.340421	0.00287735	-0.237947	0.147917	set2
COQ7	COQ7	ENSG00000167186	0.129577	0.73667	0.243828	0.033611	0.109656	0.695375	set2
C16orf62	C16orf62	ENSG00000103544	-0.130541	0.52363	-0.172841	0.0465383	-0.046871	0.831457	set2
ERI2	ERI2	ENSG00000196678	-0.224848	0.227201	-0.485575	4.64519e-08	-0.26495	0.00324733	set1
REXO5	REXO5	ENSG00000005189	-0.0599161	0.952186	-0.327914	0.0133682	-0.272265	0.046646	set1
DCUN1D3	DCUN1D3	ENSG00000188215	0.199551	0.467374	0.488331	1.57434e-05	0.284173	0.117363	set2
LYRM1	LYRM1	ENSG00000102897	-0.208014	0.630993	-0.361215	0.0300523	-0.157655	0.646747	set2
SMG1P3	SMG1P3	ENSG00000180747	0.190718	0.167077	0.221171	0.00204264	0.025798	0.920244	set2
SMG1P4	SMG1P4	ENSG00000185710	0.173206	0.321089	0.175291	0.0194032	-0.00249078	0.99585	set2
SMG1P1	SMG1P1	ENSG00000237296	0.153688	0.420964	0.231382	0.00372897	0.073189	0.729422	set2
RBBP6	RBBP6	ENSG00000122257	-0.0119895	0.984958	0.225449	0.00216144	0.23289	0.000487056	set1
NSMCE1	NSMCE1	ENSG00000169189	-0.192229	0.471714	-0.245889	0.0496059	-0.0578254	0.858642	set2
	FLJ21408	ENSG00000245888	-0.37343	0.831454	-1.02415	0.010278	-0.656305	0.234195	set2
NFATC2IP	NFATC2IP	ENSG00000176953	0.112271	0.685628	0.177259	0.0350511	0.0602328	0.78719	set2
NPIPB12	NPIPB12	ENSG00000169203	0.242956	0.0369015	0.196743	0.0173008	-0.0508624	0.814603	set3
SMG1P2	SMG1P2	ENSG00000205534	0.212852	0.126607	0.27025	0.0004437	0.0529575	0.814228	set2
SPN	SPN	ENSG00000197471	-0.156312	0.586177	-0.187709	0.021897	-0.0362284	0.911669	set2
C16orf54	C16orf54	ENSG00000185905	0.273755	0.156339	0.640208	1.93139e-10	0.361718	0.00936628	set1
KCTD13	KCTD13	ENSG00000174943	0.0985703	0.834007	0.259381	0.0367343	0.156133	0.491752	set2
DOC2A	DOC2A	ENSG00000149927	-0.40637	0.429188	-0.704605	0.0022536	-0.303878	0.407443	set2
SMG1P5	SMG1P5	ENSG00000183604	0.238402	0.170261	0.212734	0.0101271	-0.0301213	0.93338	set2
CD2BP2	CD2BP2	ENSG00000169217	0.0683616	0.889958	0.178798	0.0379809	0.105786	0.545324	set2
ITGAL	ITGAL	ENSG00000005844	-0.225708	0.40617	-0.358671	0.00365337	-0.137821	0.657716	set2
FBRS	FBRS	ENSG00000156860	0.0354674	0.963655	0.208387	0.0220778	0.167892	0.168183	set2
SETD1A	SETD1A	ENSG00000099381	0.104783	0.800259	0.219811	0.0413796	0.110066	0.610416	set2
ZNF646	ZNF646	ENSG00000167395	-0.117071	0.805408	-0.242682	0.0282068	-0.130848	0.479505	set2
ITGAM	ITGAM	ENSG00000169896	-0.188892	0.398401	-0.247859	0.0270931	-0.0637101	0.782005	set2
ARMC5	ARMC5	ENSG00000140691	0.0045027	0.995028	0.33883	0.00504456	0.329355	0.0287464	set1
ZNF720	ZNF720	ENSG00000197302	-0.120544	0.702178	-0.216985	0.0296385	-0.100978	0.617404	set2
ZNF267	ZNF267	ENSG00000185947	-0.0220223	0.976455	0.373421	2.0596e-07	0.390998	2.65192e-08	set1
CYLD	CYLD	ENSG00000083799	0.128427	0.597067	0.218577	0.0141103	0.0856398	0.63962	set2
NLRC5	NLRC5	ENSG00000140853	-0.165016	0.579999	-0.256674	0.0313674	-0.0965518	0.548673	set2
ADGRG5	ADGRG5	ENSG00000159618	-0.0164098	0.984555	-0.218002	0.0103365	-0.20656	0.0310938	set1
KIFC3	KIFC3	ENSG00000140859	0.929314	6.48131e-11	1.31121	8.03266e-21	0.377106	0.168845	set3
ZNF319	ZNF319	ENSG00000166188	-0.11001	0.905274	-0.318885	0.0246344	-0.214761	0.404585	set2
LINC00920	LINC00920	ENSG00000246898	-0.266262	0.591256	-0.50951	0.0011806	-0.247155	0.441603	set2
TK2	TK2	ENSG00000166548	-0.132859	0.70274	-0.339489	0.00132007	-0.211194	0.137954	set2
DYNC1LI2	DYNC1LI2	ENSG00000135720	0.139197	0.464322	0.17969	0.0110343	0.0359897	0.872932	set2
LRRC29	LRRC29	ENSG00000125122	-0.178352	0.91999	-0.587507	0.0497462	-0.41371	0.341202	set2
FHOD1	FHOD1	ENSG00000135723	0.274517	0.176372	0.241934	0.0245074	-0.0377941	0.920709	set2
DUS2	DUS2	ENSG00000167264	-0.0788208	0.924298	-0.27286	0.0346283	-0.198979	0.344183	set2
NFATC3	NFATC3	ENSG00000072736	0.107553	0.683631	0.176266	0.0434542	0.0641724	0.724532	set2
SLC7A6OS	SLC7A6OS	ENSG00000103061	0.0916436	0.827392	0.309203	0.00174316	0.21293	0.121836	set2
ZFP90	ZFP90	ENSG00000184939	-0.286655	0.239331	-0.509611	4.4937e-05	-0.227511	0.211016	set2
CHTF8	CHTF8	ENSG00000168802	-0.229434	0.0695411	-0.322007	7.91037e-06	-0.0973242	0.548273	set2
UTP4	UTP4	ENSG00000141076	0.123268	0.67135	0.284389	0.00223498	0.156453	0.208858	set2
NIP7	NIP7	ENSG00000132603	0.00821825	0.991536	0.342718	0.000761296	0.329902	0.00203347	set1
	PDXDC2P-NPIPB14P	ENSG00000196696	0.348964	0.463018	0.459205	0.0340684	0.106255	0.88325	set2
PDXDC2P	PDXDC2P	ENSG00000255185	0.403639	0.726037	0.948118	0.0220733	0.540183	0.532903	set2
AARS	AARS	ENSG00000090861	-0.188164	0.289409	-0.250412	0.00277081	-0.0671602	0.754963	set2
DDX19B	DDX19B	ENSG00000157349	-0.0414915	0.963655	0.272036	0.0470718	0.308849	0.0394841	set1
COG4	COG4	ENSG00000103051	-0.127085	0.703586	-0.243803	0.0215067	-0.121445	0.481075	set2
ATXN1L	ATXN1L	ENSG00000224470	0.0609936	0.906158	0.256391	0.00154645	0.190615	0.0866528	set2
	AC004943.2	ENSG00000259768	-0.203937	0.661474	-0.455835	0.00270928	-0.256757	0.218681	set2
CMC2	CMC2	ENSG00000103121	0.229759	0.182409	0.264185	0.0103778	0.0298367	0.926615	set2
	AC092718.7	ENSG00000278985	0.16006	0.890347	0.580247	0.0327354	0.415287	0.355918	set2
CENPN	CENPN	ENSG00000166451	0.1042	0.848859	0.365004	0.00253291	0.25608	0.0599797	set2
MLYCD	MLYCD	ENSG00000103150	-0.113081	0.780053	-0.296185	0.00237402	-0.188003	0.162797	set2
OSGIN1	OSGIN1	ENSG00000140961	1.08707	0.00799703	1.28083	0.000431955	0.190708	0.89959	set3
KLHL36	KLHL36	ENSG00000135686	-0.160997	0.439305	-0.215241	0.0134809	-0.0592438	0.788338	set2
SNAI3-AS1	SNAI3-AS1	ENSG00000260630	-0.312354	0.724287	-0.680019	0.00936964	-0.372087	0.403415	set2
GALNS	GALNS	ENSG00000141012	0.258631	0.191359	0.304218	0.0142827	0.0406255	0.911923	set2
	AC092384.3	ENSG00000261226	0.690542	0.00476906	0.215716	0.412239	-0.479359	0.117837	set3
ZNF276	ZNF276	ENSG00000158805	0.221243	0.416252	0.428538	0.00155261	0.202618	0.441796	set2
DEF8	DEF8	ENSG00000140995	-0.270463	0.109509	-0.36719	0.000173666	-0.101736	0.588445	set2
CENPBD1	CENPBD1	ENSG00000177946	-0.498899	0.20717	-0.643636	0.010021	-0.149411	0.813618	set2
SLC43A2	SLC43A2	ENSG00000167703	0.323671	0.287302	0.361689	0.046962	0.0332839	0.959879	set2
MIR22HG	MIR22HG	ENSG00000186594	0.532268	0.141824	1.44892	1.90063e-10	0.911745	0.00661892	set1
DPH1	DPH1	ENSG00000108963	0.391024	0.153918	0.389893	0.0497195	-0.00593415	0.995481	set2
MNT	MNT	ENSG00000070444	0.265903	0.109509	0.431286	2.3506e-06	0.160444	0.394009	set2
ZNF594	ZNF594	ENSG00000180626	-0.169956	0.87951	-0.537844	0.0183402	-0.372519	0.258191	set2
NLRP1	NLRP1	ENSG00000091592	-0.254843	0.793372	-0.541494	0.0449127	-0.291851	0.557636	set2
	AC027763.1	ENSG00000262503	0.287256	0.169126	0.451255	2.84553e-07	0.159404	0.54084	set2
SLC16A13	SLC16A13	ENSG00000174327	-0.56797	0.127905	-0.63541	0.00842678	-0.0732587	0.920052	set2
PHF23	PHF23	ENSG00000040633	0.199249	0.475221	0.26935	0.0458603	0.0654234	0.861327	set2
EIF4A1	EIF4A1	ENSG00000161960	0.0822655	0.915077	0.63271	1.09879e-08	0.545851	2.83802e-05	set1
KDM6B	KDM6B	ENSG00000132510	0.500008	0.00102377	0.642219	8.63278e-08	0.137348	0.491752	set3
SCARNA21	SCARNA21	ENSG00000252835	-0.441895	0.687903	-0.564797	9.31272e-06	-0.128622	0.923795	set2
PER1	PER1	ENSG00000179094	0.622971	0.0277467	0.993407	3.87827e-07	0.3651	0.413748	set3
NDEL1	NDEL1	ENSG00000166579	0.210936	0.50844	0.300004	0.0369779	0.0846446	0.833395	set2
GAS7	GAS7	ENSG00000007237	0.18703	0.214883	0.279121	3.84076e-05	0.0872613	0.615961	set2
HS3ST3B1	HS3ST3B1	ENSG00000125430	-0.386222	0.200557	-0.446981	0.012321	-0.0665571	0.879616	set2
RAI1	RAI1	ENSG00000108557	0.143659	0.71929	0.233244	0.0423555	0.0845071	0.786625	set2
LGALS9C	LGALS9C	ENSG00000171916	-0.058831	0.954012	-0.363175	0.014542	-0.309196	0.122325	set2
FAM83G	FAM83G	ENSG00000188522	0.430076	0.460238	0.800484	0.00525399	0.366012	0.581307	set2
	AC007952.4	ENSG00000262202	-0.250015	0.688026	0.526312	0.0333978	0.771549	0.0014334	set1
SNORD3A	SNORD3A	ENSG00000263934	-1.30525	0.403129	-2.26076	9.25199e-23	-0.960194	0.532903	set2
MAPK7	MAPK7	ENSG00000166484	0.0455481	0.969936	0.346833	0.0293244	0.296256	0.201705	set2
SPECC1	SPECC1	ENSG00000128487	-0.165701	0.306471	-0.183649	0.0151454	-0.022521	0.93407	set2
KCTD9P1	KCTD9P1	ENSG00000225014	0.238298	0.765631	-0.462581	0.0441454	-0.705456	0.00221709	set1
LGALS9B	LGALS9B	ENSG00000170298	-0.351993	0.32785	-0.559668	0.00504708	-0.212626	0.596514	set2
DHRS7B	DHRS7B	ENSG00000109016	-0.163139	0.694936	-0.466518	0.000140332	-0.308009	0.0178073	set1
KSR1	KSR1	ENSG00000141068	-0.152808	0.672142	-0.226276	0.0362684	-0.0786881	0.77956	set2
TMEM97	TMEM97	ENSG00000109084	0.05423	0.944508	0.294018	0.00840503	0.235435	0.0240328	set1
SDF2	SDF2	ENSG00000132581	0.104462	0.805408	0.271491	0.0128051	0.162384	0.380181	set2
TRAF4	TRAF4	ENSG00000076604	0.232917	0.820839	0.676656	0.0242882	0.438811	0.398482	set2
NUFIP2	NUFIP2	ENSG00000108256	0.0673349	0.838417	0.13791	0.0451034	0.0660086	0.641925	set2
ADAP2	ADAP2	ENSG00000184060	-0.325947	0.525246	-0.530805	0.0147477	-0.209311	0.62205	set2
RNF135	RNF135	ENSG00000181481	-0.212811	0.548569	-0.310197	0.0447024	-0.1023	0.782005	set2
PSMD11	PSMD11	ENSG00000108671	0.0681546	0.856567	0.253364	0.000364916	0.180524	0.0404106	set1
CCL2	CCL2	ENSG00000108691	0.177402	0.308948	0.524664	1.29737e-21	0.342693	1.2036e-05	set1
SLFN5	SLFN5	ENSG00000166750	-0.445473	0.122179	-0.613663	0.000833342	-0.172401	0.615961	set2
SLFN11	SLFN11	ENSG00000172716	0.0844756	0.826575	0.181068	0.0451034	0.092189	0.537273	set2
CCL5	CCL5	ENSG00000271503	0.201948	0.392219	0.328863	0.00580814	0.122306	0.611844	set2
CCL3	CCL3	ENSG00000277632	1.38702	9.72164e-11	4.17275	5.475e-63	2.78135	6.97619e-19	set1
CCL4	CCL4	ENSG00000275302	1.90905	0.00164195	4.0222	2.0152e-44	2.10937	1.3398e-05	set1
TBC1D3B	TBC1D3B	ENSG00000274808	0.965389	0.00475573	0.599619	0.0519248	-0.370406	0.618488	set3
CCL4L2	CCL4L2	ENSG00000276070	1.93552	0.0485264	3.0124	4.9915e-06	1.07241	0.567844	set3
TBC1D3I	TBC1D3I	ENSG00000274933	0.727808	0.000343914	0.591958	0.00229132	-0.140505	0.816218	set3
	AC233699.1	ENSG00000261499	0.577869	0.00503955	0.451569	0.00823607	-0.130801	0.798071	set3
TBC1D3G	TBC1D3G	ENSG00000260287	0.577141	0.252089	0.691517	0.0331749	0.109766	0.922857	set2
GGNBP2	GGNBP2	ENSG00000278311	0.101193	0.687403	0.240889	0.000721859	0.135151	0.207717	set2
DUSP14	DUSP14	ENSG00000276023	0.301437	0.453889	0.447159	0.0274322	0.141253	0.782005	set2
TBC1D3K	TBC1D3K	ENSG00000273513	0.708546	0.00184875	0.925882	7.02076e-07	0.21256	0.718091	set3
TBC1D3L	TBC1D3L	ENSG00000274512	0.462233	0.152411	0.443719	0.0405257	-0.0232566	0.979198	set2
	AC233968.1	ENSG00000274615	0.447517	0.0212489	0.451122	0.00962263	-0.00131232	0.998683	set3
TBC1D3E	TBC1D3E	ENSG00000278599	0.543776	0.020011	0.531595	0.0024733	-0.0168282	0.984026	set3
TBC1D3	TBC1D3	ENSG00000274611	0.610201	0.054734	0.549106	0.0284246	-0.0658078	0.945247	set2
	AC244154.1	ENSG00000274487	0.496723	2.60033e-06	0.349979	0.00132075	-0.151495	0.440961	set3
ARHGAP23	ARHGAP23	ENSG00000275832	0.723677	0.00802354	0.590276	0.00606426	-0.138095	0.856919	set3
CWC25	CWC25	ENSG00000273559	0.0706227	0.915368	0.241583	0.0346334	0.166439	0.306934	set2
THRA	THRA	ENSG00000126351	0.358439	0.020011	0.405049	0.000148594	0.0417	0.918798	set3
RARA	RARA	ENSG00000131759	0.192004	0.272911	0.841477	3.05904e-30	0.644652	7.15982e-18	set1
EIF1	EIF1	ENSG00000173812	0.0329904	0.954012	0.2096	0.00333866	0.171929	0.0371212	set1
DNAJC7	DNAJC7	ENSG00000168259	0.0504499	0.924298	0.189341	0.0187983	0.134365	0.194587	set2
DHX58	DHX58	ENSG00000108771	-0.271542	0.625757	-0.617354	0.000566599	-0.350213	0.166704	set2
KAT2A	KAT2A	ENSG00000108773	-0.179236	0.675499	-0.311568	0.0177316	-0.137831	0.587569	set2
STAT5B	STAT5B	ENSG00000173757	-0.114707	0.702459	-0.199643	0.0237005	-0.0898976	0.634586	set2
	AC099811.1	ENSG00000236194	0.419245	0.270337	0.532638	0.0186147	0.108769	0.884883	set2
PLEKHH3	PLEKHH3	ENSG00000068137	0.347197	0.744834	0.88746	0.0175439	0.535606	0.39876	set2
NBR1	NBR1	ENSG00000188554	-0.266015	0.0809958	-0.2633	0.0114449	-0.00169661	0.99685	set2
	U2	ENSG00000278048	-0.0255158	0.984555	0.415814	0.0220563	0.437172	0.00368672	set1
DUSP3	DUSP3	ENSG00000108861	0.270244	0.228767	0.398979	0.00286688	0.124118	0.707714	set2
	AC103703.1	ENSG00000283045	0.271847	0.88124	0.844673	0.0395625	0.567964	0.463313	set2
KIF18B	KIF18B	ENSG00000186185	-0.166962	0.659779	-0.234002	0.0496059	-0.0719672	0.837016	set2
DCAKD	DCAKD	ENSG00000172992	-0.339302	0.286936	-0.364006	0.0389062	-0.0306596	0.951559	set2
HEXIM2	HEXIM2	ENSG00000168517	-0.551563	0.589825	-0.935538	0.0287698	-0.387648	0.635238	set2
MAP3K14	MAP3K14	ENSG00000006062	0.247539	0.430719	0.546003	0.00011891	0.293807	0.212565	set2
	AC068152.1	ENSG00000262879	-0.191538	0.612872	-0.513222	5.23493e-05	-0.326487	0.0371212	set1
EFCAB13	EFCAB13	ENSG00000178852	-0.355621	0.374082	-0.573931	0.00395618	-0.222819	0.596514	set2
	AC025682.1	ENSG00000263766	-0.518261	0.546824	-0.771308	0.0438684	-0.257863	0.742542	set2
	AC018521.5	ENSG00000264920	-0.119474	0.954012	-0.578081	0.03145	-0.463448	0.341202	set2
UBE2Z	UBE2Z	ENSG00000159202	0.163367	0.300616	0.385179	2.35248e-07	0.217198	0.0172076	set1
IGF2BP1	IGF2BP1	ENSG00000159217	0.132545	0.591627	0.235616	0.000289017	0.0982626	0.595864	set2
NGFR	NGFR	ENSG00000064300	-1.17793	0.005503	-0.985624	0.0105661	0.186888	0.837089	set3
	AC015909.5	ENSG00000279792	0.237935	0.713816	0.600619	0.00580771	0.358011	0.359745	set2
TOB1	TOB1	ENSG00000141232	0.127071	0.716469	0.289106	0.00486791	0.157225	0.378202	set2
SPAG9	SPAG9	ENSG00000008294	0.312266	0.00087994	0.328548	4.83881e-07	0.0118046	0.962843	set3
NME2	NME2	ENSG00000243678	0.145866	0.923355	0.686788	0.0168102	0.536078	0.162797	set2
	AC007485.2	ENSG00000279059	-0.503719	0.123209	-0.570284	0.011775	-0.071139	0.916844	set2
TRIM25	TRIM25	ENSG00000121060	-0.177286	0.313477	-0.202851	0.00571457	-0.0304344	0.910566	set2
	AC004584.3	ENSG00000263120	0.162254	0.944508	-0.696374	0.0310307	-0.862969	0.0260731	set1
MKS1	MKS1	ENSG00000011143	-0.236505	0.432485	-0.451127	0.00054949	-0.219346	0.30664	set2
	AC004687.1	ENSG00000265206	0.249425	0.184165	0.415876	4.97034e-06	0.161888	0.477368	set2
MTMR4	MTMR4	ENSG00000108389	-0.260452	0.0302726	-0.313417	2.08874e-05	-0.0578598	0.774621	set3
YPEL2	YPEL2	ENSG00000175155	0.367378	0.0224099	0.434736	0.000280582	0.0628306	0.862725	set3
VMP1	VMP1	ENSG00000062716	0.14674	0.571124	0.400816	3.06295e-09	0.249617	0.0297554	set1
INTS2	INTS2	ENSG00000108506	-0.0696413	0.907587	-0.236888	0.0246549	-0.171722	0.120665	set2
	AC018628.1	ENSG00000279133	0.321033	0.130449	0.282851	0.0473718	-0.042501	0.925208	set2
DCAF7	DCAF7	ENSG00000136485	-0.22158	0.200557	-0.265745	0.000321161	-0.0489774	0.861327	set2
MAP3K3	MAP3K3	ENSG00000198909	-0.203858	0.182999	-0.246697	0.00425392	-0.047606	0.796591	set2
	AC046185.3	ENSG00000279369	-0.168654	0.836024	-0.397566	0.0471821	-0.233947	0.497842	set2
GNA13	GNA13	ENSG00000120063	0.129756	0.528329	0.208979	0.00963541	0.0747131	0.641232	set2
KPNA2	KPNA2	ENSG00000182481	-0.259414	0.0669617	-0.208018	0.0349895	0.0468084	0.780054	set2
CD300A	CD300A	ENSG00000167851	-0.19266	0.32722	-0.295815	0.00229132	-0.108052	0.507534	set2
CD300LB	CD300LB	ENSG00000178789	-0.167444	0.506216	-0.291612	0.000771824	-0.129032	0.362807	set2
CD300C	CD300C	ENSG00000167850	-0.151793	0.663823	-0.302481	0.00694932	-0.155812	0.243249	set2
RAB37	RAB37	ENSG00000172794	-0.209885	0.377036	-0.362696	0.00036991	-0.157758	0.421921	set2
CD300LF	CD300LF	ENSG00000186074	-0.137955	0.473526	-0.381254	3.54202e-08	-0.248041	0.00121971	set1
SLC9A3R1	SLC9A3R1	ENSG00000109062	-0.182789	0.504256	-0.291536	0.000258854	-0.113743	0.615609	set2
NT5C	NT5C	ENSG00000125458	0.126268	0.805773	0.287957	0.0285699	0.156857	0.571104	set2
JPT1	JPT1	ENSG00000189159	-0.274925	0.0124759	-0.212021	0.00640557	0.0581086	0.781318	set3
RECQL5	RECQL5	ENSG00000108469	-0.182275	0.549901	-0.389083	0.000969038	-0.211682	0.127341	set2
UNC13D	UNC13D	ENSG00000092929	-0.144899	0.713968	-0.266746	0.0284246	-0.127013	0.364431	set2
QRICH2	QRICH2	ENSG00000129646	-0.253623	0.589825	-0.557752	0.00191168	-0.308773	0.256529	set2
RHBDF2	RHBDF2	ENSG00000129667	-0.00199501	0.999217	-0.40603	0.0436666	-0.409857	0.0552154	set2
JMJD6	JMJD6	ENSG00000070495	0.023556	0.978339	0.500839	8.67839e-09	0.472688	7.6499e-09	set1
METTL23	METTL23	ENSG00000181038	-0.295158	0.187809	-0.301317	0.0383948	-0.0107785	0.985437	set2
SRSF2	SRSF2	ENSG00000161547	0.0399926	0.94522	0.218336	0.00401445	0.173666	0.0240328	set1
TNRC6C-AS1	TNRC6C-AS1	ENSG00000204282	-0.196026	0.546824	-0.488821	3.1592e-05	-0.297855	0.0404106	set1
SOCS3	SOCS3	ENSG00000184557	-0.0459631	0.984958	1.52702	8.22105e-08	1.56645	3.58019e-42	set1
DNAH17	DNAH17	ENSG00000187775	-0.364758	0.451998	-0.501929	0.0379809	-0.142066	0.811194	set2
CYTH1	CYTH1	ENSG00000108669	0.169208	0.239331	0.35901	1.87813e-07	0.185145	0.0318619	set1
	AC099804.1	ENSG00000279570	0.117468	0.952186	0.781233	0.0127146	0.659249	0.0853928	set2
RNU6-638P	RNU6-638P	ENSG00000252391	0.317687	0.816665	0.701373	0.0360245	0.378126	0.679065	set2
USP36	USP36	ENSG00000055483	0.0713147	0.887687	0.193497	0.0488262	0.117276	0.421921	set2
CEP295NL	CEP295NL	ENSG00000178404	0.317543	0.40144	0.434178	0.0350511	0.111996	0.83715	set2
CBX8	CBX8	ENSG00000141570	-0.122283	0.808552	-0.260777	0.0454549	-0.143622	0.503556	set2
CBX4	CBX4	ENSG00000141582	0.0681368	0.900007	0.357155	8.77137e-06	0.284176	0.00210146	set1
BAIAP2	BAIAP2	ENSG00000175866	0.573867	0.00745062	0.495909	0.00688632	-0.0825491	0.894901	set3
SIRT7	SIRT7	ENSG00000187531	0.0886769	0.808198	0.209859	0.0197412	0.116382	0.384583	set2
MAFG	MAFG	ENSG00000197063	0.260326	0.0279326	0.479979	3.53487e-11	0.214823	0.0210502	set1
SLC16A3	SLC16A3	ENSG00000141526	0.331557	0.0181304	0.357083	0.000180963	0.0206468	0.947056	set3
	AC132872.3	ENSG00000275888	0.737448	0.0851862	1.20093	8.57589e-05	0.459098	0.514348	set2
	AC132872.4	ENSG00000280407	0.579539	0.20698	0.920825	0.00227072	0.337157	0.666715	set2
WDR45B	WDR45B	ENSG00000141580	0.214247	0.13889	0.379863	3.17455e-06	0.160956	0.194995	set2
	AC087222.1	ENSG00000262663	0.589657	0.470072	0.933154	0.0322047	0.339573	0.780054	set2
METRNL	METRNL	ENSG00000176845	0.403219	0.127953	0.656294	6.60356e-05	0.248062	0.341202	set2
LPIN2	LPIN2	ENSG00000101577	0.128372	0.652201	0.482407	2.32618e-12	0.349658	0.000106558	set1
	AP000919.1	ENSG00000263606	-0.114178	0.945533	1.03632	2.47495e-05	1.14602	6.78948e-06	set1
TGIF1	TGIF1	ENSG00000177426	-0.0695261	0.941834	0.397954	0.00415417	0.463003	0.00128688	set1
EPB41L3	EPB41L3	ENSG00000082397	0.237707	0.0951421	0.704014	6.02799e-13	0.461532	5.52703e-06	set1
ANKRD12	ANKRD12	ENSG00000101745	0.291118	0.0185885	0.340738	1.33558e-05	0.0451915	0.838736	set3
PPP4R1	PPP4R1	ENSG00000154845	0.109035	0.659779	0.166155	0.0484779	0.0526346	0.788161	set2
NAPG	NAPG	ENSG00000134265	0.0806851	0.852112	0.241083	0.0046352	0.155796	0.223794	set2
SEH1L	SEH1L	ENSG00000085415	0.136889	0.545204	0.194837	0.0418438	0.0534988	0.820361	set2
CABLES1	CABLES1	ENSG00000134508	-0.389786	0.0523019	-0.416017	0.000313248	-0.0315256	0.940137	set2
C18orf8	C18orf8	ENSG00000141452	0.151813	0.616888	0.33539	0.000680636	0.178971	0.302132	set2
TTC39C	TTC39C	ENSG00000168234	0.333132	0.00164195	0.513548	7.85812e-13	0.175934	0.117363	set3
KCTD1	KCTD1	ENSG00000134504	-0.63056	0.527595	-0.903117	0.0211942	-0.277068	0.786625	set2
RNF125	RNF125	ENSG00000101695	0.10747	0.797804	0.342529	0.000643547	0.230408	0.0921823	set2
ZNF397	ZNF397	ENSG00000186812	-0.383136	0.00503955	-0.665166	6.52599e-13	-0.286617	0.00826618	set1
ZSCAN30	ZSCAN30	ENSG00000186814	-0.216838	0.326481	-0.28552	0.0113268	-0.0731782	0.79875	set2
C18orf25	C18orf25	ENSG00000152242	0.0882529	0.793372	0.249028	0.00358383	0.156075	0.202037	set2
ZBTB7C	ZBTB7C	ENSG00000184828	-0.299374	0.464263	-0.552272	0.00216144	-0.257925	0.397837	set2
POLI	POLI	ENSG00000101751	-0.160104	0.626627	-0.344882	0.00638036	-0.189414	0.361771	set2
C18orf54	C18orf54	ENSG00000166845	-0.17282	0.839683	-0.451052	0.0255593	-0.282844	0.371889	set2
PMAIP1	PMAIP1	ENSG00000141682	-0.00142754	0.998869	0.707359	1.57508e-17	0.704192	3.27241e-14	set1
PHLPP1	PHLPP1	ENSG00000081913	0.453183	2.81544e-05	0.611482	8.31739e-13	0.153477	0.349882	set3
CD226	CD226	ENSG00000150637	-0.428342	0.367992	-0.816925	0.000287667	-0.393711	0.252649	set2
MBP	MBP	ENSG00000197971	0.0134808	0.984555	0.189756	0.0239721	0.171688	0.116078	set2
	AC018529.3	ENSG00000279433	-0.0921483	0.945829	0.497953	0.0361311	0.585239	0.0256483	set1
NFATC1	NFATC1	ENSG00000131196	0.268286	0.101182	0.471926	2.16739e-08	0.198684	0.153946	set2
	AC018445.3	ENSG00000279637	0.953817	1.91673e-07	0.943924	2.98258e-08	-0.014525	0.988305	set3
ADNP2	ADNP2	ENSG00000101544	0.0333397	0.961739	0.230269	0.00705738	0.192263	0.0610663	set2
TPGS1	TPGS1	ENSG00000141933	0.0968683	0.919466	0.371025	0.0392181	0.269527	0.337739	set2
RNF126	RNF126	ENSG00000070423	0.170359	0.460921	0.532216	2.13053e-11	0.357137	0.000795125	set1
MIDN	MIDN	ENSG00000167470	0.153337	0.691756	0.524514	3.8484e-07	0.366112	8.7319e-06	set1
MUM1	MUM1	ENSG00000160953	-0.242539	0.443625	-0.334383	0.0155162	-0.0974086	0.756473	set2
ATP8B3	ATP8B3	ENSG00000130270	-0.245681	0.390815	-0.326458	0.0245074	-0.0855772	0.828653	set2
KLF16	KLF16	ENSG00000129911	0.202843	0.528057	0.474303	4.63238e-05	0.266349	0.106204	set2
	AC012615.1	ENSG00000261526	-0.157702	0.823357	0.417023	0.0477692	0.570214	0.00400772	set1
ABHD17A	ABHD17A	ENSG00000129968	0.165922	0.519308	0.494695	3.26334e-08	0.323985	0.000250339	set1
DOT1L	DOT1L	ENSG00000104885	0.211064	0.300616	0.278031	0.00478043	0.0619173	0.797759	set2
PEAK3	PEAK3	ENSG00000188305	-0.871382	0.0469793	-1.0007	0.00105356	-0.135835	0.850661	set3
GADD45B	GADD45B	ENSG00000099860	0.217886	0.759822	0.480061	0.00794688	0.257695	0.564532	set2
MATK	MATK	ENSG00000007264	0.280071	0.270337	0.371537	0.00722546	0.0862608	0.771949	set2
ZBTB7A	ZBTB7A	ENSG00000178951	0.18497	0.531076	0.310975	0.00257076	0.120931	0.57959	set2
	AC016586.1	ENSG00000268670	0.125395	0.920428	0.51584	0.0361392	0.385589	0.348474	set2
SH3GL1	SH3GL1	ENSG00000141985	0.175063	0.541729	0.299791	0.0061076	0.119735	0.62204	set2
LRG1	LRG1	ENSG00000171236	-0.179705	0.302302	-0.255905	0.000730955	-0.0808719	0.709449	set2
SEMA6B	SEMA6B	ENSG00000167680	0.158784	0.6393	0.242736	0.0194032	0.0790252	0.786581	set2
TNFAIP8L1	TNFAIP8L1	ENSG00000185361	0.378747	0.00545638	0.641085	1.00274e-10	0.257539	0.0779222	set3
TICAM1	TICAM1	ENSG00000127666	0.385706	0.313023	0.947422	9.31272e-06	0.557533	0.0893458	set2
DUS3L	DUS3L	ENSG00000141994	0.0793558	0.922892	0.271682	0.0499294	0.18734	0.358414	set2
RFX2	RFX2	ENSG00000087903	0.388546	0.0666908	0.708829	4.54876e-08	0.315851	0.137175	set2
TNFSF9	TNFSF9	ENSG00000125657	0.313038	0.0666908	0.58379	1.33898e-08	0.265839	0.0872176	set2
	AC119396.1	ENSG00000263264	-0.150692	0.81693	-0.351448	0.0333509	-0.20569	0.418926	set2
PNPLA6	PNPLA6	ENSG00000032444	-0.222631	0.40144	-0.354975	0.00291624	-0.137443	0.596514	set2
SNAPC2	SNAPC2	ENSG00000104976	0.277613	0.396786	0.409217	0.0195724	0.127046	0.786581	set2
PRAM1	PRAM1	ENSG00000133246	-0.103884	0.829245	-0.252443	0.0129199	-0.153532	0.192926	set2
ZNF558	ZNF558	ENSG00000167785	-0.306194	0.337956	-0.375192	0.0196067	-0.0734472	0.885473	set2
ZNF561-AS1	ZNF561-AS1	ENSG00000267106	-0.349867	0.77464	-0.892729	0.00801365	-0.547087	0.269989	set2
PPAN	PPAN	ENSG00000130810	0.255149	0.599073	0.580527	0.00373037	0.320731	0.306996	set2
P2RY11	P2RY11	ENSG00000244165	0.484817	0.064148	0.922644	6.81249e-07	0.433311	0.167506	set2
ICAM1	ICAM1	ENSG00000090339	0.561038	6.92964e-08	0.548131	5.24339e-14	-0.017861	0.957622	set3
ATG4D	ATG4D	ENSG00000130734	0.0756766	0.927009	0.417204	0.00125394	0.336759	0.0369663	set1
KRI1	KRI1	ENSG00000129347	0.196775	0.313477	0.20981	0.035803	0.00831946	0.985721	set2
CDKN2D	CDKN2D	ENSG00000129355	0.403378	0.0257645	0.761376	9.23526e-09	0.353368	0.0835821	set3
RAB3D	RAB3D	ENSG00000105514	-0.389308	0.062337	-0.45176	0.000224324	-0.0676632	0.840456	set2
EPOR	EPOR	ENSG00000187266	-0.808669	0.0252924	-0.604676	0.0509485	0.199286	0.745613	set3
	AC008770.1	ENSG00000219665	0.251627	0.19643	0.253524	0.0385848	-0.00307378	0.996085	set2
JUNB	JUNB	ENSG00000171223	0.397429	0.00432513	1.80502	3.21593e-80	1.40274	6.65714e-102	set1
GADD45GIP1	GADD45GIP1	ENSG00000179271	0.0288974	0.980834	0.317483	0.0194032	0.283763	0.151109	set2
IER2	IER2	ENSG00000160888	0.396959	0.000218247	1.47894	6.21858e-78	1.07738	3.12355e-59	set1
	AC020916.1	ENSG00000267519	-0.185206	0.939639	2.91207	5.68179e-15	3.08915	5.1719e-61	set1
ADGRE5	ADGRE5	ENSG00000123146	0.147106	0.447398	0.310136	1.45734e-05	0.158265	0.127341	set2
TECR	TECR	ENSG00000099797	-0.122006	0.809146	-0.185654	0.0498505	-0.0685906	0.840274	set2
ADGRE3	ADGRE3	ENSG00000131355	-0.281482	0.0434514	-0.430525	2.22934e-06	-0.153567	0.350324	set3
ZNF333	ZNF333	ENSG00000160961	-0.264286	0.259529	-0.505805	2.76983e-06	-0.24607	0.170825	set2
ADGRE2	ADGRE2	ENSG00000127507	0.427426	1.43394e-06	0.367964	3.38754e-07	-0.0641623	0.77956	set3
AKAP8	AKAP8	ENSG00000105127	0.0892887	0.837325	0.268478	0.00252712	0.174515	0.259635	set2
AKAP8L	AKAP8L	ENSG00000011243	0.164756	0.512582	0.277156	0.0105328	0.107418	0.596514	set2
WIZ	WIZ	ENSG00000011451	0.181398	0.546824	0.323406	0.00181968	0.136943	0.572139	set2
CYP4F3	CYP4F3	ENSG00000186529	-0.188219	0.377036	-0.373696	7.82612e-05	-0.190088	0.0263091	set1
TPM4	TPM4	ENSG00000167460	0.217429	0.0925368	0.444214	2.05703e-10	0.222245	0.0318113	set1
	AC008894.2	ENSG00000269243	-0.503845	0.571532	-0.746978	0.0322291	-0.248405	0.776613	set2
HSH2D	HSH2D	ENSG00000196684	-0.0628981	0.891678	-0.173604	0.0394114	-0.115525	0.359617	set2
KLF2	KLF2	ENSG00000127528	-0.1554	0.935358	1.84898	2.67279e-07	2.00049	3.44985e-09	set1
C19orf44	C19orf44	ENSG00000105072	-0.408227	0.600248	-0.721947	0.0181981	-0.318745	0.609278	set2
SIN3B	SIN3B	ENSG00000127511	-0.0628861	0.922892	-0.241192	0.0147569	-0.183243	0.0189569	set1
	AC008737.1	ENSG00000268743	0.124288	0.952186	-0.586044	0.0470436	-0.715902	0.00947925	set1
BST2	BST2	ENSG00000130303	-0.210623	0.312315	-0.274911	0.012321	-0.0686856	0.795522	set2
BISPR	BISPR	ENSG00000282851	-0.468724	0.228784	-0.614993	0.00504708	-0.150501	0.773496	set2
ARRDC2	ARRDC2	ENSG00000105643	0.233721	0.168439	0.229388	0.0413525	-0.00895901	0.985437	set2
IFI30	IFI30	ENSG00000216490	0.665218	0.308948	1.1986	0.00219438	0.528178	0.598129	set2
JUND	JUND	ENSG00000130522	0.236999	0.264221	1.05196	4.58642e-28	0.81042	6.66479e-22	set1
ZNF431	ZNF431	ENSG00000196705	-0.0758834	0.869023	-0.258149	0.00206	-0.186777	0.0684517	set2
ZNF429	ZNF429	ENSG00000197013	-0.0979965	0.962804	-0.785905	0.00178018	-0.691955	0.00783412	set1
UQCRFS1	UQCRFS1	ENSG00000169021	-0.0267513	0.972466	0.197642	0.049343	0.219768	0.0675725	set2
CEBPA	CEBPA	ENSG00000245848	-0.0712692	0.942187	-0.243619	0.0435616	-0.177241	0.380509	set2
UBA2	UBA2	ENSG00000126261	0.112251	0.631491	0.249556	0.000963682	0.132825	0.181325	set2
ZNF302	ZNF302	ENSG00000089335	-0.172457	0.763655	-0.347505	0.0306797	-0.180102	0.537105	set2
KMT2B	KMT2B	ENSG00000272333	0.263377	0.126373	0.360096	0.000268679	0.0915929	0.62205	set2
NFKBID	NFKBID	ENSG00000167604	1.21985	2.21155e-07	2.1388	1.96968e-95	0.915081	3.3435e-15	set1
ZNF850	ZNF850	ENSG00000267041	-0.0796114	0.887278	0.231576	0.0385848	0.306603	0.00643516	set1
ZNF790	ZNF790	ENSG00000197863	-0.0323904	0.981555	-0.389731	0.0223412	-0.361885	0.0746982	set2
ZNF585A	ZNF585A	ENSG00000196967	-0.071864	0.941518	-0.329252	0.0181865	-0.26218	0.175791	set2
ZNF585B	ZNF585B	ENSG00000245680	-0.221538	0.342439	-0.396001	0.000451976	-0.17923	0.344546	set2
LINC01535	LINC01535	ENSG00000226686	-0.661993	0.396786	-0.874958	0.0313701	-0.218223	0.823559	set2
RASGRP4	RASGRP4	ENSG00000171777	0.539252	0.0172217	0.359788	0.0558307	-0.184037	0.644188	set3
	AC008982.2	ENSG00000269688	-0.0219647	0.985662	0.473231	0.0254382	0.490586	0.0543549	set2
RINL	RINL	ENSG00000187994	-0.314226	0.182409	-0.351117	0.0174448	-0.0419091	0.922199	set2
ZFP36	ZFP36	ENSG00000128016	0.367311	0.0469793	1.65571	1.33558e-50	1.28359	2.2223e-45	set1
ZNF546	ZNF546	ENSG00000187187	-0.253425	0.585792	-0.77503	2.05154e-06	-0.526203	0.00405764	set1
ZNF780B	ZNF780B	ENSG00000128000	-0.0807713	0.874883	-0.311686	0.000269235	-0.235423	0.0316294	set1
ZNF780A	ZNF780A	ENSG00000197782	-0.113122	0.728657	-0.355381	7.03107e-06	-0.246771	0.0230871	set1
SERTAD1	SERTAD1	ENSG00000197019	0.0591468	0.97826	0.777013	0.00959955	0.713092	0.027729	set1
SERTAD3	SERTAD3	ENSG00000167565	0.16901	0.6393	0.83208	2.00989e-15	0.658438	2.00153e-08	set1
COQ8B	COQ8B	ENSG00000123815	-0.0402306	0.968868	-0.357911	0.0048078	-0.322349	0.0287828	set1
C19orf54	C19orf54	ENSG00000188493	-0.312015	0.372168	-0.402531	0.00863024	-0.0965607	0.814228	set2
EGLN2	EGLN2	ENSG00000269858	0.175925	0.326622	0.352274	3.13101e-05	0.171742	0.209723	set2
B3GNT8	B3GNT8	ENSG00000177191	-0.139741	0.882876	-0.48018	0.00258477	-0.346563	0.0458189	set1
	AC243960.1	ENSG00000268027	0.0814618	0.963655	-0.621635	0.00205313	-0.706544	0.000189406	set1
CEACAM4	CEACAM4	ENSG00000105352	-0.0309786	0.9838	-0.334455	0.0463803	-0.30821	0.193553	set2
ERF	ERF	ENSG00000105722	0.220595	0.261964	0.592259	2.11427e-11	0.367047	0.000172976	set1
CIC	CIC	ENSG00000079432	0.0828508	0.902073	0.241317	0.0245074	0.153343	0.361649	set2
LIPE-AS1	LIPE-AS1	ENSG00000213904	-0.270556	0.50844	-0.481724	0.00596346	-0.216058	0.508815	set2
CEACAM1	CEACAM1	ENSG00000079385	-0.436509	0.00191134	-0.736293	1.15372e-13	-0.304306	0.000812432	set1
PLAUR	PLAUR	ENSG00000011422	0.189934	0.514622	0.57045	5.74643e-10	0.376253	0.00530232	set1
ZNF226	ZNF226	ENSG00000167380	-0.148849	0.584728	-0.269089	0.00879789	-0.124843	0.437505	set2
PVR	PVR	ENSG00000073008	0.188541	0.584944	0.373097	0.00287735	0.179369	0.395869	set2
BCL3	BCL3	ENSG00000069399	2.08741	9.13677e-31	2.59423	6.2579e-50	0.500438	0.329443	set3
RELB	RELB	ENSG00000104856	0.876784	1.29826e-08	1.56057	5.20252e-28	0.679348	0.000763459	set1
ZNF296	ZNF296	ENSG00000170684	0.120472	0.923298	0.404097	0.0466184	0.278755	0.50395	set2
FOSB	FOSB	ENSG00000125740	0.0487833	0.984372	3.31709	2.59078e-37	3.26373	4.4838e-32	set1
GIPR	GIPR	ENSG00000010310	0.33641	0.363316	0.424827	0.0432022	0.0837629	0.898841	set2
CCDC61	CCDC61	ENSG00000104983	-0.400231	0.166086	-0.389373	0.0421939	0.00624722	0.993915	set2
TMEM160	TMEM160	ENSG00000130748	-0.0801399	0.984555	0.81861	0.00125981	0.892184	0.233809	set2
ZC3H4	ZC3H4	ENSG00000130749	-0.299546	0.135012	-0.333434	0.000128317	-0.03909	0.917703	set2
CCDC9	CCDC9	ENSG00000105321	0.154681	0.685914	0.266232	0.0388135	0.106757	0.735198	set2
CARD8	CARD8	ENSG00000105483	-0.160612	0.244991	-0.336748	2.86385e-08	-0.180703	0.0210502	set1
EMP3	EMP3	ENSG00000142227	0.528988	0.00717834	0.540652	0.000375685	0.00758915	0.991075	set3
CYTH2	CYTH2	ENSG00000105443	0.0730104	0.852112	0.233042	0.00172241	0.155438	0.152463	set2
PPP1R15A	PPP1R15A	ENSG00000087074	0.166878	0.464263	1.74374	5.91512e-79	1.57219	1.06656e-64	set1
PRMT1	PRMT1	ENSG00000126457	0.0112878	0.985662	0.192061	0.0354766	0.176026	0.127341	set2
ADM5	ADM5	ENSG00000224420	0.196055	0.940006	1.04474	0.0176702	0.84409	0.210314	set2
SIGLEC11	SIGLEC11	ENSG00000161640	-0.306892	0.429188	-0.62424	0.000311905	-0.322378	0.142158	set2
SIGLEC16	SIGLEC16	ENSG00000161643	0.051283	0.953802	-0.501718	2.8804e-06	-0.55783	1.12684e-09	set1
SIGLEC9	SIGLEC9	ENSG00000129450	-0.516164	0.622843	-1.03876	0.00446164	-0.529454	0.222273	set2
SIGLEC7	SIGLEC7	ENSG00000168995	-0.354778	0.069401	-0.86881	2.33718e-14	-0.518603	5.80021e-06	set1
SIGLEC17P	SIGLEC17P	ENSG00000171101	-0.0972967	0.873053	-0.341011	0.00236381	-0.248091	0.106459	set2
CD33	CD33	ENSG00000105383	-0.141819	0.429188	-0.398492	2.94252e-09	-0.261362	0.000461721	set1
SIGLEC12	SIGLEC12	ENSG00000254521	-0.169305	0.543981	-0.454948	1.10283e-05	-0.290324	0.0245403	set1
ZNF175	ZNF175	ENSG00000105497	-0.0396449	0.963655	-0.246342	0.0285423	-0.211313	0.143612	set2
SIGLEC14	SIGLEC14	ENSG00000254415	-0.202526	0.519578	-0.293668	0.0106554	-0.0964682	0.735925	set2
SPACA6	SPACA6	ENSG00000182310	0.44866	0.0737184	0.507807	0.00109281	0.0542246	0.936256	set2
FPR2	FPR2	ENSG00000171049	-0.340464	0.0495076	-0.2697	0.0234841	0.0662583	0.84419	set3
ZNF577	ZNF577	ENSG00000161551	-0.158094	0.72879	-0.289723	0.0383948	-0.136111	0.646793	set2
MYADM	MYADM	ENSG00000179820	0.254167	0.0757009	0.570599	1.92843e-19	0.311705	0.00074356	set1
LILRB2	LILRB2	ENSG00000131042	-0.250119	0.278085	-0.48074	5.49945e-06	-0.235657	0.0111231	set1
LILRA5	LILRA5	ENSG00000187116	-0.310083	0.0463384	-0.34991	0.000921651	-0.0443386	0.900845	set3
	AC245884.11	ENSG00000275210	0.43679	0.233775	-0.536321	0.00355436	-0.977458	4.22597e-08	set1
LAIR1	LAIR1	ENSG00000167613	-0.125842	0.53377	-0.185901	0.0284985	-0.0647608	0.718103	set2
LENG8-AS1	LENG8-AS1	ENSG00000226696	-0.222687	0.71969	-0.527204	0.00265656	-0.309361	0.252251	set2
LENG8	LENG8	ENSG00000167615	0.227702	0.183505	0.300422	0.00502289	0.0679255	0.756367	set2
LILRA1	LILRA1	ENSG00000104974	-0.301567	0.0212504	-0.450868	9.27297e-09	-0.154318	0.244161	set3
LILRB1	LILRB1	ENSG00000104972	-0.272422	0.725724	-0.638483	0.00673822	-0.370887	0.278886	set2
FCAR	FCAR	ENSG00000186431	0.432562	0.109509	1.17026	5.81644e-16	0.733659	2.80005e-05	set1
	AC245128.3	ENSG00000268734	0.696168	0.00695458	1.20393	8.30934e-10	0.502801	0.175034	set3
ZNF543	ZNF543	ENSG00000178229	-0.0888223	0.939601	-0.354679	0.0422476	-0.270464	0.241797	set2
ZNF671	ZNF671	ENSG00000083814	-0.0780047	0.95258	-0.625857	0.000151336	-0.552387	0.00110591	set1
ZNF606	ZNF606	ENSG00000166704	-0.112864	0.916379	-0.446428	0.0113736	-0.33832	0.148678	set2
ERVK3-1	ERVK3-1	ENSG00000142396	0.0317557	0.963655	0.304368	0.000697487	0.268028	0.00816503	set1
	AC012313.1	ENSG00000232098	-0.210522	0.876833	-0.58258	0.0363333	-0.376375	0.367547	set2
ZNF324	ZNF324	ENSG00000083812	0.126872	0.827097	0.41903	0.00343187	0.287461	0.194045	set2
TRIB3	TRIB3	ENSG00000101255	0.356899	0.365498	0.730197	0.000368387	0.368693	0.302291	set2
SIRPB2	SIRPB2	ENSG00000196209	-0.609992	0.249588	-0.839907	0.00756063	-0.234154	0.719373	set2
SIRPD	SIRPD	ENSG00000125900	-0.0728871	0.945829	-0.407356	0.00695957	-0.33891	0.0458189	set1
SIRPB1	SIRPB1	ENSG00000101307	-0.186102	0.299154	-0.309547	0.000521586	-0.128186	0.312514	set2
ZNF343	ZNF343	ENSG00000088876	-0.18401	0.849146	-0.479354	0.0304454	-0.29948	0.311047	set2
PCED1A	PCED1A	ENSG00000132635	-0.307606	0.182409	-0.312552	0.0451888	-0.00969565	0.987579	set2
FASTKD5	FASTKD5	ENSG00000215251	0.0313338	0.970917	0.413744	3.3551e-05	0.377732	0.000325487	set1
SIGLEC1	SIGLEC1	ENSG00000088827	-0.342912	0.601176	-0.617943	0.0157612	-0.279563	0.552398	set2
CDC25B	CDC25B	ENSG00000101224	-0.346363	0.0315682	-0.283689	0.00434593	0.0576361	0.857932	set3
MAVS	MAVS	ENSG00000088888	-0.185246	0.357505	-0.262572	0.00189606	-0.0822513	0.653647	set2
PANK2	PANK2	ENSG00000125779	0.078889	0.852112	0.197732	0.0171719	0.114382	0.489088	set2
SMOX	SMOX	ENSG00000088826	0.260556	0.212896	0.477835	4.64353e-06	0.212251	0.0797673	set2
PRNP	PRNP	ENSG00000171867	0.0947281	0.89178	0.288594	0.0466915	0.189212	0.396661	set2
RASSF2	RASSF2	ENSG00000101265	0.244697	0.00902764	0.387316	3.03312e-11	0.138007	0.0983898	set3
TRMT6	TRMT6	ENSG00000089195	0.0571229	0.941392	0.259709	0.0175683	0.197993	0.123845	set2
SLX4IP	SLX4IP	ENSG00000149346	-0.227799	0.445919	-0.505041	1.25976e-05	-0.281292	0.0824972	set2
JAG1	JAG1	ENSG00000101384	0.165611	0.791254	0.58152	0.000530496	0.411164	0.0662605	set2
BTBD3	BTBD3	ENSG00000132640	0.443208	0.00357343	0.529911	9.82463e-06	0.0822044	0.831457	set3
SNORD17	SNORD17	ENSG00000212232	-0.269496	0.615317	-0.646548	1.15022e-05	-0.381977	0.570593	set2
MGME1	MGME1	ENSG00000125871	-0.0551815	0.941834	-0.21293	0.0407471	-0.162077	0.283399	set2
KAT14	KAT14	ENSG00000149474	-0.319858	0.214606	-0.385599	0.00963541	-0.070703	0.870362	set2
	AL390037.1	ENSG00000277901	0.778608	0.147708	1.21682	0.00057659	0.435157	0.669978	set2
	AL096677.1	ENSG00000234832	0.687274	0.0621367	1.15211	2.5345e-05	0.460688	0.443818	set2
NXT1	NXT1	ENSG00000132661	0.157981	0.705338	0.462165	0.000326716	0.299404	0.0402221	set1
GZF1	GZF1	ENSG00000125812	0.125108	0.753093	0.464962	2.79622e-06	0.335506	0.0030864	set1
PLAGL2	PLAGL2	ENSG00000126003	0.134709	0.699725	0.279999	0.000832184	0.140269	0.504853	set2
E2F1	E2F1	ENSG00000101412	0.192321	0.525664	0.463767	1.87817e-05	0.266546	0.14118	set2
PXMP4	PXMP4	ENSG00000101417	-0.298721	0.349573	-0.491029	0.00337371	-0.1971	0.536816	set2
	AL034549.2	ENSG00000276073	-0.45182	0.390815	-0.58126	0.0421134	-0.134062	0.848625	set2
RALY	RALY	ENSG00000125970	0.0444583	0.940548	0.162822	0.0310812	0.113588	0.349245	set2
TP53INP2	TP53INP2	ENSG00000078804	0.00495035	0.995609	0.509964	0.00141838	0.500519	0.000478635	set1
CEP250	CEP250	ENSG00000126001	-0.0989913	0.765631	-0.210784	0.0222154	-0.116686	0.402047	set2
TGIF2	TGIF2	ENSG00000118707	0.175203	0.430286	0.386427	9.52939e-05	0.206614	0.183718	set2
C20orf24	C20orf24	ENSG00000101084	-0.0444447	0.985662	0.654025	0.000157573	0.694126	0.250503	set2
NDRG3	NDRG3	ENSG00000101079	-0.192518	0.40144	-0.270066	0.0142379	-0.0822537	0.759116	set2
SOGA1	SOGA1	ENSG00000149639	-0.176415	0.620406	-0.250482	0.0271408	-0.079465	0.782005	set2
SAMHD1	SAMHD1	ENSG00000101347	-0.160726	0.275093	-0.192542	0.0145036	-0.0364828	0.84419	set2
TGM2	TGM2	ENSG00000198959	-0.312905	0.65271	-0.405782	9.0684e-05	-0.0978103	0.88804	set2
KIAA1755	KIAA1755	ENSG00000149633	-0.108964	0.963655	-0.717442	0.0323881	-0.612835	0.158215	set2
FAM83D	FAM83D	ENSG00000101447	-0.275469	0.222765	-0.387313	0.00184275	-0.116535	0.683682	set2
TOP1	TOP1	ENSG00000198900	-0.216956	0.0914237	-0.277647	5.02596e-05	-0.0654951	0.732794	set2
SYS1	SYS1	ENSG00000204070	0.0462826	0.953698	0.301988	0.00964314	0.251084	0.0900304	set2
UBE2C	UBE2C	ENSG00000175063	-0.280381	0.0485264	-0.19954	0.0430209	0.0762683	0.727699	set3
PLTP	PLTP	ENSG00000100979	-0.125389	0.67274	-0.228887	0.0110143	-0.108493	0.483096	set2
ZNF335	ZNF335	ENSG00000198026	0.189388	0.220216	0.247001	0.00377502	0.052963	0.823848	set2
TP53RK	TP53RK	ENSG00000172315	0.00258401	0.997858	0.272355	0.00903907	0.264969	0.0241769	set1
ZMYND8	ZMYND8	ENSG00000101040	-0.204402	0.0649797	-0.259076	6.17717e-05	-0.0593536	0.705949	set2
	AL031666.3	ENSG00000273451	-0.149519	0.916216	-0.858023	1.37204e-05	-0.713563	0.000913385	set1
SULF2	SULF2	ENSG00000196562	-1.03747	0.11118	-1.02377	0.0367852	0.00826068	0.996466	set2
ARFGEF2	ARFGEF2	ENSG00000124198	0.220507	0.0469793	0.297452	1.34063e-05	0.0722994	0.674048	set3
ZNFX1	ZNFX1	ENSG00000124201	0.00362572	0.993768	0.169074	0.0436666	0.160774	0.0841507	set2
B4GALT5	B4GALT5	ENSG00000158470	-0.380682	0.00182174	-0.367662	1.73322e-05	0.00823356	0.978623	set3
UBE2V1	UBE2V1	ENSG00000244687	0.0620831	0.944508	0.283534	0.0491306	0.216823	0.337604	set2
SMIM25	SMIM25	ENSG00000224397	-0.344473	0.0479175	-0.75345	3.90843e-13	-0.4138	7.1599e-05	set1
TMSB4XP6	TMSB4XP6	ENSG00000230043	-0.447956	0.737055	-0.869433	0.0300777	-0.425954	0.583982	set2
NFATC2	NFATC2	ENSG00000101096	0.158061	0.577465	0.230043	0.00759787	0.0669663	0.794546	set2
STX16	STX16	ENSG00000124222	-0.154723	0.399528	-0.242416	0.00205504	-0.0924963	0.561409	set2
SS18L1	SS18L1	ENSG00000184402	0.232411	0.138359	0.218342	0.0274765	-0.0186686	0.955637	set2
ADRM1	ADRM1	ENSG00000130706	0.0292161	0.969527	0.242101	0.00715515	0.208052	0.0675725	set2
OGFR	OGFR	ENSG00000060491	-0.160341	0.571124	-0.221462	0.0467023	-0.0662053	0.741534	set2
COL9A3	COL9A3	ENSG00000092758	-0.230311	0.687403	-0.604188	0.000978251	-0.378506	0.0990607	set2
ARFRP1	ARFRP1	ENSG00000101246	0.304323	0.0559783	0.302676	0.0113563	-0.00651397	0.988499	set2
ZBTB46	ZBTB46	ENSG00000130584	0.307843	0.0215377	0.232434	0.0210275	-0.0802547	0.754963	set3
SAMD10	SAMD10	ENSG00000130590	0.897314	0.000348704	0.852175	0.000117613	-0.0498564	0.955494	set3
OPRL1	OPRL1	ENSG00000125510	-0.16598	0.820785	-0.437384	0.00755696	-0.277145	0.221169	set2
	FP565260.3	ENSG00000277117	1.38277	0.000514643	1.25652	0.00040616	-0.130985	0.936664	set3
U2AF1L5	U2AF1L5	ENSG00000275895	0.0214901	0.974868	0.299744	7.77614e-05	0.273572	0.000556852	set1
	FP671120.1	ENSG00000278996	-0.292013	0.542705	-0.437279	0.0383744	-0.150542	0.742538	set2
BTG3	BTG3	ENSG00000154640	0.286708	0.465922	0.800629	0.000105411	0.5095	0.0841507	set2
RWDD2B	RWDD2B	ENSG00000156253	-0.280579	0.340497	-0.422516	0.00418224	-0.146643	0.665425	set2
USP16	USP16	ENSG00000156256	0.0772508	0.888039	0.269163	0.00593155	0.187579	0.0841507	set2
BACH1	BACH1	ENSG00000156273	0.03855	0.95258	0.174273	0.0280775	0.131275	0.246845	set2
BACH1-IT1	BACH1-IT1	ENSG00000248476	0.24473	0.512582	0.340584	0.0273225	0.0914569	0.85395	set2
BACH1-IT2	BACH1-IT2	ENSG00000228817	0.475374	0.0313249	0.516133	0.00159936	0.0360464	0.956145	set3
PAXBP1-AS1	PAXBP1-AS1	ENSG00000238197	-0.412883	0.359108	-0.689964	0.00250576	-0.281814	0.491752	set2
PAXBP1	PAXBP1	ENSG00000159086	0.106856	0.687564	0.197369	0.0124426	0.0860671	0.56248	set2
IFNAR2	IFNAR2	ENSG00000159110	-0.183213	0.246377	-0.255804	0.00119387	-0.0774289	0.675929	set2
IFNGR2	IFNGR2	ENSG00000159128	0.172383	0.355748	0.222157	0.0147377	0.045257	0.855432	set2
LINC00649	LINC00649	ENSG00000237945	-0.206726	0.447398	-0.464314	6.1757e-06	-0.26223	0.0837192	set2
RUNX1	RUNX1	ENSG00000159216	-0.174215	0.232417	-0.19689	0.00832166	-0.027348	0.915755	set2
CBR3-AS1	CBR3-AS1	ENSG00000236830	-0.329715	0.0329756	-0.790112	5.51746e-20	-0.464834	1.93196e-08	set1
DOPEY2	DOPEY2	ENSG00000142197	-0.205016	0.303669	-0.28793	0.000959409	-0.0878457	0.641483	set2
DSCR3	DSCR3	ENSG00000157538	0.0887157	0.805408	0.181801	0.0340684	0.0884962	0.640252	set2
KCNJ15	KCNJ15	ENSG00000157551	-0.654967	0.0469793	-0.698011	0.00677773	-0.0472209	0.95442	set3
ETS2	ETS2	ENSG00000157557	0.0143166	0.984555	0.336974	1.97668e-05	0.317972	5.68537e-05	set1
WRB	WRB	ENSG00000182093	-0.144089	0.762342	-0.29748	0.0165783	-0.157985	0.577581	set2
MX2	MX2	ENSG00000183486	-0.231849	0.399612	-0.290385	0.0190506	-0.06292	0.840456	set2
ZBTB21	ZBTB21	ENSG00000173276	0.161763	0.58438	0.270545	0.0131121	0.104231	0.718103	set2
NDUFV3	NDUFV3	ENSG00000160194	-0.151522	0.439305	-0.235537	0.00561418	-0.0887369	0.619953	set2
ICOSLG	ICOSLG	ENSG00000160223	1.36603	6.69595e-06	1.418	3.93152e-07	0.0473366	0.970819	set3
TRPM2	TRPM2	ENSG00000142185	-0.149592	0.666431	-0.230147	0.0478143	-0.0856296	0.611865	set2
DIP2A-IT1	DIP2A-IT1	ENSG00000223692	0.389965	0.553936	0.765267	0.00539495	0.370453	0.566349	set2
BCL2L13	BCL2L13	ENSG00000099968	-0.170144	0.460921	-0.228791	0.0184048	-0.0633506	0.808937	set2
BID	BID	ENSG00000015475	0.199552	0.250031	0.277175	0.00287159	0.0729755	0.782005	set2
DGCR2	DGCR2	ENSG00000070413	-0.164737	0.687403	-0.277793	0.0152292	-0.11836	0.607154	set2
CLTCL1	CLTCL1	ENSG00000070371	-0.0976872	0.71184	-0.2342	0.00214353	-0.141309	0.145834	set2
UFD1	UFD1	ENSG00000070010	0.0600875	0.912866	0.208518	0.0182977	0.143806	0.194729	set2
RANBP1	RANBP1	ENSG00000099901	0.066685	0.906498	0.199297	0.0438228	0.127883	0.345861	set2
ZNF74	ZNF74	ENSG00000185252	-0.250475	0.394134	-0.432467	0.000761296	-0.187087	0.467926	set2
KLHL22	KLHL22	ENSG00000099910	-0.144844	0.862014	-0.388969	0.0280679	-0.249669	0.306178	set2
RGL4	RGL4	ENSG00000159496	-0.458446	0.331964	-0.58913	0.0206068	-0.135593	0.840456	set2
ZNF70	ZNF70	ENSG00000187792	0.000192937	0.999587	-0.273725	0.0346283	-0.278872	0.0313255	set1
MIATNB	MIATNB	ENSG00000244625	-0.188369	0.678072	-0.347328	0.0249149	-0.163519	0.592916	set2
PITPNB	PITPNB	ENSG00000180957	0.0979963	0.774031	0.212742	0.0138399	0.110335	0.428785	set2
TTC28-AS1	TTC28-AS1	ENSG00000235954	-0.254402	0.705338	-0.468327	0.0227115	-0.218606	0.615961	set2
CHEK2	CHEK2	ENSG00000183765	-0.206107	0.374082	-0.3131	0.00650507	-0.11163	0.641528	set2
CCDC117	CCDC117	ENSG00000159873	-0.201597	0.239331	-0.269621	0.00412959	-0.0726369	0.752798	set2
XBP1	XBP1	ENSG00000100219	0.204524	0.333901	0.730321	6.26251e-16	0.521217	5.95558e-11	set1
NIPSNAP1	NIPSNAP1	ENSG00000184117	-0.217176	0.32722	-0.275995	0.0254936	-0.063497	0.844302	set2
HMGXB4	HMGXB4	ENSG00000100281	0.0368285	0.96104	0.299659	0.000593818	0.258331	0.0086142	set1
TOM1	TOM1	ENSG00000100284	0.16077	0.511049	0.31328	0.00171677	0.147658	0.363023	set2
APOL6	APOL6	ENSG00000221963	-0.210693	0.166086	-0.265951	0.00166853	-0.0597653	0.759918	set2
APOL2	APOL2	ENSG00000128335	-0.142975	0.607415	-0.22432	0.0394114	-0.0861095	0.710672	set2
APOL1	APOL1	ENSG00000100342	-0.371726	0.169149	-0.429888	0.0116595	-0.0633212	0.904355	set2
CSF2RB	CSF2RB	ENSG00000100368	0.0901296	0.805673	0.200041	0.0168102	0.105044	0.511812	set2
RAC2	RAC2	ENSG00000128340	-0.199524	0.222765	-0.212614	0.0133561	-0.0178347	0.9512	set2
GGA1	GGA1	ENSG00000100083	0.0967798	0.782356	0.194601	0.0413156	0.0930669	0.571104	set2
SH3BP1	SH3BP1	ENSG00000100092	0.166542	0.472685	0.23726	0.00206128	0.0657662	0.786625	set2
PLA2G6	PLA2G6	ENSG00000184381	-0.270598	0.345049	-0.37614	0.0129335	-0.110396	0.739358	set2
MAFF	MAFF	ENSG00000185022	0.287403	0.293993	1.25815	4.41751e-18	0.96608	5.71764e-10	set1
APOBEC3G	APOBEC3G	ENSG00000239713	-0.189677	0.469374	-0.346717	0.00163094	-0.161464	0.437505	set2
ATF4	ATF4	ENSG00000128272	0.0457238	0.924298	0.394994	6.88564e-13	0.344621	7.12888e-09	set1
UQCRFS1P1	UQCRFS1P1	ENSG00000226085	0.345645	0.782356	1.01295	0.0095367	0.662711	0.364431	set2
RANGAP1	RANGAP1	ENSG00000100401	-0.131097	0.753896	-0.197561	0.0439881	-0.071434	0.811194	set2
TOB2	TOB2	ENSG00000183864	0.218725	0.181813	0.344402	1.96754e-05	0.120775	0.471566	set2
C22orf46	C22orf46	ENSG00000184208	-0.353857	0.042876	-0.404149	0.000709029	-0.0551066	0.8772	set3
TNFRSF13C	TNFRSF13C	ENSG00000159958	0.598724	0.204445	0.65316	0.0451034	0.0503403	0.967837	set2
NFAM1	NFAM1	ENSG00000235568	-0.325323	0.111113	-0.42813	4.77556e-05	-0.108037	0.681962	set2
RN7SKP80	RN7SKP80	ENSG00000202058	-0.648987	0.659779	-0.942485	4.12947e-06	-0.298322	0.840429	set2
MPPED1	MPPED1	ENSG00000186732	-0.729455	0.00299478	-0.714377	0.000748559	0.00990145	0.991435	set3
PNPLA3	PNPLA3	ENSG00000100344	-0.301421	0.29489	-0.783722	1.07768e-09	-0.487116	0.000152757	set1
	AL031595.3	ENSG00000280434	0.803665	0.0297844	0.62876	0.0380346	-0.179502	0.841187	set3
NUP50-AS1	NUP50-AS1	ENSG00000226328	-0.306516	0.589473	-0.510047	0.0317621	-0.207881	0.684263	set2
GTSE1	GTSE1	ENSG00000075218	-0.164012	0.506216	-0.360431	1.58687e-05	-0.201272	0.110744	set2
PIM3	PIM3	ENSG00000198355	0.670844	1.56328e-07	1.31518	1.78074e-37	0.639438	8.18897e-09	set1
TYMP	TYMP	ENSG00000025708	0.296129	0.40279	0.573164	0.000665718	0.272306	0.350917	set2
P2RY8	P2RY8	ENSG00000182162	-0.293309	0.179286	-0.351066	0.0126542	-0.0624254	0.888736	set2
PRPS2	PRPS2	ENSG00000101911	0.129946	0.740124	0.239629	0.0361392	0.104822	0.688763	set2
MBTPS2	MBTPS2	ENSG00000012174	-0.186831	0.510902	-0.25416	0.0424886	-0.071799	0.82381	set2
YY2	YY2	ENSG00000230797	0.0326074	0.989679	-0.754645	0.0453145	-0.791506	0.0927094	set2
SAT1	SAT1	ENSG00000130066	0.277651	0.0860275	0.3666	2.53024e-06	0.0844546	0.767516	set2
GK	GK	ENSG00000198814	0.254155	0.250747	0.502662	1.67202e-06	0.244335	0.122418	set2
	AC112496.1	ENSG00000241886	0.325655	0.841421	0.827461	0.049784	0.49642	0.595706	set2
RPGR	RPGR	ENSG00000156313	0.173685	0.520221	0.609643	9.27263e-13	0.431666	1.91225e-05	set1
GAPDHP1	GAPDHP1	ENSG00000228232	-0.422617	0.506216	-0.65943	0.0138399	-0.241419	0.699172	set2
BCOR	BCOR	ENSG00000183337	0.144008	0.687226	0.321852	0.000279709	0.172767	0.262776	set2
DDX3X	DDX3X	ENSG00000215301	0.151532	0.351303	0.509906	4.41751e-18	0.353819	3.28691e-09	set1
GPR34	GPR34	ENSG00000171659	-0.275326	0.19379	-0.347095	0.00201144	-0.0761437	0.770812	set2
GPR82	GPR82	ENSG00000171657	-0.578099	0.00147078	-0.869452	2.27816e-10	-0.29582	0.0623083	set3
KDM6A	KDM6A	ENSG00000147050	0.151176	0.374082	0.165223	0.0477692	0.00948732	0.975421	set2
MIR222HG	MIR222HG	ENSG00000270069	0.311722	0.101629	0.555392	2.50132e-07	0.239403	0.111932	set2
MIR221	MIR221	ENSG00000207870	0.203844	0.807285	0.655756	0.00315256	0.447097	0.208858	set2
	AC234772.3	ENSG00000269902	0.268314	0.485183	0.487162	0.000213067	0.214311	0.548273	set2
KRBOX4	KRBOX4	ENSG00000147121	-0.0771121	0.941518	-0.33013	0.0286857	-0.257434	0.205002	set2
ZNF674	ZNF674	ENSG00000251192	-0.263981	0.687403	-0.486793	0.0264446	-0.227517	0.625274	set2
RBM3	RBM3	ENSG00000102317	0.195753	0.143269	0.331659	0.000434105	0.131205	0.421645	set2
PIM2	PIM2	ENSG00000102096	0.236438	0.474253	0.758376	8.69075e-10	0.517254	0.000803181	set1
	AL034397.3	ENSG00000274536	0.0997725	0.797634	-0.449266	1.23523e-11	-0.553561	1.82033e-11	set1
CXorf65	CXorf65	ENSG00000204165	0.560337	0.50858	1.17135	0.00258477	0.605795	0.440961	set2
PBDC1	PBDC1	ENSG00000102390	0.193403	0.643598	0.440411	0.00223813	0.242657	0.337538	set2
RPL36A	RPL36A	ENSG00000241343	0.0372024	0.968233	0.387316	0.00361014	0.34548	0.0251662	set1
GLA	GLA	ENSG00000102393	0.115559	0.659603	0.240566	0.00683329	0.120349	0.432535	set2
PRPS1	PRPS1	ENSG00000147224	0.0342014	0.963655	0.245261	0.0315573	0.206341	0.140584	set2
TSC22D3	TSC22D3	ENSG00000157514	-0.0707532	0.923315	0.753955	3.06146e-21	0.819949	2.64951e-15	set1
DOCK11	DOCK11	ENSG00000147251	0.125537	0.521802	0.164571	0.0315027	0.0345426	0.862635	set2
LONRF3	LONRF3	ENSG00000175556	0.412106	0.32407	0.671188	0.0048582	0.253989	0.581859	set2
[truncated: 12 more rows]
